# Supplementary material for: Integration of Multi-Omics, Histological, and Biochemical Analysis Reveals the Toxic Responses of Nile Tilapia Liver to Chronic Microcystin-LR Exposure
Source: MDPI journal article supplement (doi:10.3390/toxins16030149), 2024-03-14
Supplement: s1 [file s1]

# Supplementary Materials: Integration of Multi-Omics, Histological, and Biochemical Analysis Reveals the Toxic Responses of Nile Tilapia Liver to Chronic Microcystin-LR Exposure

Yichao Li, Huici Yang, Bing Fu, Gen Kaneko, Hongyan Li, Jingjing Tian, Guangjun Wang,  
Mingken Wei, Jun Xie and Ermeng Yu

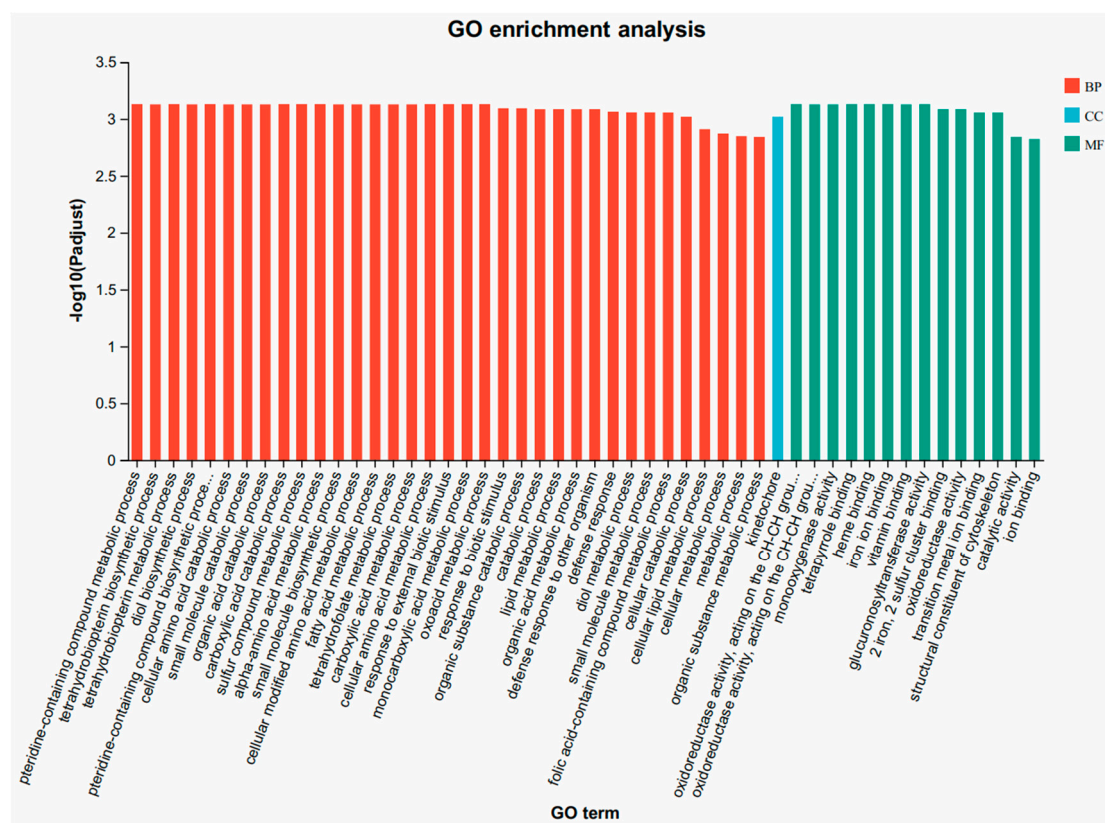

**Figure S1.** GO enrichment analysis of differential expressed genes.

**Table S1.** The composition of experimental diet ingredients (g/kg).

| Ingredients      | g/kg | Nutrients content | (%)   |
|------------------|------|-------------------|-------|
| soybean meal     | 300  | crude protein     | 30.79 |
| cottonseed meal  | 120  | crude fat         | 5.97  |
| rapeseed meal    | 200  | moisture          | 10.03 |
| wheat flour      | 120  |                   |       |
| rice bran        | 108  |                   |       |
| wheat bran       | 80   |                   |       |
| Soybean oil      | 30   |                   |       |
| choline chloride | 2    |                   |       |
| mineral mixture  | 20   |                   |       |
| vitamin mixture  | 20   |                   |       |

Note: Mineral mixture: iron 5 g/kg, copper 100 mg/kg, zinc 1.5 g/kg, manganese 0.5 g/kg, magnesium 20 g/kg, iodine 15 mg/kg, cobalt 5 mg/kg, selenium 5 mg/kg, and sodium, calcium, etc. Vitamin mixture: vitamin A 180000 IU/kg, vitamin D3 40,000 IU/ kg, vitamin E 1.6 g/kg、 vitamin K3 0.05 g/kg, vitamin B1 0.2 g/kg, vitamin B2 0.25 g/kg, vitamin B6 0.2 g/kg, vitamin B12 0.65 mg/kg, vitamin C 2.5 g/kg, niacin 0.65 g/kg, calcium pantothenate 0.65 g/kg, folic acid 0.03 g/kg, Inositol 1 g/kg, Biotin H 8.3 mg/kg.

**Table S2.** Primers used for the analysis of mRNA genes expression by qRT-PCR.

| Primes           | Gene name                                      | Sequences                                                | NCBI number/Reference |
|------------------|------------------------------------------------|----------------------------------------------------------|-----------------------|
| <i>cyp7a1</i>    | cholesterol 7- $\alpha$ -monooxygenase         | F: GGGATAAGACACAGGCAACCA<br>R: TGCGGAGGAATTGAAGTGGG      | XM_003456729.5        |
| <i>cpt1a</i>     | carnitine o-palmitoyltransferase 1             | F: TTTCCAGGCCTCCTTACCCA<br>R: TTGTACTGCTCATTGTCCAGCAGA   | XM_003440552          |
| <i>acox3</i>     | acyl-coenzyme a oxidase 3                      | F: AGGAGTCTCAGGAGATCCTCAAA<br>R: CCAGTGACCTGCAGTAGTAAACT | XM_013266255          |
| <i>acaa2</i>     | acetyl-CoA acyltransferase 2                   | F: AACGCTTCAGGTGTATCT<br>R: AAGTGCTTCTGTGATTGC           | [50]                  |
| <i>hadhb</i>     | trifunctional multienzyme complex subunit beta | F: CATGGCAAATCTGAAGGCTATGG<br>R: CAGTCTGTTTGCTACTGTGGTTG | XM_003446255.4        |
| <i>acadm</i>     | acyl-CoA dehydrogenase medium chain            | F: CCCTTGGCTTCTCATTTGAGTTG<br>R: ACCACTCTTGTCATAAGCAGGAG | XM_003448445.4        |
| <i>sod</i>       | superoxide dismutase                           | F: GACGTGACAACACAGGTTGC<br>R: TACAGCCACCGTAACAGCAG       | XM_003449940.5        |
| <i>cat</i>       | catalase                                       | F: TCAGCACAGAAGACACAGACA<br>R: GACCATTTCCTCCACTCCAGAT    | XM_031754288.1        |
| <i>gst</i>       | glutathione S-transferases                     | F: TAATGGGAGAGGGAAGATGG<br>R: CTCTGCGATGTAATTCAGG        | NM_001279635.1        |
| <i>g6pd</i>      | glucose-6-phosphate dehydrogenase              | F: GAGAAGCCCTTTGGTCGTGA<br>R: ATCAAAGTACCCTCCACGGC       | XM_005478106          |
| <i>caspase-3</i> | cysteine-aspartic acid protease 3              | F: GGAGTGGACGATACAGACGCAAA<br>R: TGAAGCTGTGTGACTGGGGCTT  | NM_001282894.1        |
| <i>bcl2</i>      | B-cell lymphoma-2                              | F: GACGATGATGCCAGGGAGAG<br>R: CTCAGAGTTCACTGGAGCGG       | XM_003437902.5        |
| <i>xiap</i>      | X-linked inhibitor of apoptosis protein        | F: TCCAGACAGGTGTAGAGGAGG<br>F: CGCACTGGAAACACAAGACTG     | XM_003445817.5        |
| <i>atg4b</i>     | autophagy related 4B cysteine peptidase        | F: CCCGATGAGACGTACCACTG<br>R: CCATATGAGAGGGCTGGCTG       | XM_003444208.4        |
| <i>atg5</i>      | autophagy related 5                            | F: ACAGCGTCTTACCCTGGAGCA<br>R: TCACAGAGCTGGATGGGCAGT     | XM_003450274.5        |
| <i>atg12</i>     | autophagy related 12                           | F: ACAGTACAGTCACTCGCTCA<br>R: AAAACACTCGAAAAGCACACC      | XM_019125508.1        |
| $\beta$ -actin   | $\beta$ -actin                                 | F: AGCCTTCCTTCCTTGGTATGGAAT<br>R: TGTGCGGTACAGGTCCTTACG  | KJ126772              |

50. Yu, L.; Tian, J.; Zhang, C.; Xue, Z.; Lu, X.; Wen, H.; Jiang, M.; Wu, F. Acetylferulic Paeonol Ester: A New Feed Additive Reduces Lipid Accumulation in the Liver of Nile Tilapia (*Oreochromis Niloticus*) by Modulating Lipid and Glucose Metabolism. *Aquaculture* **2022**, *561*, 738671

**Table S3.** Differential metabolites in the Nile tilapia **liver** of the M30 group and control group (C) (n = 6).

|    | ID       | Metabolite                                  | Metab ID    | CAS ID                | M/Z    | Retention time | Adducts      | Formula       | VIP  | FC (M30/C) | P_value |
|----|----------|---------------------------------------------|-------------|-----------------------|--------|----------------|--------------|---------------|------|------------|---------|
| 1  | neg_6394 | (6R)-Folinic acid                           | metab_13365 | -                     | 472.16 | 2.92           | M-H          | C20H23N7O7    | 2.25 | 0.35       | 0.01    |
| 2  | pos_3149 | 14-Hydroperoxy-H4-neuroprostane             | metab_2335  | -                     | 415.21 | 4.26           | M+Na         | C22H32O6      | 1.70 | 0.50       | 0.00    |
| 3  | pos_4663 | N,N,O-Tridesmethylvenlafaxine               | metab_3967  | 149289-29-2           | 218.15 | 5.63           | M+H-H2O      | C14H21NO2     | 1.79 | 0.61       | 0.00    |
| 4  | neg_2386 | Albifylline                                 | metab_9073  | -                     | 261.14 | 3.14           | M-H2O-H      | C13H20N4O3    | 1.86 | 0.64       | 0.00    |
| 5  | pos_5410 | (+/-)-Hexanoylcarnitine                     | metab_4789  | -                     | 260.19 | 3.67           | M+H          | C13H25NO4     | 1.61 | 0.66       | 0.00    |
| 6  | pos_6867 | 3-Methylguanine                             | metab_6362  | 2958-98-7             | 394.15 | 1.55           | 2M+ACN+Na    | C6H7N5O       | 1.72 | 0.68       | 0.00    |
| 7  | pos_4406 | Alpha-Codeimethine                          | metab_3688  | -                     | 331.20 | 5.91           | M+NH4        | C19H23NO3     | 1.45 | 0.68       | 0.01    |
| 8  | pos_3500 | Cannabidiol                                 | metab_2725  | 13956-29-1            | 353.19 | 5.62           | M+K          | C21H30O2      | 1.48 | 0.70       | 0.00    |
| 9  | neg_2307 | 10-Formyldihydrofolate                      | metab_8990  | 28459-40-7            | 470.14 | 3.00           | M-H          | C20H21N7O7    | 1.75 | 0.70       | 0.00    |
| 10 | neg_2792 | Loganic Acid                                | metab_9502  | 22255-40-9            | 411.11 | 3.86           | M+Cl         | C16H24O10     | 1.60 | 0.71       | 0.00    |
| 11 | neg_318  | Oxidized glutathione                        | metab_9922  | 27025-41-8;15718-51-1 | 611.15 | 1.99           | M-H, M+Na-2H | C20H32N6O12S2 | 1.18 | 0.71       | 0.00    |
| 12 | pos_6999 | PI-103                                      | metab_6505  | -                     | 371.11 | 1.15           | M+Na         | C19H16N4O3    | 1.59 | 0.72       | 0.00    |
| 13 | pos_3726 | Docosadienoate (22:2n6)                     | metab_2964  | 17735-98-7            | 354.34 | 6.29           | M+NH4        | C22H40O2      | 1.45 | 0.72       | 0.00    |
| 14 | pos_6760 | 6-(4-methyl-2-oxopentyl)-4-hydroxy-2-pyrone | metab_6252  | -                     | 242.11 | 1.72           | M+CH3OH+H    | C11H13O4-     | 1.49 | 0.72       | 0.00    |
| 15 | pos_5335 | L-Hexanoylcarnitine                         | metab_4706  | 22671-29-0            | 260.19 | 3.83           | M+H          | C13H25NO4     | 1.53 | 0.72       | 0.00    |
| 16 | pos_3506 | Ritalinic acid                              | metab_2731  | 19395-41-6            | 202.12 | 5.63           | M+H-H2O      | C13H17NO2     | 1.27 | 0.73       | 0.00    |

|    |          |                                                               |             |            |        |      |                   |              |      |      |      |
|----|----------|---------------------------------------------------------------|-------------|------------|--------|------|-------------------|--------------|------|------|------|
| 17 | neg_1602 | (1R)-Hydroxy-(2R)-glutathionyl-1,2-dihydronaphthalene         | metab_8273  | -          | 450.14 | 1.71 | M-H               | C20H25N3O7S  | 1.68 | 0.73 | 0.00 |
| 18 | pos_921  | Ethoxyquin                                                    | metab_7561  | 91-53-2    | 218.15 | 6.12 | M+H, 2M+H         | C14H19NO     | 1.32 | 0.74 | 0.01 |
| 19 | pos_504  | Polymyxin B2                                                  | metab_4381  | -          | 617.36 | 2.32 | M+2Na+H,<br>M+2Na | C55H96N16O13 | 1.42 | 0.75 | 0.01 |
| 20 | neg_6965 | 2-(N-Morpholino)-ethanesulfonic acid                          | metab_13950 | -          | 194.05 | 2.10 | M-H               | C6H13NO4S    | 1.52 | 0.75 | 0.00 |
| 21 | pos_855  | 7-Hydroxyetodolac                                             | metab_7487  | -          | 304.16 | 5.57 | M+H, M+Na         | C17H21NO4    | 1.46 | 0.75 | 0.00 |
| 22 | neg_7463 | 3-Hydroxynevirapine glucuronide                               | metab_14443 | -          | 975.31 | 1.10 | 2M+Hac-H          | C21H22N4O8   | 1.43 | 0.76 | 0.04 |
| 23 | pos_2054 | (5S,6R)-Methyl 5,6,7-trihydroxyheptanoate                     | metab_1141  | -          | 234.13 | 1.81 | M+ACN+H           | C8H16O5      | 1.34 | 0.77 | 0.00 |
| 24 | neg_3647 | Cholic Acid                                                   | metab_10425 | 81-25-4    | 453.29 | 5.82 | M+FA-H            | C24H40O5     | 1.09 | 0.77 | 0.04 |
| 25 | pos_5430 | Isoketocamphoric acid                                         | metab_4811  | -          | 234.13 | 3.63 | M+NH4             | C10H16O5     | 1.32 | 0.77 | 0.00 |
| 26 | neg_6496 | (3S,4R,5R)-1,3,4,5,6-Pentahydroxy-1-morpholin-4-ylhexan-2-one | metab_13469 | -          | 286.09 | 2.80 | M+Na-2H           | C10H19NO7    | 1.47 | 0.77 | 0.00 |
| 27 | pos_6779 | D-Xylono-1,5-lactone                                          | metab_6268  | -          | 314.11 | 1.68 | 2M+NH4            | C5H8O5       | 1.40 | 0.77 | 0.00 |
| 28 | pos_4276 | N-(2-Hydroxyethyl)heptadecanamide                             | metab_3549  | -          | 314.30 | 6.26 | M+H               | C19H39NO2    | 1.28 | 0.77 | 0.00 |
| 29 | pos_2269 | Glucaric acid                                                 | metab_1370  | 87-73-0    | 252.07 | 2.21 | M+ACN+H           | C6H10O8      | 1.18 | 0.77 | 0.00 |
| 30 | pos_4813 | Hydrocodone                                                   | metab_4131  | 125-29-1   | 317.19 | 5.29 | M+NH4             | C18H21NO3    | 1.20 | 0.78 | 0.01 |
| 31 | pos_2018 | 7,8-Dihydrobiopterin                                          | metab_1105  | 6779-87-9  | 240.11 | 1.69 | M+H               | C9H13N5O3    | 1.23 | 0.78 | 0.01 |
| 32 | pos_4721 | L-Octanoylcarnitine                                           | metab_4031  | 25243-95-2 | 288.22 | 5.54 | M+H               | C15H29NO4    | 1.33 | 0.78 | 0.00 |

|    |          |                                                                              |             |             |        |      |              |            |      |      |      |
|----|----------|------------------------------------------------------------------------------|-------------|-------------|--------|------|--------------|------------|------|------|------|
| 33 | pos_3514 | Tanacetol B                                                                  | metab_2740  | 86787-28-2  | 314.23 | 5.65 | M+NH4        | C17H28O4   | 1.29 | 0.79 | 0.00 |
| 34 | pos_3863 | Taurocholic acid                                                             | metab_3107  | 81-24-3     | 538.28 | 7.28 | M+Na         | C26H45NO7S | 1.54 | 0.79 | 0.00 |
| 35 | pos_3711 | 16-Nitroxystearate                                                           | metab_2948  | -           | 350.30 | 6.17 | M+H-2H2O     | C22H43NO4  | 1.22 | 0.79 | 0.00 |
| 36 | pos_2016 | Coelenterazine                                                               | metab_1103  | 55779-48-1  | 446.15 | 1.68 | M+Na         | C26H21N3O3 | 1.40 | 0.79 | 0.00 |
| 37 | pos_6142 | Afzelechin 7-apioside                                                        | metab_5597  | 114590-44-2 | 470.14 | 2.48 | M+ACN+Na     | C20H22O9   | 1.32 | 0.79 | 0.00 |
| 38 | neg_1688 | 2-Amino-7-[(2R)-2,3-dihydroxypropanoyl]-5,6,7,8-tetrahydro-3H-pteridin-4-one | metab_8345  | -           | 276.07 | 1.92 | M+Na-2H      | C9H13N5O4  | 1.43 | 0.80 | 0.00 |
| 39 | neg_1270 | Taurine                                                                      | metab_7955  | 107-35-7    | 249.02 | 0.84 | 2M-H         | C2H7NO3S   | 1.25 | 0.80 | 0.04 |
| 40 | neg_5766 | N6-Methyl-2'-deoxyadenosine                                                  | metab_12704 | 2002-35-9   | 246.10 | 3.82 | M-H2O-H      | C11H15N5O3 | 1.24 | 0.80 | 0.01 |
| 41 | neg_7710 | Xi-2,3-Dihydro-3,5-dihydroxy-6-methyl-4H-pyran-4-one                         | metab_14677 | -           | 203.06 | 0.79 | M+FA-H       | C7H10O4    | 1.29 | 0.81 | 0.01 |
| 42 | pos_6780 | N-Methyl-L-Proline                                                           | metab_6270  | 475-11-6    | 281.15 | 1.68 | 2M+Na        | C6H11NO2   | 1.21 | 0.82 | 0.00 |
| 43 | neg_3197 | Lotaustralin                                                                 | metab_9940  | 534-67-8    | 260.11 | 4.71 | M-H          | C11H19NO6  | 1.17 | 0.82 | 0.04 |
| 44 | pos_1078 | (10Z,12E)-Hexadecadienoylcarnitine                                           | metab_88    | -           | 396.31 | 5.88 | M+H, M+2Na-H | C23H41NO4  | 1.32 | 0.82 | 0.00 |
| 45 | pos_4588 | 3-Hydroxytetradecanoyl carnitine                                             | metab_3883  | 282523-64-2 | 388.31 | 5.75 | M+H          | C21H41NO5  | 1.21 | 0.82 | 0.01 |
| 46 | pos_5343 | 5-(4-Hydroxybenzyl)thiazolidine-2,4-dione                                    | metab_4715  | -           | 224.04 | 3.81 | M+H          | C10H9NO3S  | 1.04 | 0.82 | 0.02 |
| 47 | neg_6998 | O-Succinyl-L-homoserine                                                      | metab_13984 | 1492-23-5   | 218.07 | 2.08 | M-H          | C8H13NO6   | 1.32 | 0.82 | 0.00 |

|    |          |                                                                    |                  |                                        |        |      |                  |             |      |      |      |
|----|----------|--------------------------------------------------------------------|------------------|----------------------------------------|--------|------|------------------|-------------|------|------|------|
| 48 | neg_2376 | Normorphine<br>glucuronide                                         | 3-<br>metab_9062 | -                                      | 468.13 | 3.12 | M+Na-2H          | C22H25NO9   | 1.39 | 0.82 | 0.00 |
| 49 | neg_2433 | Kojibiose                                                          | metab_9121       | 2140-29-6                              | 377.09 | 3.18 | M+Cl             | C12H22O11   | 1.14 | 0.83 | 0.03 |
| 50 | pos_1891 | 2-Amino-6-methyl-2,3,6,7-<br>tetrahydro-1H-pteridin-4-<br>one      | metab_966        | -                                      | 182.10 | 1.30 | M+H              | C7H11N5O    | 1.14 | 0.83 | 0.00 |
| 51 | pos_4628 | Algestone                                                          | metab_3928       | 595-77-7                               | 364.25 | 5.69 | M+NH4            | C21H30O4    | 1.10 | 0.83 | 0.00 |
| 52 | neg_2278 | S-<br>Glutaryl dihydro lipamide                                    | metab_8960       | -                                      | 366.11 | 2.95 | M+FA-H           | C13H23NO4S2 | 1.34 | 0.83 | 0.00 |
| 53 | pos_584  | 4-[(2,4-Dihydroxy-3,3-<br>dimethylbutanoyl)amino]b<br>utanoic acid | metab_5263       | -                                      | 234.13 | 2.91 | M+H, M+Na        | C10H19NO5   | 1.28 | 0.83 | 0.00 |
| 54 | pos_4593 | Hexadecanedioic acid<br>mono-L-carnitine ester                     | metab_3889       | 42150-38-9                             | 412.31 | 5.74 | M+H-H2O          | C23H43NO6   | 1.14 | 0.83 | 0.01 |
| 55 | pos_1068 | 2-<br>Hydroxymyristoyl carnitine                                   | metab_77         | -                                      | 370.29 | 5.89 | M+H-H2O,<br>M+H  | C21H41NO5   | 1.26 | 0.83 | 0.00 |
| 56 | neg_6681 | Omega-Salicylsalicylic acid                                        | metab_1366<br>2  | -                                      | 441.09 | 2.53 | M+Cl             | C20H22O9    | 1.37 | 0.84 | 0.00 |
| 57 | neg_7471 | Gamma-Glutamyl-beta-<br>cyanoalanine                               | metab_1445<br>1  | 16051-95-9                             | 288.08 | 1.09 | M+FA-H           | C9H13N3O5   | 1.26 | 0.84 | 0.00 |
| 58 | neg_2445 | Lamivudine sulfoxide                                               | metab_9132       | -                                      | 266.02 | 3.20 | M+Na-2H          | C8H11N3O4S  | 1.20 | 0.84 | 0.00 |
| 59 | pos_6522 | Dipropyl disulfide                                                 | metab_6001       | 629-19-6                               | 151.06 | 2.02 | M+H              | C6H14S2     | 1.17 | 0.84 | 0.00 |
| 60 | neg_927  | 20-COOH ltb4                                                       | metab_1532<br>4  | 80434-82-8                             | 425.22 | 4.03 | M+Cl, M+FA-<br>H | C21H32O6    | 1.23 | 0.84 | 0.01 |
| 61 | neg_6943 | Neopterin                                                          | metab_1392<br>7  | 2277-42-<br>1;2009-64-<br>5;10162-32-0 | 565.18 | 2.10 | 2M+Hac-H         | C9H11N5O4   | 1.31 | 0.84 | 0.00 |

|    |          |                                                                 |             |            |        |      |                   |            |      |      |      |
|----|----------|-----------------------------------------------------------------|-------------|------------|--------|------|-------------------|------------|------|------|------|
| 62 | pos_7130 | N-formimidoyl-glutamic acid                                     | metab_6644  | 816-90-0   | 175.07 | 0.95 | M+H               | C6H10N2O4  | 1.23 | 0.84 | 0.00 |
| 63 | pos_6725 | L-Histidinol                                                    | metab_6215  | 4836-52-6  | 174.12 | 1.83 | M+CH3OH+H         | C6H11N3O   | 1.16 | 0.84 | 0.00 |
| 64 | pos_4615 | Lauroylcarnitine                                                | metab_3914  | 25518-54-1 | 366.26 | 5.71 | M+Na              | C19H37NO4  | 1.13 | 0.85 | 0.00 |
| 65 | neg_2610 | 1,2-Epoxy-3-(p-nitrophenoxy)propane                             | metab_9306  | 5255-75-4  | 194.05 | 3.52 | M-H               | C9H9NO4    | 1.22 | 0.85 | 0.00 |
| 66 | pos_4255 | PC(18:4(6Z,9Z,12Z,15Z)/18:3(6Z,9Z,12Z))                         | metab_3529  | -          | 776.52 | 6.36 | M+H               | C44H74NO8P | 1.10 | 0.85 | 0.01 |
| 67 | neg_1365 | 3,5,6-Trihydroxy-5-(hydroxymethyl)-2-methoxy-2-cyclohexen-1-one | metab_8042  | 76663-30-4 | 203.06 | 0.99 | M-H               | C8H12O6    | 1.22 | 0.85 | 0.00 |
| 68 | pos_410  | Ketone Ester                                                    | metab_3366  | -          | 218.14 | 1.91 | M+NH4,<br>M+ACN+H | C8H16O4    | 1.20 | 0.85 | 0.00 |
| 69 | neg_7428 | D-Arabinono-1,4-lactone                                         | metab_14407 | 322392.00  | 147.03 | 1.17 | M-H               | C5H8O5     | 1.28 | 0.85 | 0.02 |
| 70 | pos_2042 | 8-Hydroxyguanosine                                              | metab_1128  | 3868-31-3  | 322.08 | 1.75 | M+Na              | C10H13N5O6 | 1.09 | 0.86 | 0.00 |
| 71 | neg_1447 | Cytosine deoxyribonucleoside                                    | metab_8121  | 951-77-9   | 272.09 | 1.18 | M+FA-H            | C9H13N3O4  | 1.03 | 0.86 | 0.02 |
| 72 | pos_6886 | SCHEMBL13960539                                                 | metab_6383  | -          | 501.19 | 1.50 | M+K               | C26H30N4O4 | 1.15 | 0.86 | 0.00 |
| 73 | pos_4629 | Decanoylcarnitine                                               | metab_3929  | 1492-27-9  | 316.25 | 5.69 | M+H               | C17H33NO4  | 1.07 | 0.86 | 0.00 |
| 74 | neg_4920 | Y1 Receptor antagonist 1                                        | metab_11781 | -          | 486.25 | 5.59 | M-H               | C28H33N5O3 | 1.05 | 0.86 | 0.02 |
| 75 | pos_7101 | Succinic acid semialdehyde                                      | metab_6613  | 692-29-5   | 205.07 | 0.99 | 2M+H              | C4H6O3     | 1.10 | 0.86 | 0.00 |



|    |          |                                     |             |                       |        |      |                   |             |      |      |      |
|----|----------|-------------------------------------|-------------|-----------------------|--------|------|-------------------|-------------|------|------|------|
| 76 | pos_4552 | 6-Hydroxyhexadecanoylcarnitine      | metab_3845  | -                     | 398.33 | 5.78 | M+H-H2O           | C23H45NO5   | 1.12 | 0.87 | 0.00 |
| 77 | neg_7866 | 5-L-Glutamyl-aurine                 | metab_14832 | 56488-60-9            | 253.05 | 0.63 | M-H               | C7H14N2O6S  | 1.21 | 0.87 | 0.00 |
| 78 | pos_6715 | Galactaric acid                     | metab_7660  | 526-99-8              | 252.07 | 1.83 | M+ACN+H           | C6H10O8     | 1.06 | 0.87 | 0.00 |
| 79 | pos_4266 | Paullinic acid                      | metab_3541  | 17735-94-3            | 328.32 | 6.32 | M+NH4             | C20H38O2    | 1.09 | 0.87 | 0.00 |
| 80 | neg_5199 | Tranexamic Acid                     | metab_12087 | 1197-18-8             | 202.11 | 4.87 | M+FA-H            | C8H15NO2    | 1.05 | 0.87 | 0.00 |
| 81 | pos_899  | Fluocortin butyl                    | metab_7535  | -                     | 488.28 | 5.90 | M+NH4,<br>M+ACN+H | C26H35FO5   | 1.14 | 0.87 | 0.00 |
| 82 | pos_1275 | N-Acetylasparagine                  | metab_306   | 4033-40-3             | 175.07 | 0.66 | M+H-H2O,<br>M+H   | C6H10N2O4   | 1.17 | 0.87 | 0.00 |
| 83 | pos_1115 | MG(20:5(5Z,8Z,11Z,14Z,17Z)/0:0/0:0) | metab_129   | -                     | 394.29 | 5.75 | M+NH4,<br>M+ACN+H | C23H36O4    | 1.04 | 0.87 | 0.00 |
| 84 | neg_2114 | Formycin b                          | metab_8784  | -                     | 249.06 | 2.70 | M-H2O-H           | C10H12N4O5  | 1.20 | 0.88 | 0.00 |
| 85 | pos_3743 | PC(18:4(6Z,9Z,12Z,15Z)/14:0)        | metab_2983  | -                     | 726.51 | 6.39 | M+H               | C40H72NO8P  | 1.06 | 0.88 | 0.00 |
| 86 | pos_3759 | PC(14:0/18:3(9Z,12Z,15Z))           | metab_2999  | -                     | 728.52 | 6.48 | M+H               | C40H74NO8P  | 1.02 | 0.88 | 0.01 |
| 87 | pos_1558 | L-Carnitine                         | metab_614   | 541-15-1              | 162.11 | 0.61 | M+H               | C7H15NO3    | 1.17 | 0.88 | 0.00 |
| 88 | neg_2134 | 8-Oxo-dGMP                          | metab_8805  | 127027-50-3           | 384.03 | 2.73 | M+Na-2H           | C10H14N5O8P | 1.08 | 0.88 | 0.00 |
| 89 | pos_6304 | Lysocellin                          | metab_5772  | -                     | 337.20 | 2.25 | M+2Na             | C34H60O10   | 1.13 | 0.88 | 0.00 |
| 90 | pos_301  | Cytidine                            | metab_2181  | 65-46-3               | 244.09 | 1.02 | M+H, 2M+H         | C9H13N3O5   | 1.15 | 0.88 | 0.00 |
| 91 | pos_1260 | Citrulline                          | metab_290   | 372-75-8              | 176.10 | 0.62 | M+H, M+K          | C6H13N3O3   | 1.00 | 0.88 | 0.00 |
| 92 | pos_6481 | Zeranol                             | metab_7676  | 36455-72-8;26538-44-3 | 367.15 | 2.03 | M+2Na-H           | C18H26O5    | 1.02 | 0.89 | 0.00 |
| 93 | pos_7354 | Cytarabine                          | metab_6878  | 147-94-4              | 244.09 | 0.69 | M+H               | C9H13N3O5   | 1.04 | 0.89 | 0.00 |

|     |          |                                                                        |                 |                        |        |      |               |                   |      |      |      |
|-----|----------|------------------------------------------------------------------------|-----------------|------------------------|--------|------|---------------|-------------------|------|------|------|
| 94  | neg_1930 | 4-(4-Fluorophenyl)-3-(4-hydroxy-3-methoxyphenoxymethyl)pi<br>peridine  | metab_8595      | -                      | 352.13 | 2.38 | M+Na-2H       | C19H22FNO3        | 1.01 | 0.89 | 0.00 |
| 95  | neg_7593 | Toralactone                                                            | metab_1456<br>6 | 41743-74-2             | 253.05 | 0.90 | M-H2O-H       | C15H12O5          | 1.09 | 0.89 | 0.00 |
| 96  | neg_7209 | Citramalic Acid                                                        | metab_1420<br>2 | 597-44-<br>4;2306-22-1 | 147.03 | 1.78 | M-H           | C5H8O5            | 1.06 | 0.89 | 0.01 |
| 97  | pos_6599 | Trans-3,4-Dihydro-3,4-<br>dihydroxy-7,12-<br>dimethylbenz[a]anthracene | metab_6083      | 68162-13-0             | 354.15 | 1.94 | M+ACN+Na      | C20H18O2          | 1.02 | 0.90 | 0.00 |
| 98  | pos_6740 | Morph                                                                  | metab_6230      | 57-27-2                | 261.14 | 1.78 | M+CH3OH+<br>H | C10H16N2O4        | 1.04 | 0.90 | 0.00 |
| 99  | neg_1865 | Astringin                                                              | metab_8531      | 29884-49-9             | 441.09 | 2.13 | M+Cl          | C20H22O9          | 1.11 | 0.90 | 0.00 |
| 100 | neg_7235 | LEUCOGENENOL                                                           | metab_1422<br>0 | -                      | 404.13 | 1.71 | M+Na-2H       | C18H25NO8         | 1.01 | 0.90 | 0.00 |
| 101 | neg_7082 | 4-Aminophenylmannoside                                                 | metab_1407<br>4 | -                      | 306.08 | 2.00 | M+Cl          | C12H17NO6         | 1.01 | 0.90 | 0.00 |
| 102 | neg_7611 | 3-Phosphoglycerate                                                     | metab_1540<br>2 | 820-11-<br>1;3443-58-1 | 184.99 | 0.88 | M-H           | C3H7O7P           | 1.02 | 0.90 | 0.00 |
| 103 | neg_2244 | Quercetin 3-gluco-xyloside                                             | metab_8923      | -                      | 577.12 | 2.90 | M-H2O-H       | C26H28O16         | 1.06 | 0.91 | 0.00 |
| 104 | neg_6997 | Lysozyme                                                               | metab_1398<br>3 | -                      | 250.06 | 2.08 | M+FA-H        | C8H15NOS2         | 1.02 | 0.91 | 0.00 |
| 105 | neg_4615 | Oxymesterone                                                           | metab_1145<br>6 | 145-12-0               | 317.21 | 6.01 | M-H           | C20H30O3          | 1.01 | 0.91 | 0.00 |
| 106 | neg_2491 | FAD                                                                    | metab_9177      | 146-14-5               | 784.15 | 3.25 | M-H           | C27H33N9O15P<br>2 | 1.01 | 0.92 | 0.00 |

|     |          |                                                     |                 |            |        |      |                                                      |                                                                 |      |      |      |
|-----|----------|-----------------------------------------------------|-----------------|------------|--------|------|------------------------------------------------------|-----------------------------------------------------------------|------|------|------|
| 107 | pos_345  | Isobutylidene                                       | metab_2668      | -          | 175.12 | 0.57 | M+H-H <sub>2</sub> O,<br>M+H                         | C <sub>6</sub> H <sub>14</sub> N <sub>4</sub> O <sub>2</sub>    | 1.03 | 1.10 | 0.00 |
| 108 | neg_5034 | Stercobilin                                         | metab_1190<br>6 | 34217-90-8 | 629.32 | 5.35 | M+Cl                                                 | C <sub>33</sub> H <sub>46</sub> N <sub>4</sub> O <sub>6</sub>   | 1.02 | 1.11 | 0.00 |
| 109 | pos_54   | V-PYRRO/NO                                          | metab_4776      | -          | 175.12 | 0.81 | M+H,<br>M+NH <sub>4</sub> ,<br>M+H-2H <sub>2</sub> O | C <sub>6</sub> H <sub>11</sub> N <sub>3</sub> O <sub>2</sub>    | 1.04 | 1.11 | 0.00 |
| 110 | neg_7503 | 3-Methylthiopropionic acid                          | metab_1448<br>2 | 646-01-5   | 165.02 | 1.03 | M+FA-H                                               | C <sub>4</sub> H <sub>8</sub> O <sub>2</sub> S                  | 1.11 | 1.12 | 0.00 |
| 111 | pos_2312 | Gly-Ile                                             | metab_1417      | -          | 189.12 | 2.28 | M+H                                                  | C <sub>8</sub> H <sub>16</sub> N <sub>2</sub> O <sub>3</sub>    | 1.00 | 1.12 | 0.02 |
| 112 | neg_656  | Fe(II)-nicotianamine                                | metab_1353<br>7 | -          | 302.14 | 2.47 | M-H, M+Na-<br>2H                                     | C <sub>12</sub> H <sub>21</sub> N <sub>3</sub> O <sub>6</sub>   | 1.09 | 1.12 | 0.01 |
| 113 | neg_2494 | Leucyl-Methionine                                   | metab_9180      | -          | 261.13 | 3.27 | M-H                                                  | C <sub>11</sub> H <sub>22</sub> N <sub>2</sub> O <sub>3</sub> S | 1.01 | 1.13 | 0.03 |
| 114 | neg_6774 | Eltoprazine                                         | metab_1375<br>6 | -          | 265.12 | 2.41 | M+FA-H                                               | C <sub>12</sub> H <sub>16</sub> N <sub>2</sub> O <sub>2</sub>   | 1.02 | 1.13 | 0.03 |
| 115 | pos_2010 | L-Theanine                                          | metab_1097      | 3081-61-6  | 175.11 | 1.65 | M+H                                                  | C <sub>7</sub> H <sub>14</sub> N <sub>2</sub> O <sub>3</sub>    | 1.00 | 1.13 | 0.02 |
| 116 | pos_6967 | Prostratin                                          | metab_6472      | 60857-08-1 | 435.17 | 1.21 | M+2Na-H                                              | C <sub>22</sub> H <sub>30</sub> O <sub>6</sub>                  | 1.04 | 1.13 | 0.00 |
| 117 | neg_7971 | 2-Amino-4-[carbamimidoyl(methyl)amino]butanoic acid | metab_1493<br>5 | -          | 173.10 | 0.56 | M-H                                                  | C <sub>6</sub> H <sub>14</sub> N <sub>4</sub> O <sub>2</sub>    | 1.08 | 1.13 | 0.01 |
| 118 | neg_6543 | Undeca-4,6,8-trienedioylcarnitine                   | metab_1352<br>0 | -          | 374.16 | 2.74 | M+Na-2H                                              | C <sub>18</sub> H <sub>27</sub> N <sub>3</sub> O <sub>6</sub>   | 1.06 | 1.13 | 0.01 |
| 119 | pos_2463 | Deoxypyridinoline                                   | metab_1579      | 83462-55-9 | 445.23 | 2.56 | M+CH <sub>3</sub> OH+<br>H                           | C <sub>18</sub> H <sub>28</sub> N <sub>4</sub> O <sub>7</sub>   | 1.03 | 1.13 | 0.01 |
| 120 | neg_6614 | 6-Hydroxymelatonin                                  | metab_1359<br>5 | 2208-41-5  | 293.11 | 2.62 | M+FA-H                                               | C <sub>13</sub> H <sub>16</sub> N <sub>2</sub> O <sub>3</sub>   | 1.06 | 1.13 | 0.03 |

|     |          |                                                             |             |                  |        |      |                     |             |      |      |      |
|-----|----------|-------------------------------------------------------------|-------------|------------------|--------|------|---------------------|-------------|------|------|------|
| 121 | pos_6245 | 4-Hydroxyproline                                            | metab_7649  | 51-35-4;618-27-9 | 304.15 | 2.32 | 2M+ACN+H            | C5H9NO3     | 1.02 | 1.13 | 0.00 |
| 122 | neg_340  | 5-(Hydroxymethyl)-1H-pyrrole-2-carbaldehyde                 | metab_10165 | -                | 309.11 | 2.08 | 2M-H,<br>2M+Hac-H   | C6H7NO2     | 1.08 | 1.13 | 0.01 |
| 123 | pos_369  | Gln Val                                                     | metab_2925  | -                | 246.14 | 1.64 | M+H-H2O,<br>M+H     | C10H19N3O4  | 1.02 | 1.13 | 0.01 |
| 124 | neg_8121 | Seryllysine                                                 | metab_15099 | 22677-61-8       | 232.13 | 0.50 | M-H                 | C9H19N3O4   | 1.03 | 1.13 | 0.02 |
| 125 | pos_39   | (2S)-2-Amino-6-[(3-formylpiperidin-1-yl)amino]hexanoic acid | metab_3145  | -                | 275.21 | 0.48 | M+2H,<br>M+NH4, M+H | C12H23N3O3  | 1.04 | 1.13 | 0.00 |
| 126 | pos_4222 | 1-O-Hexadecyl-2-C-Methyl-3-Phosphatidylcholine              | metab_3494  | -                | 496.38 | 6.53 | M+H                 | C25H54NO6P  | 1.04 | 1.13 | 0.00 |
| 127 | pos_5739 | Isofebrifugine                                              | metab_5151  | 32434-44-9       | 302.15 | 3.09 | M+H                 | C16H19N3O3  | 1.00 | 1.13 | 0.02 |
| 128 | neg_7825 | Prolylglycine                                               | metab_14794 | 2578-57-6        | 217.08 | 0.67 | M+FA-H              | C7H12N2O3   | 1.04 | 1.13 | 0.03 |
| 129 | neg_1713 | TETRAHYDROURIDINE                                           | metab_8373  | -                | 229.08 | 1.96 | M-H2O-H             | C9H16N2O6   | 1.04 | 1.13 | 0.03 |
| 130 | neg_2175 | ALA-ILE                                                     | metab_8848  | 29727-65-9       | 201.12 | 2.80 | M-H                 | C9H18N2O3   | 1.10 | 1.13 | 0.03 |
| 131 | neg_1968 | Quinagolida                                                 | metab_8635  | -                | 430.19 | 2.43 | M+Cl                | C20H33N3O3S | 1.10 | 1.14 | 0.01 |
| 132 | pos_1250 | Pro Arg                                                     | metab_279   | -                | 272.17 | 0.61 | M+2H, M+H           | C11H21N5O3  | 1.00 | 1.14 | 0.01 |
| 133 | neg_660  | H-Tyr-gly-gly-OH                                            | metab_13580 | -                | 294.11 | 2.48 | M-H, M+FA-H         | C13H17N3O5  | 1.04 | 1.14 | 0.02 |
| 134 | neg_7191 | Methionyl-Glycine                                           | metab_14184 | -                | 205.06 | 1.82 | M-H                 | C7H14N2O3S  | 1.10 | 1.14 | 0.02 |
| 135 | pos_1224 | Histidylleucine                                             | metab_250   | 7763-65-7        | 269.16 | 1.49 | M+H-H2O,<br>M+H     | C12H20N4O3  | 1.10 | 1.14 | 0.01 |

|     |          |                                 |             |             |        |      |                 |             |      |      |      |
|-----|----------|---------------------------------|-------------|-------------|--------|------|-----------------|-------------|------|------|------|
| 136 | pos_6778 | Ile Thr                         | metab_6267  | -           | 233.15 | 1.69 | M+H             | C10H20N2O4  | 1.02 | 1.14 | 0.01 |
| 137 | neg_808  | Valylleucine                    | metab_15055 | 3989-97-7   | 229.16 | 3.25 | M-H, 2M-H       | C11H22N2O3  | 1.11 | 1.14 | 0.03 |
| 138 | neg_2477 | Phenol sulphate                 | metab_15433 | 937-34-8    | 172.99 | 3.24 | M-H             | C6H6O4S     | 1.21 | 1.14 | 0.00 |
| 139 | neg_5654 | Fasoracetam                     | metab_12583 | 110958-19-5 | 241.12 | 4.00 | M+FA-H          | C10H16N2O2  | 1.05 | 1.14 | 0.03 |
| 140 | pos_1482 | Ser Lys                         | metab_533   | -           | 234.14 | 0.50 | M+H             | C9H19N3O4   | 1.02 | 1.14 | 0.01 |
| 141 | neg_6359 | Neuromedin B (1-3)              | metab_13326 | -           | 301.15 | 2.97 | M-H             | C12H22N4O5  | 1.10 | 1.14 | 0.01 |
| 142 | pos_7684 | Alanylllysine                   | metab_7237  | 6366-77-4   | 218.15 | 0.50 | M+H             | C9H19N3O3   | 1.05 | 1.14 | 0.01 |
| 143 | pos_5136 | Ser Ile Phe                     | metab_4487  | -           | 366.20 | 4.28 | M+H             | C18H27N3O5  | 1.01 | 1.14 | 0.00 |
| 144 | pos_1124 | Ile Thr Phe                     | metab_139   | -           | 380.22 | 4.38 | M+H, M+Na       | C19H29N3O5  | 1.03 | 1.14 | 0.00 |
| 145 | pos_5017 | Ser Val Gln Leu Leu             | metab_4357  | -           | 559.34 | 4.54 | M+H             | C25H46N6O8  | 1.03 | 1.14 | 0.00 |
| 146 | pos_6879 | N(epsilon)-(carboxyethyl)lysine | metab_6375  | -           | 219.13 | 1.52 | M+H             | C9H18N2O4   | 1.09 | 1.14 | 0.00 |
| 147 | neg_5937 | PS(5-iso PGF2VI/14:1(9Z))       | metab_12890 | -           | 812.38 | 3.54 | M+K-2H          | C38H66NO13P | 1.03 | 1.14 | 0.04 |
| 148 | neg_2747 | Leucylleucine                   | metab_9453  | 3303-31-9   | 243.17 | 3.78 | M-H             | C12H24N2O3  | 1.07 | 1.14 | 0.05 |
| 149 | pos_384  | N6-Acetyl-L-lysine              | metab_3082  | 692-04-6    | 189.12 | 1.60 | M+H, 2M+H       | C8H16N2O3   | 1.06 | 1.14 | 0.01 |
| 150 | pos_1608 | Valyllsine                      | metab_665   | 22677-62-9  | 246.18 | 0.69 | M+H             | C11H23N3O3  | 1.12 | 1.14 | 0.00 |
| 151 | neg_7857 | Threonylalanine                 | metab_14824 | 56217-50-6  | 189.09 | 0.64 | M-H             | C7H14N2O4   | 1.05 | 1.14 | 0.01 |
| 152 | neg_4990 | Phe-Pro-Ile                     | metab_11857 | -           | 420.21 | 5.50 | M+FA-H          | C20H29N3O4  | 1.08 | 1.14 | 0.00 |
| 153 | pos_1373 | Threoninyl-Gamma-glutamate      | metab_415   | -           | 248.12 | 0.92 | M+H-H2O,<br>M+H | C9H17N3O5   | 1.03 | 1.14 | 0.01 |

|     |          |                                         |             |             |        |      |           |             |      |      |      |
|-----|----------|-----------------------------------------|-------------|-------------|--------|------|-----------|-------------|------|------|------|
| 154 | neg_7008 | Ophthalmic acid                         | metab_13996 | 495-27-2    | 288.12 | 2.07 | M-H       | C11H19N3O6  | 1.12 | 1.14 | 0.00 |
| 155 | pos_2728 | Lys Leu Phe                             | metab_1869  | -           | 407.26 | 3.13 | M+H       | C21H34N4O4  | 1.01 | 1.14 | 0.00 |
| 156 | pos_1915 | Val Thr His                             | metab_992   | -           | 356.19 | 1.40 | M+H       | C15H25N5O5  | 1.09 | 1.14 | 0.00 |
| 157 | neg_3754 | Dehydroeburicoic acid                   | metab_10538 | -           | 449.34 | 6.07 | M-H2O-H   | C31H48O3    | 1.08 | 1.14 | 0.00 |
| 158 | pos_1148 | Deoxycholyllhistidine                   | metab_165   | -           | 530.35 | 2.17 | M+2H, M+H | C30H47N3O5  | 1.05 | 1.14 | 0.01 |
| 159 | pos_6697 | Tyr Glu                                 | metab_6186  | -           | 311.12 | 1.85 | M+H       | C14H18N2O6  | 1.02 | 1.14 | 0.01 |
| 160 | neg_2020 | Batatasin IV                            | metab_8692  | 60347-67-3  | 487.22 | 2.52 | 2M-H      | C15H16O3    | 1.13 | 1.14 | 0.02 |
| 161 | neg_2850 | Isoleucyl-Leucine                       | metab_9566  | -           | 243.17 | 3.97 | M-H       | C12H24N2O3  | 1.10 | 1.14 | 0.04 |
| 162 | neg_4533 | 14-demethyl lanosterol                  | metab_11369 | 2026401.00  | 455.35 | 6.13 | M+FA-H    | C29H46O     | 1.04 | 1.14 | 0.04 |
| 163 | neg_1413 | Tetrahydrothiophene-3-ol<br>1,1-dioxide | metab_8088  | -           | 181.02 | 1.10 | M+FA-H    | C4H8O3S     | 1.09 | 1.14 | 0.00 |
| 164 | neg_7993 | Beta-Alanyl-L-lysine                    | metab_14958 | -           | 216.14 | 0.56 | M-H       | C9H19N3O3   | 1.09 | 1.14 | 0.02 |
| 165 | pos_2670 | PIP(PGF2alpha/20:1(11Z))                | metab_1805  | -           | 522.28 | 3.01 | M+2H      | C49H88O19P2 | 1.06 | 1.14 | 0.01 |
| 166 | pos_6545 | Phenylalanylarginine                    | metab_6025  | 1238-09-1   | 322.19 | 1.99 | M+H       | C15H23N5O3  | 1.01 | 1.14 | 0.02 |
| 167 | pos_6736 | Thr Ile Lys Glu                         | metab_6226  | -           | 490.29 | 1.80 | M+H       | C21H39N5O8  | 1.01 | 1.15 | 0.02 |
| 168 | neg_2889 | N-(3-acetamidopropyl)pyrrolidin-2-one   | metab_9607  | 106692-36-8 | 229.12 | 4.05 | M+FA-H    | C9H16N2O2   | 1.01 | 1.15 | 0.01 |
| 169 | neg_7200 | Petasinine                              | metab_14195 | 70474-33-8  | 260.13 | 1.80 | M+Na-2H   | C13H21NO3   | 1.14 | 1.15 | 0.00 |
| 170 | neg_857  | Tyrosyl-Isoleucine                      | metab_15247 | -           | 293.15 | 3.57 | M-H, 2M-H | C15H22N2O4  | 1.16 | 1.15 | 0.02 |

|     |          |                                                                 |                 |            |        |      |                       |             |      |      |      |
|-----|----------|-----------------------------------------------------------------|-----------------|------------|--------|------|-----------------------|-------------|------|------|------|
| 171 | neg_6741 | Aminoglutethimide                                               | metab_1372<br>1 | 125-84-8   | 277.12 | 2.47 | M+FA-H                | C13H16N2O2  | 1.06 | 1.15 | 0.03 |
| 172 | pos_375  | Ile Ser                                                         | metab_2990      | -          | 260.16 | 1.70 | M+H,<br>M+ACN+H       | C9H18N2O4   | 1.13 | 1.15 | 0.01 |
| 173 | neg_6252 | TRIETHYLENE GLYCOL                                              | metab_1321<br>1 | -          | 345.18 | 3.12 | 2M+FA-H               | C6H14O4     | 1.22 | 1.15 | 0.01 |
| 174 | pos_180  | ALANYL-dl-LEUCINE                                               | metab_869       | -          | 203.14 | 2.26 | M+H, M+Na,<br>M+H-H2O | C9H18N2O3   | 1.09 | 1.15 | 0.02 |
| 175 | pos_471  | Gln Ile                                                         | metab_4018      | -          | 260.16 | 2.21 | M+H-H2O,<br>M+H       | C11H21N3O4  | 1.09 | 1.15 | 0.02 |
| 176 | neg_5209 | Tezampanel                                                      | metab_1209<br>9 | -          | 557.33 | 4.85 | 2M-H                  | C13H21N5O2  | 1.18 | 1.15 | 0.00 |
| 177 | pos_1898 | Lys Val                                                         | metab_973       | -          | 246.18 | 1.32 | M+H                   | C11H23N3O3  | 1.10 | 1.15 | 0.01 |
| 178 | neg_6529 | Guanadrel                                                       | metab_1350<br>5 | 40580-59-4 | 258.15 | 2.76 | M+FA-H                | C10H19N3O2  | 1.17 | 1.15 | 0.02 |
| 179 | pos_7489 | (+)-gamma-Hydroxy-L-homoarginine                                | metab_7024      | 1616-99-5  | 246.16 | 0.58 | M+ACN+H               | C7H16N4O3   | 1.03 | 1.15 | 0.03 |
| 180 | pos_6465 | Glutamylphenylalanine                                           | metab_5938      | 20556-22-3 | 606.27 | 2.03 | 2M+NH4                | C14H18N2O5  | 1.01 | 1.15 | 0.02 |
| 181 | neg_3013 | L-Prolinamide,D-tyrosyl-L-arginylglycyl-4-nitro-L-phenylalanyl- | metab_9743      | -          | 663.30 | 4.29 | M-H2O-H               | C31H42N10O8 | 1.16 | 1.15 | 0.00 |
| 182 | pos_2779 | Leu Glu Val                                                     | metab_1925      | -          | 360.21 | 3.25 | M+H                   | C16H29N3O6  | 1.09 | 1.15 | 0.00 |
| 183 | neg_2295 | Uridine, 2'-deoxy-2'-fluoro-2'-methyl-, (2'R)-                  | metab_8978      | -          | 305.08 | 2.99 | M+FA-H                | C10H13FN2O5 | 1.21 | 1.15 | 0.00 |
| 184 | neg_3258 | 4-(2,2,6,6-Tetramethyl-1-oxylpiperidin-4-ylamino)-4'-           | metab_1000<br>8 | -          | 535.24 | 4.87 | M-H2O-H               | C30H38N2O8  | 1.13 | 1.15 | 0.00 |

|     |          |                                                  |                 |             |        |      |                    |            |      |      |      |
|-----|----------|--------------------------------------------------|-----------------|-------------|--------|------|--------------------|------------|------|------|------|
|     |          | demethylepipodophyllotox<br>in                   |                 |             |        |      |                    |            |      |      |      |
| 185 | neg_1605 | Ala Val Asp Asp                                  | metab_8276      | -           | 417.16 | 1.71 | M-H                | C16H26N4O9 | 1.12 | 1.15 | 0.03 |
| 186 | pos_6859 | Val Arg Ala                                      | metab_6353      | -           | 345.22 | 1.58 | M+H                | C14H28N6O4 | 1.09 | 1.15 | 0.00 |
| 187 | pos_5246 | Thr Ile Leu                                      | metab_4607      | -           | 346.23 | 4.02 | M+H                | C16H31N3O5 | 1.06 | 1.15 | 0.00 |
| 188 | pos_5529 | Sisomicin sulfate                                | metab_4918      | -           | 430.27 | 3.43 | M+H-H2O            | C19H37N5O7 | 1.08 | 1.15 | 0.00 |
| 189 | neg_223  | Oxoglutaric acid                                 | metab_8907      | 328-50-7    | 191.02 | 1.09 | M-H2O-H,<br>M+FA-H | C5H6O5     | 1.07 | 1.15 | 0.05 |
| 190 | pos_1266 | Thr Gln                                          | metab_296       | -           | 248.12 | 0.64 | M+H-H2O,<br>M+H    | C9H17N3O5  | 1.07 | 1.15 | 0.01 |
| 191 | pos_6457 | 2,3,4,5-Tetrahydro-2-<br>pyridinecarboxylic acid | metab_5929      | 73980-78-6  | 272.16 | 2.04 | 2M+NH4             | C6H9NO2    | 1.08 | 1.15 | 0.00 |
| 192 | neg_7245 | N2-Acetylornithine                               | metab_1422<br>8 | 1572591.00  | 173.09 | 1.70 | M-H                | C7H14N2O3  | 1.20 | 1.15 | 0.02 |
| 193 | neg_61   | Ser-Leu                                          | metab_1306<br>7 | 6665-16-3   | 217.12 | 2.68 | M-H, M+Cl,<br>2M-H | C9H18N2O4  | 1.20 | 1.15 | 0.03 |
| 194 | neg_7520 | N2-Succinyl-L-ornithine                          | metab_1450<br>1 | 899816-95-6 | 231.10 | 1.01 | M-H                | C9H16N2O5  | 1.07 | 1.15 | 0.04 |
| 195 | pos_2833 | Ile Glu Val                                      | metab_1986      | -           | 360.21 | 3.36 | M+H                | C16H29N3O6 | 1.12 | 1.15 | 0.00 |
| 196 | neg_1971 | Histidylarginine                                 | metab_8639      | 77369-21-2  | 332.15 | 2.44 | M+Na-2H            | C12H21N7O3 | 1.22 | 1.15 | 0.01 |
| 197 | pos_2516 | Val Leu                                          | metab_1637      | -           | 231.17 | 2.67 | M+H                | C11H22N2O3 | 1.10 | 1.16 | 0.02 |
| 198 | pos_6913 | Tyr Lys                                          | metab_6414      | -           | 310.18 | 1.41 | M+H                | C15H23N3O4 | 1.12 | 1.16 | 0.00 |
| 199 | pos_7515 | D-Citrulline                                     | metab_7053      | -           | 158.09 | 0.57 | M+H-H2O            | C6H13N3O3  | 1.07 | 1.16 | 0.01 |
| 200 | pos_2238 | Ala Ile                                          | metab_1339      | -           | 203.14 | 2.12 | M+H                | C9H18N2O3  | 1.08 | 1.16 | 0.02 |
| 201 | pos_5251 | Illicifolinoside A                               | metab_4613      | -           | 546.28 | 4.00 | 2M+NH4             | C11H20O7   | 1.10 | 1.16 | 0.00 |
| 202 | neg_6755 | Deca-2,5,8-<br>trienedioylcarnitine              | metab_1373<br>6 | -           | 360.14 | 2.44 | M+Na-2H            | C17H25NO6  | 1.14 | 1.16 | 0.01 |



|     |          |                                                       |             |             |        |      |                      |            |      |      |      |
|-----|----------|-------------------------------------------------------|-------------|-------------|--------|------|----------------------|------------|------|------|------|
| 203 | neg_1232 | 2-Amino-4-[(2-hydroxy-1-oxopropyl)amino]butanoic acid | metab_7916  | 38710-35-9  | 189.09 | 0.79 | M-H                  | C7H14N2O4  | 1.05 | 1.16 | 0.02 |
| 204 | pos_6573 | Ecgonine Methyl Ester                                 | metab_6056  | 1915211.00  | 217.15 | 1.95 | M+NH4                | C10H17NO3  | 1.07 | 1.16 | 0.02 |
| 205 | neg_723  | Threonylleucine                                       | metab_14219 | 50299-12-2  | 231.13 | 2.84 | M-H2O-H, M-H         | C10H20N2O4 | 1.18 | 1.16 | 0.03 |
| 206 | pos_465  | Glycyl-leucine                                        | metab_3952  | 869-19-2    | 189.12 | 2.17 | M+H, 2M+H            | C8H16N2O3  | 1.13 | 1.16 | 0.01 |
| 207 | neg_2116 | Asparaginyllisoleucine                                | metab_8786  | 438533-59-6 | 244.13 | 2.71 | M-H                  | C10H19N3O4 | 1.22 | 1.16 | 0.02 |
| 208 | neg_3074 | LF                                                    | metab_9806  | 424904.00   | 277.16 | 4.40 | M-H                  | C15H22N2O3 | 1.18 | 1.16 | 0.04 |
| 209 | neg_2325 | Valylisoleucine                                       | metab_9009  | 20556-14-3  | 229.16 | 3.03 | M-H                  | C11H22N2O3 | 1.18 | 1.16 | 0.02 |
| 210 | pos_480  | Thr Ile                                               | metab_4117  | -           | 233.15 | 2.27 | M+H, M+Na            | C10H20N2O4 | 1.12 | 1.16 | 0.02 |
| 211 | pos_412  | Thr Glu Leu Lys                                       | metab_3387  | -           | 531.31 | 1.91 | M+H, M+ACN+H         | C21H39N5O8 | 1.14 | 1.16 | 0.01 |
| 212 | pos_6868 | Valylarginine                                         | metab_6363  | 37682-75-0  | 274.19 | 1.55 | M+H                  | C11H23N5O3 | 1.06 | 1.16 | 0.02 |
| 213 | neg_6362 | (S)-3-Hydroxy-N-methylcoclaurine                      | metab_13330 | -           | 675.30 | 2.96 | 2M+FA-H              | C18H21NO4  | 1.13 | 1.16 | 0.01 |
| 214 | pos_2635 | Agar                                                  | metab_1767  | 9002-18-0   | 319.14 | 2.93 | M+H-H2O              | C14H24O9   | 1.05 | 1.16 | 0.00 |
| 215 | pos_5951 | Methohexital                                          | metab_5387  | 151-83-7    | 295.16 | 2.74 | M+CH3OH+H            | C14H18N2O3 | 1.03 | 1.16 | 0.03 |
| 216 | neg_5829 | N-Acetyl-leukotriene E4                               | metab_12771 | 80115-95-3  | 526.25 | 3.72 | M+FA-H               | C25H39NO6S | 1.15 | 1.16 | 0.01 |
| 217 | neg_3231 | Phenylalanyllisoleucine                               | metab_9979  | 22951-94-6  | 601.32 | 4.81 | 2M+FA-H              | C15H22N2O3 | 1.22 | 1.16 | 0.00 |
| 218 | neg_45   | Gamma-Glu-Leu                                         | metab_11331 | 2566-39-4   | 259.13 | 2.10 | M-H, M+FA-H, M-H2O-H | C11H20N2O5 | 1.26 | 1.16 | 0.01 |
| 219 | pos_1483 | Asn Lys                                               | metab_534   | -           | 261.16 | 0.50 | M+H                  | C10H20N4O4 | 1.09 | 1.16 | 0.01 |
| 220 | neg_1564 | N-alpha-Acetyl-L-lysine                               | metab_8237  | 1946-82-3   | 187.11 | 1.61 | M-H                  | C8H16N2O3  | 1.25 | 1.16 | 0.01 |

|     |          |                                    |                 |            |        |      |                        |                                                                 |      |      |      |
|-----|----------|------------------------------------|-----------------|------------|--------|------|------------------------|-----------------------------------------------------------------|------|------|------|
| 221 | neg_6108 | Ptaquiloside                       | metab_1307<br>7 | 87625-62-5 | 379.17 | 3.26 | M-H <sub>2</sub> O-H   | C <sub>20</sub> H <sub>30</sub> O <sub>8</sub>                  | 1.10 | 1.16 | 0.02 |
| 222 | neg_3558 | Apixaban                           | metab_1033<br>6 | -          | 458.19 | 5.66 | M-H                    | C <sub>25</sub> H <sub>25</sub> N <sub>5</sub> O <sub>4</sub>   | 1.12 | 1.16 | 0.00 |
| 223 | pos_5407 | Gamma-Glutamylisoleucine           | metab_4785      | 23632-83-9 | 243.13 | 3.67 | M+H-H <sub>2</sub> O   | C <sub>11</sub> H <sub>20</sub> N <sub>2</sub> O <sub>5</sub>   | 1.12 | 1.16 | 0.01 |
| 224 | pos_5631 | Val Ile Val                        | metab_5032      | -          | 330.24 | 3.26 | M+H                    | C <sub>16</sub> H <sub>31</sub> N <sub>3</sub> O <sub>4</sub>   | 1.08 | 1.16 | 0.00 |
| 225 | neg_7846 | N-Acetyl-b-glucosaminylamine       | metab_1481<br>6 | -          | 219.10 | 0.66 | M-H                    | C <sub>8</sub> H <sub>16</sub> N <sub>2</sub> O <sub>5</sub>    | 1.12 | 1.17 | 0.01 |
| 226 | pos_5905 | PA(PGF2alpha/19:2(10Z,13Z))        | metab_5336      | -          | 415.23 | 2.81 | M+2Na                  | C <sub>42</sub> H <sub>73</sub> O <sub>11</sub> P               | 1.08 | 1.17 | 0.01 |
| 227 | pos_1659 | Gamma-glutamyl-L-putrescine        | metab_718       | -          | 218.15 | 0.80 | M+H                    | C <sub>9</sub> H <sub>19</sub> N <sub>3</sub> O <sub>3</sub>    | 1.07 | 1.17 | 0.02 |
| 228 | neg_8096 | E-10-Hydroxydesmethylnortriptyline | metab_1507<br>2 | -          | 300.12 | 0.51 | M+Cl                   | C <sub>18</sub> H <sub>19</sub> NO                              | 1.02 | 1.17 | 0.04 |
| 229 | pos_4911 | Leu Leu Leu                        | metab_4239      | -          | 358.27 | 4.88 | M+H                    | C <sub>18</sub> H <sub>35</sub> N <sub>3</sub> O <sub>4</sub>   | 1.08 | 1.17 | 0.00 |
| 230 | pos_5748 | Phe Met                            | metab_5161      | -          | 297.13 | 3.08 | M+H                    | C <sub>14</sub> H <sub>20</sub> N <sub>2</sub> O <sub>3</sub> S | 1.09 | 1.17 | 0.00 |
| 231 | pos_7108 | Arg Val                            | metab_6619      | -          | 274.19 | 0.99 | M+H                    | C <sub>11</sub> H <sub>23</sub> N <sub>5</sub> O <sub>3</sub>   | 1.11 | 1.17 | 0.02 |
| 232 | pos_1463 | Lysyl-Lysine                       | metab_512       | 13184-13-9 | 138.11 | 0.48 | M+2H                   | C <sub>12</sub> H <sub>26</sub> N <sub>4</sub> O <sub>3</sub>   | 1.10 | 1.17 | 0.00 |
| 233 | neg_6270 | CD 1790                            | metab_1323<br>0 | -          | 494.19 | 3.09 | M+Na-2H                | C <sub>25</sub> H <sub>27</sub> N <sub>7</sub> O <sub>3</sub>   | 1.24 | 1.17 | 0.00 |
| 234 | pos_3238 | Ile Leu Ile                        | metab_2433      | -          | 358.27 | 4.58 | M+H                    | C <sub>18</sub> H <sub>35</sub> N <sub>3</sub> O <sub>4</sub>   | 1.08 | 1.17 | 0.00 |
| 235 | pos_6783 | Arg Leu                            | metab_6273      | -          | 288.20 | 1.65 | M+H                    | C <sub>12</sub> H <sub>25</sub> N <sub>5</sub> O <sub>3</sub>   | 1.24 | 1.17 | 0.00 |
| 236 | pos_5020 | Cyclo(Leu-Phe)                     | metab_4361      | -          | 293.19 | 4.53 | M+CH <sub>3</sub> OH+H | C <sub>15</sub> H <sub>20</sub> N <sub>2</sub> O <sub>2</sub>   | 1.03 | 1.17 | 0.00 |

|     |          |                                             |                 |                         |        |      |                       |            |      |      |      |
|-----|----------|---------------------------------------------|-----------------|-------------------------|--------|------|-----------------------|------------|------|------|------|
| 237 | pos_178  | Ser Leu                                     | metab_847       | -                       | 219.13 | 2.18 | M+H, M+Na,<br>M+H-H2O | C9H18N2O4  | 1.16 | 1.17 | 0.02 |
| 238 | neg_7867 | Methoxamine                                 | metab_1483<br>3 | 390-28-3                | 232.09 | 0.63 | M+Na-2H               | C11H17NO3  | 1.19 | 1.17 | 0.01 |
| 239 | neg_7036 | Arginylleucine                              | metab_1402<br>6 | 1188-24-5               | 286.19 | 2.06 | M-H                   | C12H25N5O3 | 1.18 | 1.17 | 0.02 |
| 240 | neg_2523 | L-Coprine                                   | metab_9211      | 58919-61-2              | 403.18 | 3.32 | 2M-H                  | C8H14N2O4  | 1.27 | 1.17 | 0.01 |
| 241 | pos_1965 | Diaminopimelic acid                         | metab_1047      | 583-93-7                | 232.13 | 1.60 | M+ACN+H               | C7H14N2O4  | 1.15 | 1.17 | 0.00 |
| 242 | pos_808  | Ile Leu Phe                                 | metab_7435      | -                       | 392.25 | 4.95 | M+H, M+Na             | C21H33N3O4 | 1.13 | 1.17 | 0.00 |
| 243 | pos_597  | Tyr Leu                                     | metab_5407      | -                       | 295.16 | 2.99 | M+H, M+Na             | C15H22N2O4 | 1.19 | 1.17 | 0.01 |
| 244 | pos_3176 | Icariside B8                                | metab_2364      | 126176-78-1             | 421.24 | 4.34 | M+CH3OH+<br>H         | C19H32O8   | 1.09 | 1.17 | 0.01 |
| 245 | neg_1466 | N2-Acetyl-L-ornithine                       | metab_8137      | 1572591.00              | 173.09 | 1.27 | M-H                   | C7H14N2O3  | 1.15 | 1.17 | 0.04 |
| 246 | neg_2714 | Naftifine                                   | metab_9418      | 65472-88-0              | 332.16 | 3.72 | M+FA-H                | C21H21N    | 1.14 | 1.17 | 0.00 |
| 247 | pos_1265 | Glutaminyllalanine                          | metab_295       | 16874-70-7              | 218.11 | 0.62 | M+H, M+K              | C8H15N3O4  | 1.13 | 1.17 | 0.01 |
| 248 | pos_7408 | Meso-2,6-<br>Diaminoheptanedioate           | metab_7667      | 583-93-7                | 191.10 | 0.64 | M+H                   | C7H14N2O4  | 1.06 | 1.17 | 0.02 |
| 249 | neg_2597 | Leucyl-leucine                              | metab_9292      | 2883-36-<br>5;3303-31-9 | 243.17 | 3.49 | M-H                   | C12H24N2O3 | 1.17 | 1.17 | 0.03 |
| 250 | neg_7205 | Acetylhomoserine                            | metab_1419<br>9 | 7540-67-2               | 381.15 | 1.78 | 2M+Hac-H              | C6H11NO4   | 1.12 | 1.17 | 0.02 |
| 251 | pos_548  | Val Gln Val                                 | metab_4864      | -                       | 345.21 | 2.65 | M+H, M+Na             | C15H28N4O5 | 1.12 | 1.17 | 0.01 |
| 252 | neg_5306 | Blumenol C O-[apiosyl-<br>(1->6)-glucoside] | metab_1220<br>4 | 177261-68-6             | 539.23 | 4.63 | M+Cl                  | C24H40O11  | 1.09 | 1.17 | 0.02 |
| 253 | pos_2106 | Ile Ala                                     | metab_1197      | -                       | 203.14 | 1.90 | M+H                   | C9H18N2O3  | 1.16 | 1.17 | 0.01 |
| 254 | pos_5684 | Statine                                     | metab_5090      | -                       | 217.15 | 3.17 | M+ACN+H               | C8H17NO3   | 1.07 | 1.17 | 0.01 |
| 255 | pos_628  | Ile Ile                                     | metab_5745      | -                       | 245.19 | 3.22 | M+H, M+Na             | C12H24N2O3 | 1.15 | 1.18 | 0.02 |

|     |          |                                                                     |             |                               |        |      |                   |             |      |      |      |
|-----|----------|---------------------------------------------------------------------|-------------|-------------------------------|--------|------|-------------------|-------------|------|------|------|
| 256 | pos_656  | Leu Leu                                                             | metab_6041  | -                             | 245.19 | 3.42 | M+H, M+Na         | C12H24N2O3  | 1.16 | 1.18 | 0.01 |
| 257 | neg_5855 | Isoleucyl-Isoleucine                                                | metab_12800 | -                             | 243.17 | 3.68 | M-H               | C12H24N2O3  | 1.15 | 1.18 | 0.04 |
| 258 | pos_102  | (2S,3R)-2-Amino-3-[(2S)-2-amino-3-hydroxypropanoyl]oxybutanoic acid | metab_24    | -                             | 207.10 | 0.62 | M+H, M+K, M+H-H2O | C7H14N2O5   | 1.05 | 1.18 | 0.04 |
| 259 | pos_4851 | Leu Phe Leu                                                         | metab_4172  | -                             | 392.25 | 5.10 | M+H               | C21H33N3O4  | 1.12 | 1.18 | 0.00 |
| 260 | neg_2112 | Allysine                                                            | metab_15407 | 1962-83-0;6665-12-9           | 349.16 | 2.69 | 2M+Hac-H          | C6H11NO3    | 1.13 | 1.18 | 0.02 |
| 261 | neg_1237 | Xylobiose                                                           | metab_7921  | 6860-47-5                     | 845.28 | 0.79 | 3M-H              | C10H18O9    | 1.11 | 1.18 | 0.04 |
| 262 | pos_5506 | Glutathione                                                         | metab_5830  | 15718-51-1;70-18-8;27025-41-8 | 308.09 | 1.21 | M+H               | C10H17N3O6S | 1.19 | 1.18 | 0.02 |
| 263 | neg_7101 | Gaboxadol                                                           | metab_14096 | 64603-91-4                    | 185.06 | 1.96 | M+FA-H            | C6H8N2O2    | 1.08 | 1.18 | 0.03 |
| 264 | pos_676  | PGP(PGJ2/18:3(9Z,12Z,15Z))                                          | metab_6251  | -                             | 903.44 | 3.55 | M+H, M+Na         | C44H72O15P2 | 1.20 | 1.18 | 0.01 |
| 265 | pos_2251 | (2S)-5-(Diaminomethylideneamino)-2-(hydroxyamino)pentanoic Acid     | metab_1352  | -                             | 422.25 | 2.14 | 2M+ACN+H          | C6H14N4O3   | 1.12 | 1.18 | 0.02 |
| 266 | pos_6164 | Val Ile                                                             | metab_5621  | -                             | 231.17 | 2.44 | M+H               | C11H22N2O3  | 1.16 | 1.18 | 0.01 |
| 267 | pos_1537 | Arg Ser                                                             | metab_591   | -                             | 262.15 | 0.58 | M+H               | C9H19N5O4   | 1.06 | 1.18 | 0.04 |
| 268 | neg_6144 | Perindopril                                                         | metab_13115 | 107133-36-8;82834-16-0        | 389.20 | 3.22 | M+Na-2H           | C19H32N2O5  | 1.27 | 1.18 | 0.01 |

|     |          |                                |             |             |        |      |                    |              |      |      |      |
|-----|----------|--------------------------------|-------------|-------------|--------|------|--------------------|--------------|------|------|------|
| 269 | pos_359  | L-Dopa                         | metab_2822  | 59-92-7     | 198.08 | 1.60 | M+H, M+NH4         | C9H11NO4     | 1.10 | 1.18 | 0.00 |
| 270 | pos_1319 | Val Arg                        | metab_355   | -           | 274.19 | 0.69 | M+2H, M+H          | C11H23N5O3   | 1.12 | 1.18 | 0.03 |
| 271 | pos_6173 | Hydroxyzine                    | metab_5631  | 68-88-2     | 375.19 | 2.43 | M+H                | C21H27ClN2O2 | 1.21 | 1.18 | 0.00 |
| 272 | pos_5545 | Estriol-16-Glucuronide         | metab_4936  | 1852-50-2   | 429.19 | 3.40 | M+H-2H2O           | C24H32O9     | 1.09 | 1.18 | 0.01 |
| 273 | neg_6183 | Metipranolol                   | metab_13148 | 22664-55-7  | 330.17 | 3.18 | M+Na-2H            | C17H27NO4    | 1.26 | 1.18 | 0.02 |
| 274 | pos_176  | Asn Leu                        | metab_826   | -           | 246.14 | 2.19 | M+H, M+Na, M+H-H2O | C10H19N3O4   | 1.20 | 1.18 | 0.02 |
| 275 | pos_1770 | 7-Epijasmonic acid             | metab_838   | -           | 233.11 | 1.00 | M+Na               | C12H18O3     | 1.10 | 1.18 | 0.02 |
| 276 | pos_2517 | Candoxatrilat                  | metab_1638  | 123898-42-0 | 422.21 | 2.67 | M+Na               | C20H33NO7    | 1.10 | 1.18 | 0.01 |
| 277 | pos_7017 | Met Arg                        | metab_6522  | -           | 306.16 | 1.13 | M+H                | C11H23N5O3S  | 1.05 | 1.18 | 0.04 |
| 278 | pos_3036 | Phe Leu                        | metab_2210  | -           | 279.17 | 3.90 | M+H                | C15H22N2O3   | 1.20 | 1.18 | 0.02 |
| 279 | neg_5777 | Pisumionoside                  | metab_12716 | 371113-06-3 | 449.20 | 3.80 | M+FA-H             | C19H32O9     | 1.16 | 1.18 | 0.01 |
| 280 | pos_7471 | Meclizine                      | metab_7005  | 569-65-3    | 432.22 | 0.59 | M+ACN+H            | C25H27ClN2   | 1.15 | 1.19 | 0.01 |
| 281 | neg_2052 | Valylmethionine                | metab_8726  | 14486-09-0  | 247.11 | 2.58 | M-H                | C10H20N2O3S  | 1.18 | 1.19 | 0.03 |
| 282 | neg_6072 | Trandolaprilat                 | metab_13039 | -           | 401.20 | 3.32 | M-H                | C22H30N2O5   | 1.28 | 1.19 | 0.01 |
| 283 | pos_1893 | 3"-deamino-3"-oxonicotianamine | metab_968   | -           | 319.14 | 1.30 | M+NH4              | C12H17N2O7-  | 1.17 | 1.19 | 0.01 |
| 284 | pos_2294 | (-)-Slaframine                 | metab_1396  | 20084-93-9  | 231.17 | 2.25 | M+CH3OH+H          | C10H18N2O2   | 1.18 | 1.19 | 0.01 |
| 285 | neg_2980 | Merodesmosine                  | metab_9705  | 17096-97-8  | 383.23 | 4.23 | M-H2O-H            | C18H34N4O6   | 1.23 | 1.19 | 0.01 |
| 286 | pos_5906 | Beta-Leucine                   | metab_5337  | 5699-54-7   | 326.21 | 2.81 | 2M+ACN+Na          | C6H13NO2     | 1.17 | 1.19 | 0.00 |
| 287 | neg_239  | Gamma-Glutamylvaline           | metab_9075  | 2746-34-1   | 245.11 | 1.23 | M-H2O-H, M-H       | C10H18N2O5   | 1.27 | 1.19 | 0.03 |
| 288 | pos_6738 | Tazolol                        | metab_6228  | -           | 474.22 | 1.79 | 2M+ACN+H           | C9H16N2O2S   | 1.18 | 1.19 | 0.00 |

|     |          |                               |                 |            |        |      |               |             |      |      |      |
|-----|----------|-------------------------------|-----------------|------------|--------|------|---------------|-------------|------|------|------|
| 289 | neg_2365 | Ramiprilat                    | metab_9050      | 87269-97-4 | 387.19 | 3.10 | M-H           | C21H28N2O5  | 1.31 | 1.19 | 0.01 |
| 290 | pos_5019 | Asp Phe Leu                   | metab_4359      | -          | 394.20 | 4.54 | M+H           | C19H27N3O6  | 1.02 | 1.19 | 0.01 |
| 291 | neg_2428 | Cinnassiol D2 glucoside       | metab_9115      | -          | 529.26 | 3.18 | M-H           | C26H42O11   | 1.27 | 1.19 | 0.01 |
| 292 | neg_2174 | Monopropionylcadaverine       | metab_8847      | -          | 157.13 | 2.80 | M-H           | C8H18N2O    | 1.11 | 1.19 | 0.02 |
| 293 | neg_1527 | Histidinyl-Leucine            | metab_8201      | 7763-65-7  | 267.15 | 1.48 | M-H           | C12H20N4O3  | 1.27 | 1.19 | 0.03 |
| 294 | pos_5261 | Leu Trp                       | metab_4624      | -          | 318.18 | 3.99 | M+H           | C17H23N3O3  | 1.10 | 1.19 | 0.02 |
| 295 | neg_2242 | Ribalinium                    | metab_8921      | 6883-22-3  | 335.14 | 2.90 | M+FA-H        | C16H20NO4+  | 1.28 | 1.19 | 0.01 |
| 296 | pos_2056 | 3-Hydroxy-L-proline           | metab_1142      | 876067.00  | 304.15 | 1.82 | 2M+ACN+H      | C5H9NO3     | 1.12 | 1.19 | 0.01 |
| 297 | neg_2339 | Delta-Hydroxylysylnorleucine  | metab_9023      | -          | 272.16 | 3.06 | M-H2O-H       | C12H25N3O5  | 1.31 | 1.19 | 0.01 |
| 298 | pos_6041 | Dactimicin                    | metab_5487      | 73196-97-1 | 496.29 | 2.60 | M+ACN+Na      | C18H36N6O6  | 1.16 | 1.19 | 0.00 |
| 299 | neg_7930 | Metanephrene                  | metab_1489<br>2 | 5001-33-2  | 218.08 | 0.58 | M+Na-2H       | C10H15NO3   | 1.18 | 1.19 | 0.01 |
| 300 | pos_6788 | Methionyl-Serine              | metab_6278      | -          | 237.09 | 1.64 | M+H           | C8H16N2O4S  | 1.15 | 1.19 | 0.01 |
| 301 | pos_5300 | Val Met Ile                   | metab_4668      | -          | 362.21 | 3.90 | M+H           | C16H31N3O4S | 1.14 | 1.19 | 0.00 |
| 302 | pos_1257 | Asn Thr                       | metab_286       | -          | 234.11 | 0.62 | M+H, M+K      | C8H15N3O5   | 1.17 | 1.19 | 0.01 |
| 303 | pos_7415 | Val His                       | metab_6944      | -          | 255.14 | 0.63 | M+H           | C11H18N4O3  | 1.18 | 1.19 | 0.01 |
| 304 | pos_5266 | Kainic acid                   | metab_4629      | 487-79-6   | 277.12 | 3.98 | M+ACN+Na      | C10H15NO4   | 1.10 | 1.19 | 0.01 |
| 305 | pos_2828 | N-Acetylserotonin             | metab_1980      | 1210-83-9  | 251.14 | 3.35 | M+CH3OH+<br>H | C12H14N2O2  | 1.04 | 1.19 | 0.01 |
| 306 | neg_8120 | Histidinyl-Lysine             | metab_1509<br>8 | 37700-85-9 | 282.16 | 0.50 | M-H           | C12H21N5O3  | 1.19 | 1.19 | 0.02 |
| 307 | neg_5154 | Glu-val-phe                   | metab_1203<br>9 | -          | 392.18 | 4.98 | M-H           | C19H27N3O6  | 1.11 | 1.19 | 0.04 |
| 308 | pos_5794 | N(2)-phenylacetyl-L-glutamate | metab_5212      | -          | 306.14 | 3.00 | M+ACN+H       | C13H16N2O4  | 1.09 | 1.19 | 0.02 |
| 309 | neg_1835 | Edivoxetine                   | metab_8499      | -          | 374.16 | 2.10 | M+Cl          | C18H26FNO4  | 1.35 | 1.19 | 0.00 |

|     |          |                                                                  |             |             |        |      |                             |            |      |      |      |
|-----|----------|------------------------------------------------------------------|-------------|-------------|--------|------|-----------------------------|------------|------|------|------|
| 310 | neg_1022 | Lysylarginine                                                    | metab_7702  | 29586-66-1  | 301.20 | 0.49 | M-H                         | C12H26N6O3 | 1.24 | 1.19 | 0.01 |
| 311 | neg_6440 | Leucyl-Valine                                                    | metab_13414 | -           | 229.16 | 2.87 | M-H                         | C11H22N2O3 | 1.26 | 1.19 | 0.02 |
| 312 | neg_2782 | N-[(3a,5b,7a)-3-hydroxy-24-oxo-7-(sulfooxy)cholan-24-yl]-Glycine | metab_9491  | 67030-55-1  | 574.27 | 3.84 | M+FA-H                      | C26H43NO8S | 1.19 | 1.20 | 0.02 |
| 313 | neg_7048 | Valylcysteine                                                    | metab_14038 | 160070-15-5 | 219.08 | 2.04 | M-H                         | C8H16N2O3S | 1.20 | 1.20 | 0.03 |
| 314 | pos_1934 | 2-Keto-6-acetamidocaproate                                       | metab_1013  | -           | 205.12 | 1.50 | M+NH4                       | C8H13NO4   | 1.21 | 1.20 | 0.02 |
| 315 | pos_420  | Glutaminyityrosine                                               | metab_3471  | 457662-02-1 | 342.17 | 1.94 | M+NH4,<br>M+CH3OH+<br>H     | C14H19N3O5 | 1.13 | 1.20 | 0.02 |
| 316 | pos_2391 | Asn Phe                                                          | metab_1500  | -           | 280.13 | 2.44 | M+H                         | C13H17N3O4 | 1.10 | 1.20 | 0.03 |
| 317 | pos_6571 | Herculin                                                         | metab_6054  | -           | 274.21 | 1.95 | M+Na                        | C16H29NO   | 1.21 | 1.20 | 0.00 |
| 318 | pos_4666 | Zolmitriptan                                                     | metab_3970  | 139264-17-8 | 616.36 | 5.62 | 2M+ACN+H                    | C16H21N3O2 | 1.00 | 1.20 | 0.03 |
| 319 | pos_2033 | Glycyl-Methionine                                                | metab_1121  | -           | 207.08 | 1.72 | M+H                         | C7H14N2O3S | 1.11 | 1.20 | 0.03 |
| 320 | pos_167  | Ala Pro Val                                                      | metab_729   | -           | 318.20 | 2.03 | M+H, 2M+K,<br>M+CH3OH+<br>H | C13H23N3O4 | 1.22 | 1.20 | 0.00 |
| 321 | pos_1849 | Ile Arg                                                          | metab_920   | -           | 288.20 | 1.16 | M+H                         | C12H25N5O3 | 1.29 | 1.20 | 0.00 |
| 322 | neg_6652 | Ala-Leu                                                          | metab_13635 | 3303-34-2   | 201.12 | 2.58 | M-H                         | C9H18N2O3  | 1.29 | 1.20 | 0.02 |
| 323 | neg_3269 | Cholylphenylalanine                                              | metab_10020 | -           | 592.30 | 4.91 | M+K-2H                      | C33H49NO6  | 1.34 | 1.20 | 0.00 |
| 324 | neg_5352 | LysoPE(0:0/20:1(11Z))                                            | metab_12255 | -           | 528.30 | 4.51 | M+Na-2H                     | C25H50NO7P | 1.29 | 1.20 | 0.01 |

|     |          |                                           |                 |                         |        |      |                     |            |      |      |      |
|-----|----------|-------------------------------------------|-----------------|-------------------------|--------|------|---------------------|------------|------|------|------|
| 325 | pos_5415 | Ile Phe                                   | metab_4794      | -                       | 279.17 | 3.66 | M+H                 | C15H22N2O3 | 1.13 | 1.20 | 0.03 |
| 326 | pos_528  | 1-Octanesulfonic acid                     | metab_4644      | -                       | 389.20 | 2.49 | M+ACN+Na,<br>2M+H   | C8H18O3S   | 1.24 | 1.20 | 0.00 |
| 327 | pos_583  | Ile Leu                                   | metab_5252      | -                       | 245.19 | 2.91 | M+H, M+Na           | C12H24N2O3 | 1.19 | 1.20 | 0.02 |
| 328 | pos_5601 | Ceanothine E                              | metab_4999      | 23926-98-9              | 632.32 | 3.31 | M+ACN+Na            | C34H40N4O4 | 1.10 | 1.20 | 0.01 |
| 329 | pos_7424 | Dihydrothymine                            | metab_6954      | 19140-80-<br>8;696-04-8 | 257.12 | 0.62 | 2M+H                | C5H8N2O2   | 1.14 | 1.20 | 0.03 |
| 330 | neg_1847 | L-Leucyl-L-Alanine                        | metab_8512      | 7298-84-2               | 201.12 | 2.11 | M-H                 | C9H18N2O3  | 1.30 | 1.20 | 0.01 |
| 331 | neg_7798 | Hydroxypropyl-Gamma-glutamate             | metab_1476<br>4 | -                       | 304.12 | 0.69 | M+FA-H              | C10H17N3O5 | 1.17 | 1.20 | 0.04 |
| 332 | pos_2017 | Tyrosyl-Gamma-glutamate                   | metab_1104      | -                       | 310.14 | 1.68 | M+H                 | C14H19N3O5 | 1.11 | 1.20 | 0.03 |
| 333 | pos_5174 | Golotimod                                 | metab_4529      | -                       | 316.13 | 4.18 | M+H-H2O             | C16H19N3O5 | 1.09 | 1.20 | 0.00 |
| 334 | pos_204  | Lys His                                   | metab_1125      | -                       | 284.17 | 0.48 | M+2H, M+H           | C12H21N5O3 | 1.16 | 1.20 | 0.01 |
| 335 | pos_5774 | Deferoxamine                              | metab_5190      | 70-51-9                 | 543.35 | 3.03 | M+H-H2O             | C25H48N6O8 | 1.16 | 1.20 | 0.01 |
| 336 | neg_953  | Abeado                                    | metab_1535<br>3 | -                       | 370.16 | 4.21 | M+Na-2H,<br>2M+FA-H | C15H23N7O3 | 1.15 | 1.20 | 0.03 |
| 337 | neg_6330 | Pexacerfont                               | metab_1329<br>6 | -                       | 361.17 | 3.01 | M+Na-2H             | C18H24N6O  | 1.28 | 1.20 | 0.00 |
| 338 | neg_2710 | Sulfinalol                                | metab_9414      | -                       | 376.16 | 3.71 | M-H                 | C20H27NO4S | 1.16 | 1.20 | 0.01 |
| 339 | neg_3476 | Goshonoside F4                            | metab_1024<br>6 | 90851-27-7              | 629.35 | 5.55 | M-H                 | C32H54O12  | 1.21 | 1.20 | 0.03 |
| 340 | neg_1905 | Valylvaline                               | metab_8569      | 3918-94-3               | 215.14 | 2.29 | M-H                 | C10H20N2O3 | 1.28 | 1.20 | 0.03 |
| 341 | pos_2795 | N1-trans-Feruloylagmatine                 | metab_1943      | -                       | 651.30 | 3.28 | 2M+K                | C15H22N4O3 | 1.21 | 1.20 | 0.00 |
| 342 | pos_3175 | N-(8-Amino-1-carboxyoctyl)-alanyl-proline | metab_2363      | -                       | 399.26 | 4.34 | M+ACN+H             | C17H31N3O5 | 1.21 | 1.20 | 0.00 |
| 343 | pos_2102 | Thr Met                                   | metab_1193      | -                       | 251.11 | 1.89 | M+H                 | C9H18N2O4S | 1.17 | 1.20 | 0.01 |



|     |          |                                                     |                 |                        |        |      |                    |            |      |      |      |
|-----|----------|-----------------------------------------------------|-----------------|------------------------|--------|------|--------------------|------------|------|------|------|
| 344 | neg_648  | LysoPA(i-13:0/0:0)                                  | metab_1345<br>2 | -                      | 389.17 | 2.41 | M+Na-2H,<br>M+K-2H | C16H33O7P  | 1.33 | 1.20 | 0.01 |
| 345 | pos_2446 | 2,6-Diamino-5-<br>hydroxyhexanoic acid              | metab_1561      | 1190-94-9              | 347.19 | 2.53 | 2M+Na              | C6H14N2O3  | 1.23 | 1.20 | 0.00 |
| 346 | pos_7485 | Arg Gln                                             | metab_7020      | -                      | 303.18 | 0.58 | M+H                | C11H22N6O4 | 1.11 | 1.20 | 0.04 |
| 347 | neg_5989 | Val-pro-pro                                         | metab_1294<br>6 | -                      | 356.18 | 3.47 | M+FA-H             | C15H25N3O4 | 1.17 | 1.20 | 0.01 |
| 348 | pos_1894 | Ile Asp Lys                                         | metab_969       | -                      | 375.22 | 1.30 | M+H                | C16H30N4O6 | 1.20 | 1.20 | 0.01 |
| 349 | pos_537  | Thr Glu Leu                                         | metab_4744      | -                      | 362.19 | 2.59 | M+H, 2M+Na         | C15H27N3O7 | 1.32 | 1.20 | 0.00 |
| 350 | neg_7310 | Leucyl-Serine                                       | metab_1429<br>0 | -                      | 217.12 | 1.52 | M-H                | C9H18N2O4  | 1.36 | 1.21 | 0.01 |
| 351 | neg_2263 | Erythrohydrobupropion                               | metab_8944      | -                      | 541.26 | 2.93 | 2M+Hac-H           | C13H20ClNO | 1.28 | 1.21 | 0.00 |
| 352 | pos_3189 | Madecassoside                                       | metab_2378      | 34540-22-2             | 499.25 | 4.38 | M+H+Na             | C48H78O20  | 1.14 | 1.21 | 0.02 |
| 353 | pos_7664 | Arg Lys                                             | metab_7217      | -                      | 303.21 | 0.51 | M+H                | C12H26N6O3 | 1.22 | 1.21 | 0.01 |
| 354 | pos_2869 | Glutamylleucine                                     | metab_2024      | 5969-52-8              | 243.13 | 3.44 | M+H-H2O            | C11H20N2O5 | 1.19 | 1.21 | 0.01 |
| 355 | neg_5578 | Lefamulin                                           | metab_1250<br>0 | -                      | 506.30 | 4.13 | M-H                | C28H45NO5S | 1.38 | 1.21 | 0.00 |
| 356 | pos_1185 | Val Pro Asp                                         | metab_206       | -                      | 330.17 | 2.02 | M+H,<br>M+ACN+H    | C14H23N3O6 | 1.15 | 1.21 | 0.01 |
| 357 | neg_1460 | (4S,6R)-p-Mentha-1,8-<br>diene-6,7-diol 7-glucoside | metab_8134      | 402593-54-8            | 351.14 | 1.24 | M+Na-2H            | C16H26O7   | 1.20 | 1.21 | 0.02 |
| 358 | pos_1538 | Asn Arg                                             | metab_592       | -                      | 289.16 | 0.58 | M+H                | C10H20N6O4 | 1.20 | 1.21 | 0.00 |
| 359 | neg_7325 | Leucyl-Lysine                                       | metab_1430<br>5 | -                      | 258.18 | 1.48 | M-H                | C12H25N3O3 | 1.34 | 1.21 | 0.02 |
| 360 | pos_2009 | L-Lysine                                            | metab_1095      | 10098-89-<br>2;56-87-1 | 129.10 | 1.65 | M+H-H2O            | C6H14N2O2  | 1.11 | 1.21 | 0.02 |
| 361 | pos_6929 | His Ala Val                                         | metab_6431      | -                      | 326.18 | 1.33 | M+H                | C14H23N5O4 | 1.26 | 1.21 | 0.00 |

|     |          |                                                   |             |             |        |      |              |            |      |      |      |
|-----|----------|---------------------------------------------------|-------------|-------------|--------|------|--------------|------------|------|------|------|
| 362 | pos_1635 | Lys Ser                                           | metab_692   | -           | 234.14 | 0.76 | M+H          | C9H19N3O4  | 1.09 | 1.21 | 0.05 |
| 363 | neg_2043 | Asparaginy-Leucine                                | metab_8716  | -           | 244.13 | 2.57 | M-H          | C10H19N3O4 | 1.34 | 1.21 | 0.01 |
| 364 | neg_6071 | Xanthine amine congener                           | metab_13038 | -           | 463.19 | 3.32 | M+Cl         | C21H28N6O4 | 1.30 | 1.21 | 0.00 |
| 365 | pos_6515 | Indicine-N-oxide                                  | metab_5993  | -           | 329.18 | 2.02 | 2M+3H2O+2H   | C15H25NO6  | 1.13 | 1.21 | 0.02 |
| 366 | pos_2713 | Leu Ile                                           | metab_1853  | -           | 245.19 | 3.11 | M+H          | C12H24N2O3 | 1.20 | 1.21 | 0.01 |
| 367 | neg_5624 | Protoveratrine                                    | metab_12550 | -           | 814.40 | 4.05 | M+Na-2H      | C41H63NO14 | 1.25 | 1.21 | 0.03 |
| 368 | pos_6129 | Isoleucylhydroxyproline                           | metab_5582  | 90965-80-3  | 286.18 | 2.49 | M+ACN+H      | C11H20N2O4 | 1.23 | 1.21 | 0.00 |
| 369 | pos_5565 | Milbemycin beta3                                  | metab_4958  | -           | 517.30 | 3.37 | M+Na         | C31H42O5   | 1.23 | 1.21 | 0.00 |
| 370 | neg_3443 | Pravastatin                                       | metab_10211 | 81093-37-0  | 405.22 | 5.49 | M-H2O-H      | C23H36O7   | 1.26 | 1.21 | 0.04 |
| 371 | pos_6979 | 2-Hydroxyphenethylamine                           | metab_6484  | 7568-93-6   | 338.18 | 1.18 | 2M+ACN+Na    | C8H11NO    | 1.14 | 1.21 | 0.04 |
| 372 | neg_824  | Ile Ser Val Asp                                   | metab_15211 | -           | 431.22 | 3.36 | M-H2O-H, M-H | C18H32N4O8 | 1.38 | 1.21 | 0.02 |
| 373 | pos_6351 | Xestoaminol C                                     | metab_5824  | -           | 274.21 | 2.18 | M+2Na-H      | C14H31NO   | 1.16 | 1.22 | 0.02 |
| 374 | neg_6634 | Glutaminylisoleucine                              | metab_13616 | 86416-45-7  | 258.15 | 2.60 | M-H          | C11H21N3O4 | 1.37 | 1.22 | 0.01 |
| 375 | pos_7188 | Ser Gln                                           | metab_6701  | -           | 234.11 | 0.86 | M+H          | C8H15N3O5  | 1.16 | 1.22 | 0.01 |
| 376 | neg_341  | Val Ala Ser Asp                                   | metab_10175 | -           | 389.17 | 2.08 | M-H2O-H, M-H | C15H26N4O8 | 1.32 | 1.22 | 0.01 |
| 377 | neg_238  | Ethyl 2-hydroxy-3-(3-indolyl)propanoate glucoside | metab_9066  | 143884-93-9 | 394.15 | 1.16 | M-H2O-H, M-H | C19H25NO8  | 1.32 | 1.22 | 0.01 |
| 378 | neg_334  | Histamine                                         | metab_10099 | 51-45-6     | 110.07 | 0.56 | M-H, M+FA-H  | C5H9N3     | 1.35 | 1.22 | 0.01 |

|     |          |                                                              |                 |                       |        |      |              |             |      |      |      |
|-----|----------|--------------------------------------------------------------|-----------------|-----------------------|--------|------|--------------|-------------|------|------|------|
| 379 | pos_2062 | Leu Lys Glu                                                  | metab_1149      | -                     | 389.24 | 1.83 | M+H          | C17H32N4O6  | 1.16 | 1.22 | 0.02 |
| 380 | neg_5653 | LysoPA(16:0/0:0)                                             | metab_1258<br>2 | -                     | 431.22 | 4.00 | M+Na-2H      | C19H39O7P   | 1.29 | 1.22 | 0.01 |
| 381 | neg_293  | Hydroxypropyl-Lysine                                         | metab_9652      | -                     | 258.15 | 1.82 | M-H2O-H, M-H | C11H21N3O4  | 1.44 | 1.22 | 0.01 |
| 382 | pos_6876 | Oxdralazine                                                  | metab_6372      | -                     | 444.28 | 1.52 | 2M+NH4       | C8H15N5O2   | 1.32 | 1.22 | 0.00 |
| 383 | neg_7876 | Alanyl-Gamma-glutamate                                       | metab_1483<br>9 | -                     | 216.10 | 0.62 | M-H          | C8H15N3O4   | 1.28 | 1.22 | 0.01 |
| 384 | neg_3138 | 24-Acetyl-25-cinnamoylvulgaroside                            | metab_9877      | 172616-89-6           | 589.32 | 4.55 | M-H2O-H      | C36H48O8    | 1.23 | 1.22 | 0.03 |
| 385 | neg_6112 | Benzamide, 3-(3-((2-(3,4-dihydroxyphenyl)ethyl)amino)butyl)- | metab_1308<br>2 | -                     | 349.15 | 3.25 | M+Na-2H      | C19H24N2O3  | 1.19 | 1.22 | 0.03 |
| 386 | neg_4874 | 3-(3-Indolyl)-2-oxopropanoic acid                            | metab_1172<br>9 | 392-12-1              | 202.05 | 5.64 | M-H          | C11H9NO3    | 1.13 | 1.22 | 0.02 |
| 387 | neg_1994 | Serylleucine                                                 | metab_8663      | 6665-16-3             | 217.12 | 2.50 | M-H          | C9H18N2O4   | 1.35 | 1.22 | 0.03 |
| 388 | neg_5968 | Dual-release hydrocortisone                                  | metab_1292<br>3 | -                     | 471.26 | 3.50 | M+FA-H       | C22H38N2O4S | 1.32 | 1.22 | 0.01 |
| 389 | neg_2592 | P-Octopamine                                                 | metab_9287      | 104-14-3              | 458.23 | 3.48 | 3M-H         | C8H11NO2    | 1.32 | 1.22 | 0.01 |
| 390 | neg_6260 | Metoprolol                                                   | metab_1322<br>0 | 37350-58-6;51384-51-1 | 288.16 | 3.11 | M+Na-2H      | C15H25NO3   | 1.42 | 1.22 | 0.01 |
| 391 | pos_1665 | Ser Arg                                                      | metab_724       | -                     | 262.15 | 0.81 | M+H          | C9H19N5O4   | 1.16 | 1.22 | 0.02 |
| 392 | neg_5244 | Corticosterone                                               | metab_1213<br>7 | 50-22-6               | 391.21 | 4.77 | M+FA-H       | C21H30O4    | 1.25 | 1.22 | 0.03 |
| 393 | neg_5037 | PC(18:1(12Z)-O(9S,10R)/2:0)                                  | metab_1190<br>9 | -                     | 558.31 | 5.34 | M-H2O-H      | C28H52NO9P  | 1.42 | 1.22 | 0.00 |
| 394 | pos_5369 | NH-DVal(NMe)-Val-OMe                                         | metab_4743      | -                     | 245.19 | 3.75 | M+H          | C12H24N2O3  | 1.27 | 1.22 | 0.01 |

|     |          |                                                          |             |             |        |      |           |             |      |      |      |
|-----|----------|----------------------------------------------------------|-------------|-------------|--------|------|-----------|-------------|------|------|------|
| 395 | pos_2270 | Leu Val Thr                                              | metab_1372  | -           | 332.22 | 2.21 | M+H       | C15H29N3O5  | 1.25 | 1.22 | 0.00 |
| 396 | neg_5902 | Voacamine                                                | metab_12852 | 3371-85-5   | 739.36 | 3.59 | M+Cl      | C43H52N4O5  | 1.34 | 1.22 | 0.00 |
| 397 | neg_6572 | Ser Thr Thr Ala Val                                      | metab_13551 | -           | 476.24 | 2.69 | M-H       | C19H35N5O9  | 1.42 | 1.22 | 0.00 |
| 398 | pos_2594 | Thyrotropin-releasing factor                             | metab_1721  | -           | 395.20 | 2.83 | M+CH3OH+H | C16H22N6O4  | 1.17 | 1.22 | 0.01 |
| 399 | neg_2273 | 2',3'-Dideoxyuridine                                     | metab_8955  | -           | 423.15 | 2.95 | 2M-H      | C9H12N2O4   | 1.35 | 1.22 | 0.00 |
| 400 | neg_3534 | LysoPG(16:0/0:0)                                         | metab_10310 | 116870-26-9 | 519.25 | 5.63 | M+Cl      | C22H45O9P   | 1.25 | 1.23 | 0.01 |
| 401 | pos_1610 | Leu Arg                                                  | metab_668   | -           | 288.20 | 0.69 | M+H       | C12H25N5O3  | 1.28 | 1.23 | 0.00 |
| 402 | neg_433  | N-[(2Z)-2-Methoxyiminopropyl]-7H-purin-6-amine           | metab_11155 | -           | 439.21 | 5.63 | M-H, 2M-H | C9H12N6O    | 1.30 | 1.23 | 0.03 |
| 403 | pos_6403 | Leucyl-Glutamine                                         | metab_5878  | -           | 242.15 | 2.11 | M+H-H2O   | C11H21N3O4  | 1.16 | 1.23 | 0.01 |
| 404 | pos_6668 | Val Glu Glu                                              | metab_6159  | -           | 376.17 | 1.87 | M+H       | C15H25N3O8  | 1.25 | 1.23 | 0.00 |
| 405 | pos_5745 | PS(18:1(11Z)/18:2(9Z,12Z))                               | metab_5158  | -           | 415.75 | 3.08 | M+2Na     | C42H76NO10P | 1.21 | 1.23 | 0.02 |
| 406 | pos_5083 | Leu Pro Phe                                              | metab_4428  | -           | 376.22 | 4.39 | M+H       | C20H29N3O4  | 1.25 | 1.23 | 0.00 |
| 407 | pos_7079 | Val Gln                                                  | metab_6587  | -           | 246.14 | 1.02 | M+H       | C10H19N3O4  | 1.26 | 1.23 | 0.01 |
| 408 | neg_6437 | Gln Asp Leu Glu                                          | metab_13411 | -           | 502.22 | 2.87 | M-H       | C20H33N5O10 | 1.34 | 1.23 | 0.00 |
| 409 | pos_6182 | Val Gly Val                                              | metab_5641  | -           | 274.18 | 2.42 | M+H       | C12H23N3O4  | 1.28 | 1.23 | 0.01 |
| 410 | pos_6370 | Thr Leu                                                  | metab_5843  | -           | 233.15 | 2.16 | M+H       | C10H20N2O4  | 1.21 | 1.23 | 0.03 |
| 411 | neg_5831 | Cis-and trans-Ethyl 2,4-dimethyl-1,3-dioxolane-2-acetate | metab_12774 | -           | 421.21 | 3.72 | 2M+FA-H   | C9H16O4     | 1.24 | 1.23 | 0.02 |

|     |          |                                 |             |                         |        |      |          |             |      |      |      |
|-----|----------|---------------------------------|-------------|-------------------------|--------|------|----------|-------------|------|------|------|
| 412 | neg_6146 | Etodolac                        | metab_13117 | 41340-25-4              | 308.13 | 3.22 | M+Na-2H  | C17H21NO3   | 1.27 | 1.23 | 0.03 |
| 413 | neg_2832 | Moxifloxacin                    | metab_9547  | 151096-09-2;354812-41-2 | 847.35 | 3.93 | 2M+FA-H  | C21H24FN3O4 | 1.25 | 1.23 | 0.03 |
| 414 | pos_5961 | Dihydrodigoxin                  | metab_5398  | 1241013.00              | 403.22 | 2.72 | M+H+Na   | C41H66O14   | 1.25 | 1.23 | 0.01 |
| 415 | pos_2835 | Herbimycin a                    | metab_1988  | 70563-58-5              | 638.30 | 3.36 | M+ACN+Na | C30H42N2O9  | 1.31 | 1.23 | 0.00 |
| 416 | neg_2663 | Levetiracetam                   | metab_9363  | 102767-28-2             | 399.23 | 3.60 | 2M+Hac-H | C8H14N2O2   | 1.25 | 1.23 | 0.05 |
| 417 | neg_7270 | D[-Arg-2]KYOTORPHAN             | metab_14254 | -                       | 336.17 | 1.63 | M-H      | C15H23N5O4  | 1.28 | 1.23 | 0.01 |
| 418 | neg_5574 | Carbuterol                      | metab_12496 | -                       | 312.16 | 4.14 | M+FA-H   | C13H21N3O3  | 1.15 | 1.23 | 0.04 |
| 419 | pos_5144 | Verdamicin                      | metab_4496  | -                       | 444.28 | 4.26 | M+H-H2O  | C20H39N5O7  | 1.24 | 1.23 | 0.00 |
| 420 | pos_2448 | Flibanserin                     | metab_1563  | -                       | 408.20 | 2.53 | M+NH4    | C20H21F3N4O | 1.22 | 1.23 | 0.01 |
| 421 | neg_7343 | Lysyltyrosine                   | metab_14324 | 35978-98-4              | 308.16 | 1.42 | M-H      | C15H23N3O4  | 1.28 | 1.23 | 0.03 |
| 422 | neg_3170 | 21-Deoxycortisol                | metab_9912  | 641-77-0                | 391.21 | 4.63 | M+FA-H   | C21H30O4    | 1.21 | 1.23 | 0.02 |
| 423 | neg_6036 | Dihydroneopine                  | metab_12999 | -                       | 322.14 | 3.39 | M+Na-2H  | C18H23NO3   | 1.26 | 1.23 | 0.04 |
| 424 | neg_1443 | Leucyl-Arginine                 | metab_8117  | -                       | 286.19 | 1.17 | M-H      | C12H25N5O3  | 1.37 | 1.23 | 0.00 |
| 425 | pos_6332 | Pro Gln Val                     | metab_5803  | -                       | 343.20 | 2.21 | M+H      | C15H26N4O5  | 1.24 | 1.23 | 0.01 |
| 426 | pos_4849 | Ile Ile Ile                     | metab_4169  | -                       | 358.27 | 5.11 | M+H      | C18H35N3O4  | 1.25 | 1.23 | 0.00 |
| 427 | pos_6787 | Asp Ile Lys                     | metab_6277  | -                       | 375.22 | 1.64 | M+H      | C16H30N4O6  | 1.30 | 1.23 | 0.01 |
| 428 | neg_2685 | Phenylalanylmethionine          | metab_9386  | 15080-84-9              | 295.11 | 3.66 | M-H      | C14H20N2O3S | 1.25 | 1.23 | 0.02 |
| 429 | pos_6483 | 2-Deoxystreptamine              | metab_5957  | 2037-48-1               | 347.19 | 2.03 | 2M+Na    | C6H14N2O3   | 1.28 | 1.23 | 0.00 |
| 430 | neg_3121 | Glycylphenylalanylleucylglycine | metab_9859  | -                       | 391.20 | 4.50 | M-H      | C19H28N4O5  | 1.24 | 1.23 | 0.01 |

|     |          |                                              |                 |             |        |      |                               |                                                                 |      |      |      |
|-----|----------|----------------------------------------------|-----------------|-------------|--------|------|-------------------------------|-----------------------------------------------------------------|------|------|------|
| 431 | pos_1140 | Ala Asp Leu                                  | metab_157       | -           | 318.17 | 2.49 | M+H-H <sub>2</sub> O,<br>M+H  | C <sub>13</sub> H <sub>23</sub> N <sub>3</sub> O <sub>6</sub>   | 1.32 | 1.24 | 0.01 |
| 432 | neg_1892 | Beta-Funaltrexamine                          | metab_8556      | 72782-05-9  | 489.18 | 2.24 | M+Cl                          | C <sub>25</sub> H <sub>30</sub> N <sub>2</sub> O <sub>6</sub>   | 1.45 | 1.24 | 0.00 |
| 433 | neg_720  | Gly-pro-arg-pro                              | metab_1419<br>4 | -           | 460.20 | 2.83 | M-H <sub>2</sub> O-H,<br>M+Cl | C <sub>18</sub> H <sub>31</sub> N <sub>7</sub> O <sub>5</sub>   | 1.33 | 1.24 | 0.03 |
| 434 | neg_1560 | Asparaginyln-Valine                          | metab_8233      | -           | 230.11 | 1.60 | M-H                           | C <sub>9</sub> H <sub>17</sub> N <sub>3</sub> O <sub>4</sub>    | 1.43 | 1.24 | 0.01 |
| 435 | neg_5301 | Subaphylline                                 | metab_1219<br>9 | 501-13-3    | 573.29 | 4.63 | 2M+FA-H                       | C <sub>14</sub> H <sub>20</sub> N <sub>2</sub> O <sub>3</sub>   | 1.38 | 1.24 | 0.02 |
| 436 | pos_2660 | Dehydroepiandrosterone<br>sulfate            | metab_1795      | 651-48-9    | 401.20 | 2.99 | M+CH <sub>3</sub> OH+<br>H    | C <sub>19</sub> H <sub>28</sub> O <sub>5</sub> S                | 1.27 | 1.24 | 0.01 |
| 437 | neg_7322 | Serylvaline                                  | metab_1430<br>2 | 51782-06-0  | 203.10 | 1.49 | M-H                           | C <sub>8</sub> H <sub>16</sub> N <sub>2</sub> O <sub>4</sub>    | 1.40 | 1.24 | 0.03 |
| 438 | neg_3221 | Tryptophyl-Isoleucine                        | metab_9968      | -           | 316.17 | 4.78 | M-H                           | C <sub>17</sub> H <sub>23</sub> N <sub>3</sub> O <sub>3</sub>   | 1.33 | 1.24 | 0.02 |
| 439 | neg_3009 | Triterpenoid                                 | metab_9738      | -           | 573.29 | 4.28 | M+Na-2H                       | C <sub>30</sub> H <sub>48</sub> O <sub>7</sub> S                | 1.35 | 1.24 | 0.02 |
| 440 | neg_5581 | Cabastine                                    | metab_1250<br>4 | -           | 885.43 | 4.12 | 2M+FA-H                       | C <sub>26</sub> H <sub>29</sub> FN <sub>2</sub> O <sub>2</sub>  | 1.31 | 1.24 | 0.03 |
| 441 | pos_5501 | Vigabatrin                                   | metab_4888      | 60643-86-9  | 300.19 | 3.49 | 2M+ACN+H                      | C <sub>6</sub> H <sub>11</sub> NO <sub>2</sub>                  | 1.25 | 1.24 | 0.00 |
| 442 | pos_6648 | Asp Lys Leu                                  | metab_6137      | -           | 375.22 | 1.90 | M+H                           | C <sub>16</sub> H <sub>30</sub> N <sub>4</sub> O <sub>6</sub>   | 1.32 | 1.24 | 0.01 |
| 443 | pos_6215 | L-Norleucine                                 | metab_5678      | 327-57-1    | 173.13 | 2.37 | M+ACN+H                       | C <sub>6</sub> H <sub>13</sub> NO <sub>2</sub>                  | 1.24 | 1.24 | 0.00 |
| 444 | neg_5229 | (p-SCN-Bn)-dota                              | metab_1212<br>1 | -           | 596.20 | 4.81 | M+FA-H                        | C <sub>24</sub> H <sub>33</sub> N <sub>5</sub> O <sub>8</sub> S | 1.35 | 1.24 | 0.00 |
| 445 | pos_3174 | Crotetamide                                  | metab_2362      | -           | 259.20 | 4.34 | M+CH <sub>3</sub> OH+<br>H    | C <sub>12</sub> H <sub>22</sub> N <sub>2</sub> O <sub>2</sub>   | 1.26 | 1.24 | 0.00 |
| 446 | neg_2504 | S-Farnesyl cysteine                          | metab_9192      | 68000-92-0  | 360.18 | 3.29 | M+Cl                          | C <sub>18</sub> H <sub>31</sub> NO <sub>2</sub> S               | 1.44 | 1.24 | 0.01 |
| 447 | neg_787  | 1-(3-Methyl-2-butenoyl)-6-<br>apiosylglucose | metab_1483<br>5 | 467242-32-6 | 393.14 | 3.16 | M-H <sub>2</sub> O-H, M-<br>H | C <sub>16</sub> H <sub>26</sub> O <sub>11</sub>                 | 1.34 | 1.24 | 0.01 |

|     |          |                                             |                 |             |        |      |                      |                                                                  |      |      |      |
|-----|----------|---------------------------------------------|-----------------|-------------|--------|------|----------------------|------------------------------------------------------------------|------|------|------|
| 448 | neg_5331 | Rivenprost                                  | metab_1223<br>2 | -           | 431.19 | 4.57 | M-H <sub>2</sub> O-H | C <sub>24</sub> H <sub>34</sub> O <sub>6</sub> S                 | 1.21 | 1.24 | 0.04 |
| 449 | pos_5973 | Epothilone A                                | metab_5411      | 152044-53-6 | 511.29 | 2.69 | M+NH <sub>4</sub>    | C <sub>26</sub> H <sub>39</sub> NO <sub>6</sub> S                | 1.27 | 1.25 | 0.01 |
| 450 | neg_5721 | Neopine                                     | metab_1265<br>6 | 467-14-1    | 657.32 | 3.88 | 2M+Hac-H             | C <sub>18</sub> H <sub>21</sub> NO <sub>3</sub>                  | 1.35 | 1.25 | 0.03 |
| 451 | pos_2502 | Ser Gly Phe                                 | metab_1622      | -           | 310.14 | 2.63 | M+H                  | C <sub>14</sub> H <sub>19</sub> N <sub>3</sub> O <sub>5</sub>    | 1.27 | 1.25 | 0.00 |
| 452 | neg_5936 | Ketotrilostane                              | metab_1288<br>9 | -           | 348.16 | 3.55 | M+Na-2H              | C <sub>20</sub> H <sub>25</sub> NO <sub>3</sub>                  | 1.37 | 1.25 | 0.00 |
| 453 | pos_2551 | Ultram                                      | metab_1675      | 27203-92-5  | 286.18 | 2.75 | M+Na                 | C <sub>16</sub> H <sub>25</sub> NO <sub>2</sub>                  | 1.34 | 1.25 | 0.01 |
| 454 | pos_5661 | 1-Octen-3-yl primeveroside                  | metab_5065      | 209863-01-4 | 423.22 | 3.21 | M+H                  | C <sub>19</sub> H <sub>34</sub> O <sub>10</sub>                  | 1.17 | 1.25 | 0.03 |
| 455 | neg_4888 | O-Desmethylverapamil (D-702)                | metab_1174<br>4 | -           | 485.26 | 5.63 | M+FA-H               | C <sub>26</sub> H <sub>36</sub> N <sub>2</sub> O <sub>4</sub>    | 1.32 | 1.25 | 0.02 |
| 456 | pos_3634 | GPEtn(16:1/22:5)                            | metab_2869      | -           | 764.52 | 6.62 | M+H                  | C <sub>43</sub> H <sub>74</sub> NO <sub>8</sub> P                | 1.75 | 1.25 | 0.01 |
| 457 | neg_2901 | Penitrem E                                  | metab_9622      | 78213-66-8  | 598.32 | 4.07 | M-H                  | C <sub>37</sub> H <sub>45</sub> NO <sub>6</sub>                  | 1.39 | 1.25 | 0.02 |
| 458 | neg_5698 | Moroxydine                                  | metab_1262<br>9 | -           | 387.23 | 3.93 | 2M+FA-H              | C <sub>6</sub> H <sub>13</sub> N <sub>5</sub> O                  | 1.41 | 1.25 | 0.01 |
| 459 | neg_5556 | 3-(Benzylamino)-3-methylbutanoic Acid       | metab_1247<br>6 | -           | 413.24 | 4.16 | 2M-H                 | C <sub>12</sub> H <sub>17</sub> NO <sub>2</sub>                  | 1.37 | 1.25 | 0.04 |
| 460 | neg_5682 | PC(20:5(7Z,9Z,11E,13E,17Z)-3OH(5,6,15)/2:0) | metab_1261<br>2 | -           | 630.31 | 3.95 | M-H                  | C <sub>30</sub> H <sub>50</sub> NO <sub>11</sub> P               | 1.33 | 1.25 | 0.02 |
| 461 | neg_5548 | CPA(18:0/0:0)                               | metab_1246<br>7 | -           | 441.24 | 4.18 | M+Na-2H              | C <sub>21</sub> H <sub>41</sub> O <sub>6</sub> P                 | 1.32 | 1.25 | 0.01 |
| 462 | pos_2075 | Alanylmethionine                            | metab_1162      | 14486-05-6  | 221.10 | 1.86 | M+H                  | C <sub>8</sub> H <sub>16</sub> N <sub>2</sub> O <sub>3</sub> S   | 1.25 | 1.25 | 0.02 |
| 463 | pos_6330 | MG(5-iso PGF <sub>2</sub> VI/0:0/0:0)       | metab_5801      | -           | 442.28 | 2.21 | M+ACN+H              | C <sub>21</sub> H <sub>36</sub> O <sub>7</sub>                   | 1.29 | 1.25 | 0.01 |
| 464 | neg_2456 | Leukotriene-D <sub>4</sub>                  | metab_9142      | -           | 516.23 | 3.21 | M+Na-2H              | C <sub>25</sub> H <sub>39</sub> N <sub>2</sub> O <sub>6</sub> S- | 1.39 | 1.25 | 0.02 |
| 465 | neg_7037 | Glutaminylmethionine                        | metab_1402<br>7 | 114659-59-5 | 276.10 | 2.06 | M-H                  | C <sub>10</sub> H <sub>19</sub> N <sub>3</sub> O <sub>4</sub> S  | 1.27 | 1.25 | 0.02 |

|     |          |                                                    |                 |             |        |      |                                  |            |      |      |      |
|-----|----------|----------------------------------------------------|-----------------|-------------|--------|------|----------------------------------|------------|------|------|------|
| 466 | neg_915  | N-alpha-Acetyl-L-citrulline                        | metab_1531<br>1 | 33965-42-3  | 433.21 | 3.96 | 2M-H,<br>2M+Hac-H                | C8H15N3O4  | 1.34 | 1.25 | 0.01 |
| 467 | pos_5426 | L-Hypoglycin A                                     | metab_4806      | 156-56-9    | 300.19 | 3.63 | 2M+NH4                           | C7H11NO2   | 1.25 | 1.25 | 0.00 |
| 468 | pos_1993 | 1-(3-Pyridinyl)-1,4-butanediol                     | metab_1078      | 76014-83-0  | 398.20 | 1.62 | 2M+ACN+Na                        | C9H13NO2   | 1.31 | 1.25 | 0.00 |
| 469 | neg_5820 | H-D-Tyr-val-gly-OH                                 | metab_1276<br>2 | -           | 318.15 | 3.74 | M-H2O-H                          | C16H23N3O5 | 1.32 | 1.25 | 0.02 |
| 470 | neg_5106 | Janthitrem E                                       | metab_1198<br>6 | 90986-50-8  | 584.34 | 5.12 | M-H2O-H                          | C37H49NO6  | 1.46 | 1.25 | 0.01 |
| 471 | pos_6352 | Aminocaproic acid                                  | metab_5825      | 60-32-2     | 173.13 | 2.18 | M+ACN+H                          | C6H13NO2   | 1.18 | 1.25 | 0.02 |
| 472 | pos_104  | Glutaminyserine                                    | metab_46        | 5875-40-1   | 275.13 | 0.62 | M+H-H2O,<br>M+ACN+H,<br>M+H-2H2O | C8H15N3O5  | 1.30 | 1.25 | 0.00 |
| 473 | neg_5976 | 3-Hydroxy-beta-ionol 3-[glucosyl-(1->6)-glucoside] | metab_1293<br>2 | 137606-56-5 | 555.24 | 3.48 | M+Na-2H                          | C25H42O12  | 1.44 | 1.25 | 0.00 |
| 474 | pos_6600 | Aspartyl-Lysine                                    | metab_6086      | 5891-51-0   | 303.17 | 1.94 | M+ACN+H                          | C10H19N3O5 | 1.25 | 1.25 | 0.01 |
| 475 | neg_5100 | Silux                                              | metab_1198<br>0 | -           | 547.21 | 5.14 | M+Cl                             | C29H36O8   | 1.35 | 1.25 | 0.02 |
| 476 | neg_2797 | Leukotriene E3                                     | metab_9507      | 79494-05-6  | 486.26 | 3.87 | M+FA-H                           | C23H39NO5S | 1.41 | 1.25 | 0.01 |
| 477 | pos_1145 | Ac-Pro-Gly-Pro-OH                                  | metab_162       | -           | 344.18 | 2.18 | M+CH3OH+<br>H, 2M+H              | C14H21N3O5 | 1.26 | 1.25 | 0.02 |
| 478 | neg_2779 | Perindoprilat                                      | metab_9487      | -           | 375.17 | 3.84 | M+Cl                             | C17H28N2O5 | 1.38 | 1.25 | 0.01 |
| 479 | pos_5944 | Asp Ala Phe                                        | metab_5379      | -           | 352.15 | 2.75 | M+H                              | C16H21N3O6 | 1.23 | 1.25 | 0.01 |
| 480 | neg_5426 | Pangamic acid                                      | metab_1233<br>6 | 11006-56-7  | 473.23 | 4.38 | M+K-2H                           | C20H40N2O8 | 1.32 | 1.25 | 0.01 |
| 481 | pos_2895 | Cyclo(L-Phe-L-Pro)                                 | metab_2053      | 3705-26-8   | 277.15 | 3.51 | M+CH3OH+<br>H                    | C14H16N2O2 | 1.24 | 1.25 | 0.00 |



|     |          |                                                   |             |                       |        |      |           |             |      |      |      |
|-----|----------|---------------------------------------------------|-------------|-----------------------|--------|------|-----------|-------------|------|------|------|
| 482 | pos_5007 | Leucyl-Glutamate                                  | metab_4346  | -                     | 243.13 | 4.59 | M+H-H2O   | C11H20N2O5  | 1.17 | 1.25 | 0.01 |
| 483 | neg_6590 | Threonylisoleucine                                | metab_13569 | 129050-49-3           | 231.13 | 2.68 | M-H       | C10H20N2O4  | 1.39 | 1.25 | 0.03 |
| 484 | neg_2831 | PC(2:0/PGJ2)                                      | metab_9546  | -                     | 636.29 | 3.93 | M+Na-2H   | C30H50NO10P | 1.42 | 1.26 | 0.02 |
| 485 | neg_5761 | Beta-Zearalenol                                   | metab_15409 | 71030-11-0;36455-72-8 | 699.33 | 3.82 | 2M+Hac-H  | C18H24O5    | 1.39 | 1.26 | 0.01 |
| 486 | pos_2947 | Mesobilirubinogen                                 | metab_2111  | 14684-37-8            | 593.33 | 3.65 | M+H       | C33H44N4O6  | 1.31 | 1.26 | 0.00 |
| 487 | neg_6688 | Bursin                                            | metab_13668 | -                     | 360.18 | 2.52 | M+Na-2H   | C14H25N7O3  | 1.37 | 1.26 | 0.02 |
| 488 | pos_5242 | (1S,2S,4R)-p-Menth-8-ene-1,2,10-triol 2-glucoside | metab_4603  | 378254-11-6           | 381.21 | 4.03 | M+CH3OH+H | C16H28O8    | 1.24 | 1.26 | 0.00 |
| 489 | pos_3167 | Forskolin                                         | metab_7659  | 66575-29-9;3413-15-8  | 393.22 | 4.32 | M+H-H2O   | C22H34O7    | 1.26 | 1.26 | 0.01 |
| 490 | neg_6203 | Imidaprilat                                       | metab_13168 | 89371-44-8            | 376.15 | 3.16 | M-H       | C18H23N3O6  | 1.39 | 1.26 | 0.00 |
| 491 | pos_2879 | Phe Ile                                           | metab_2035  | -                     | 279.17 | 3.48 | M+H       | C15H22N2O3  | 1.21 | 1.26 | 0.04 |
| 492 | pos_6384 | Cortolone-3-glucuronide                           | metab_5856  | 56162-46-0            | 584.30 | 2.13 | M+ACN+H   | C27H42O11   | 1.36 | 1.26 | 0.00 |
| 493 | pos_6016 | Asp Glu Leu                                       | metab_5459  | -                     | 376.17 | 2.63 | M+H       | C15H25N3O8  | 1.22 | 1.26 | 0.01 |
| 494 | neg_7856 | Threonylglutamine                                 | metab_14823 | 96337-79-0            | 246.11 | 0.64 | M-H       | C9H17N3O5   | 1.35 | 1.26 | 0.02 |
| 495 | neg_2757 | Fumonisin B2                                      | metab_9464  | 116355-84-1           | 686.37 | 3.79 | M-H2O-H   | C34H59NO14  | 1.43 | 1.26 | 0.02 |
| 496 | pos_3127 | Leu Asp Ile                                       | metab_2311  | -                     | 360.21 | 4.20 | M+H       | C16H29N3O6  | 1.31 | 1.26 | 0.01 |
| 497 | neg_2796 | Velagliflozin                                     | metab_9506  | -                     | 376.15 | 3.87 | M-H2O-H   | C23H25NO5   | 1.29 | 1.26 | 0.02 |
| 498 | neg_2362 | Toosendanin                                       | metab_9047  | -                     | 619.24 | 3.10 | M+FA-H    | C30H38O11   | 1.45 | 1.26 | 0.01 |
| 499 | pos_5590 | N-Methoxysuccinyl-Ala-Ala-Pro-Val                 | metab_4986  | -                     | 534.26 | 3.32 | M+ACN+Na  | C21H34N4O8  | 1.35 | 1.26 | 0.00 |
| 500 | pos_3155 | Pimaricin                                         | metab_2342  | 7681-93-8             | 666.31 | 4.28 | M+H       | C33H47NO13  | 1.25 | 1.26 | 0.01 |

|     |          |                                                                         |             |             |        |      |                       |               |      |      |      |
|-----|----------|-------------------------------------------------------------------------|-------------|-------------|--------|------|-----------------------|---------------|------|------|------|
| 501 | neg_5130 | N-Myristoyl Tryptophan                                                  | metab_12013 | -           | 413.28 | 5.04 | M-H                   | C25H38N2O3    | 1.46 | 1.26 | 0.01 |
| 502 | pos_3047 | Leu Pro Ile                                                             | metab_2222  | -           | 342.24 | 3.93 | M+H                   | C17H31N3O4    | 1.26 | 1.26 | 0.01 |
| 503 | neg_5448 | O-Phenolsulfonic acid                                                   | metab_12357 | -           | 172.99 | 4.34 | M-H                   | C6H6O4S       | 1.44 | 1.26 | 0.00 |
| 504 | pos_2987 | Ile Trp                                                                 | metab_2154  | -           | 318.18 | 3.77 | M+H                   | C17H23N3O3    | 1.22 | 1.26 | 0.03 |
| 505 | neg_3033 | Cyclofoxy                                                               | metab_9761  | -           | 390.17 | 4.32 | M+FA-H                | C20H24FNO3    | 1.32 | 1.26 | 0.01 |
| 506 | neg_7252 | Valylglutamine                                                          | metab_14234 | 42854-54-6  | 244.13 | 1.68 | M-H                   | C10H19N3O4    | 1.45 | 1.26 | 0.02 |
| 507 | pos_556  | 1,2,10-Trihydroxydihydro-trans-linalyl oxide 7-O-beta-D-glucopyranoside | metab_4952  | 219814-37-6 | 415.22 | 2.72 | M+H-H2O,<br>M+CH3OH+H | C16H30O10     | 1.28 | 1.27 | 0.03 |
| 508 | pos_3088 | CDP-DG(i-12:0/i-24:0)                                                   | metab_2267  | -           | 516.78 | 4.07 | M+H+Na                | C48H89N3O15P2 | 1.32 | 1.27 | 0.01 |
| 509 | pos_2360 | Ser Ile Met                                                             | metab_1467  | -           | 350.17 | 2.38 | M+H                   | C14H27N3O5S   | 1.34 | 1.27 | 0.00 |
| 510 | neg_5503 | LysoPE(16:1(9Z)/0:0)                                                    | metab_12418 | -           | 472.24 | 4.25 | M+Na-2H               | C21H42NO7P    | 1.35 | 1.27 | 0.03 |
| 511 | neg_5596 | PA(PGF2alpha/10:0)                                                      | metab_12519 | -           | 699.32 | 4.10 | M+K-2H                | C33H59O11P    | 1.47 | 1.27 | 0.00 |
| 512 | neg_1651 | Ritodrine                                                               | metab_8314  | 26652-09-5  | 308.13 | 1.84 | M+Na-2H               | C17H21NO3     | 1.40 | 1.27 | 0.02 |
| 513 | pos_6712 | Histidinal                                                              | metab_6203  | 23784-15-8  | 342.17 | 1.83 | 2M+ACN+Na             | C6H9N3O       | 1.25 | 1.27 | 0.01 |
| 514 | neg_5246 | Acetophenazine                                                          | metab_12139 | 2751-68-0   | 392.18 | 4.77 | M-H2O-H               | C23H29N3O2S   | 1.23 | 1.27 | 0.04 |
| 515 | neg_7387 | Terazosin                                                               | metab_14366 | 63590-64-7  | 408.16 | 1.28 | M+Na-2H               | C19H25N5O4    | 1.34 | 1.27 | 0.01 |
| 516 | neg_5619 | 3-Methoxytyramine                                                       | metab_12545 | 554-52-9    | 500.27 | 4.06 | 3M-H                  | C9H13NO2      | 1.43 | 1.27 | 0.01 |

|     |          |                                               |             |                  |        |      |              |            |      |      |      |
|-----|----------|-----------------------------------------------|-------------|------------------|--------|------|--------------|------------|------|------|------|
| 517 | pos_6843 | Asn Leu Lys                                   | metab_6336  | -                | 374.24 | 1.60 | M+H          | C16H31N5O5 | 1.33 | 1.27 | 0.00 |
| 518 | neg_5853 | LysoPE(18:2(9Z,12Z)/0:0)                      | metab_12798 | 85046-18-0       | 498.26 | 3.68 | M+Na-2H      | C23H44NO7P | 1.40 | 1.27 | 0.01 |
| 519 | neg_5290 | Methylprednisolone hemisuccinate              | metab_12186 | -                | 455.20 | 4.66 | M-H2O-H      | C26H34O8   | 1.35 | 1.27 | 0.03 |
| 520 | pos_4924 | Pumiliotoxin A                                | metab_4253  | 67054-00-6       | 330.24 | 4.85 | M+Na         | C19H33NO2  | 1.28 | 1.27 | 0.00 |
| 521 | pos_3129 | Asebotoxin                                    | metab_2313  | -                | 457.22 | 4.20 | M+2Na-H      | C22H36O7   | 1.32 | 1.27 | 0.00 |
| 522 | pos_2369 | Phe Leu Arg                                   | metab_1476  | -                | 435.27 | 2.40 | M+H          | C21H34N6O4 | 1.36 | 1.27 | 0.00 |
| 523 | neg_1637 | Arginylisoleucine                             | metab_8300  | 62632-70-6       | 286.19 | 1.81 | M-H          | C12H25N5O3 | 1.52 | 1.27 | 0.01 |
| 524 | neg_3546 | Chenodeoxycholylmethionine                    | metab_10323 | -                | 568.34 | 5.64 | M+FA-H       | C29H49NO5S | 1.44 | 1.27 | 0.00 |
| 525 | neg_906  | Kukoamine C                                   | metab_15301 | -                | 529.30 | 3.88 | M-H2O-H, M-H | C28H42N4O6 | 1.39 | 1.27 | 0.01 |
| 526 | neg_1620 | Xenognosin A                                  | metab_8286  | 76907-79-4       | 277.09 | 1.74 | M+Na-2H      | C16H16O3   | 1.40 | 1.27 | 0.04 |
| 527 | neg_6110 | Vanillylamine                                 | metab_13080 | 1196-92-5        | 458.23 | 3.25 | 3M-H         | C8H11NO2   | 1.50 | 1.27 | 0.00 |
| 528 | neg_3319 | 1-Nonadecanoyl-glycero-3-phosphoserine        | metab_10076 | -                | 576.27 | 5.04 | M+K-2H       | C25H50NO9P | 1.45 | 1.27 | 0.00 |
| 529 | neg_3873 | PE(22:6(4Z,7Z,10Z,13Z,16Z,19Z)/16:0)          | metab_10660 | -                | 762.51 | 6.35 | M-H          | C43H74NO8P | 1.05 | 1.27 | 0.01 |
| 530 | pos_5507 | Linalool oxide D 3-[apiosyl-(1->6)-glucoside] | metab_4894  | -                | 506.26 | 3.47 | M+ACN+H      | C21H36O11  | 1.40 | 1.27 | 0.00 |
| 531 | neg_4979 | Estrone                                       | metab_15418 | 481-97-0;53-16-7 | 585.33 | 5.52 | 2M+FA-H      | C18H22O2   | 1.46 | 1.27 | 0.01 |
| 532 | pos_3453 | Physagulin F                                  | metab_2672  | -                | 509.26 | 5.53 | M+H-2H2O     | C30H40O9   | 1.23 | 1.27 | 0.01 |
| 533 | neg_4994 | Physangulide                                  | metab_11861 | 131749-58-1      | 567.28 | 5.49 | M+FA-H       | C28H42O9   | 1.52 | 1.27 | 0.00 |

|     |          |                                                  |             |             |        |      |              |             |      |      |      |
|-----|----------|--------------------------------------------------|-------------|-------------|--------|------|--------------|-------------|------|------|------|
| 534 | pos_5989 | 3-Amino-4-methylpentanoic acid                   | metab_5428  | 5699-54-7   | 326.21 | 2.67 | 2M+ACN+Na    | C6H13NO2    | 1.29 | 1.28 | 0.01 |
| 535 | neg_5433 | Ibritumomab tiuxetan                             | metab_12343 | -           | 590.21 | 4.37 | M+Na-2H      | C24H35N5O11 | 1.37 | 1.28 | 0.01 |
| 536 | pos_2616 | Endomorphin-1                                    | metab_1746  | 189388-22-5 | 628.33 | 2.88 | M+NH4        | C34H38N6O5  | 1.38 | 1.28 | 0.00 |
| 537 | pos_815  | Adenosine, 8-(butylamino)-N-cyclopentyl-         | metab_7443  | -           | 407.24 | 5.06 | M+H, M+Na    | C19H30N6O4  | 1.30 | 1.28 | 0.01 |
| 538 | neg_636  | Asp Leu Ala Glu                                  | metab_13327 | -           | 445.19 | 2.38 | M-H, M+Na-2H | C18H30N4O9  | 1.46 | 1.28 | 0.03 |
| 539 | pos_2850 | Penitrem A                                       | metab_2004  | 12627-35-9  | 651.32 | 3.39 | M+NH4        | C37H44ClNO6 | 1.43 | 1.28 | 0.00 |
| 540 | pos_5202 | Trp Glu Val                                      | metab_4560  | -           | 433.21 | 4.12 | M+H          | C21H28N4O6  | 1.27 | 1.28 | 0.00 |
| 541 | neg_5458 | DIPROTIN A                                       | metab_12368 | -           | 340.22 | 4.33 | M-H          | C17H31N3O4  | 1.32 | 1.28 | 0.01 |
| 542 | neg_5719 | Mibefradil                                       | metab_12653 | 116644-53-2 | 532.24 | 3.89 | M+K-2H       | C29H38FN3O3 | 1.44 | 1.28 | 0.01 |
| 543 | pos_7434 | 5-Oxohexanoylcarnitine                           | metab_6965  | -           | 337.17 | 0.62 | M+ACN+Na     | C13H23NO5   | 1.23 | 1.28 | 0.03 |
| 544 | neg_2662 | DIPROTIN B                                       | metab_9362  | -           | 326.21 | 3.60 | M-H          | C16H29N3O4  | 1.36 | 1.28 | 0.02 |
| 545 | pos_3264 | Lidamidine                                       | metab_2462  | -           | 463.25 | 4.72 | 2M+Na        | C11H16N4O   | 1.35 | 1.28 | 0.00 |
| 546 | pos_2855 | 2-(2-Aminopropanylamino)-4-carbamoylbutyric acid | metab_2009  | -           | 435.22 | 3.40 | 2M+H         | C8H15N3O4   | 1.33 | 1.28 | 0.00 |
| 547 | pos_6583 | Val Glu Ser                                      | metab_6067  | -           | 334.16 | 1.94 | M+H          | C13H23N3O7  | 1.34 | 1.28 | 0.01 |
| 548 | pos_6190 | Pectenotoxin 1                                   | metab_5650  | 97564-90-4  | 438.24 | 2.40 | M+2H         | C47H70O15   | 1.45 | 1.28 | 0.00 |
| 549 | pos_3132 | Pyrimethanil                                     | metab_2317  | 53112-28-0  | 462.23 | 4.21 | 2M+ACN+Na    | C12H13N3    | 1.24 | 1.28 | 0.01 |
| 550 | neg_5407 | (E)-indol-3-ylacetaldoxime                       | metab_12315 | -           | 521.23 | 4.41 | 3M-H         | C10H10N2O   | 1.40 | 1.28 | 0.02 |

|     |          |                                                                                            |                 |            |        |      |                     |            |      |      |      |
|-----|----------|--------------------------------------------------------------------------------------------|-----------------|------------|--------|------|---------------------|------------|------|------|------|
| 551 | neg_6517 | Ile Ser Thr Glu                                                                            | metab_1349<br>2 | -          | 447.21 | 2.77 | M-H                 | C18H32N4O9 | 1.52 | 1.28 | 0.01 |
| 552 | neg_6567 | 3-Fluorophenmetrazine                                                                      | metab_1354<br>5 | -          | 389.20 | 2.70 | 2M-H                | C11H14FNO  | 1.42 | 1.28 | 0.04 |
| 553 | pos_2067 | Ser Leu Ser Gly Leu                                                                        | metab_1153      | -          | 476.27 | 1.84 | M+H                 | C20H37N5O8 | 1.38 | 1.28 | 0.00 |
| 554 | pos_1223 | Val Gly Thr                                                                                | metab_249       | -          | 276.15 | 1.83 | M+H-H2O,<br>M+H     | C11H21N3O5 | 1.38 | 1.28 | 0.01 |
| 555 | neg_5927 | Pentanoic acid, 5-<br>(dipentylamino)-5-oxo-4-<br>((3-quinolinylcarbonyl)amino)<br>-, (R)- | metab_1287<br>9 | -          | 486.26 | 3.55 | M+FA-H              | C25H35N3O4 | 1.45 | 1.28 | 0.01 |
| 556 | pos_573  | N-Acetylproline                                                                            | metab_5141      | 68-95-1    | 332.18 | 2.56 | M+ACN+Na,<br>2M+NH4 | C7H11NO3   | 1.33 | 1.28 | 0.02 |
| 557 | neg_5507 | Janthitrem F                                                                               | metab_1242<br>2 | 90986-52-0 | 690.37 | 4.25 | M+FA-H              | C39H51NO7  | 1.68 | 1.28 | 0.00 |
| 558 | pos_2849 | Adouetine Y                                                                                | metab_2002      | 19542-38-2 | 632.32 | 3.39 | M+ACN+Na            | C34H40N4O4 | 1.40 | 1.29 | 0.00 |
| 559 | pos_3005 | Ile Pro Ile                                                                                | metab_2176      | -          | 342.24 | 3.82 | M+H                 | C17H31N3O4 | 1.33 | 1.29 | 0.00 |
| 560 | pos_5917 | Persicaxanthin                                                                             | metab_5349      | 80952-82-5 | 429.23 | 2.79 | M+2Na-H             | C25H36O3   | 1.39 | 1.29 | 0.01 |
| 561 | pos_5523 | Protocrocin                                                                                | metab_4912      | -          | 809.36 | 3.43 | M+2Na               | C76H116O34 | 1.47 | 1.29 | 0.00 |
| 562 | pos_4228 | 2-Deoxycastasterone                                                                        | metab_3500      | 87734-68-7 | 431.35 | 6.49 | M+H-H2O             | C28H48O4   | 1.36 | 1.29 | 0.00 |
| 563 | neg_4881 | Cortisol 21-sulfate                                                                        | metab_1173<br>7 | 1253-43-6  | 883.33 | 5.63 | 2M-H                | C21H30O8S  | 1.59 | 1.29 | 0.00 |
| 564 | neg_5068 | 17-Dimethylaminogeldanamycin                                                               | metab_1194<br>3 | -          | 615.34 | 5.24 | M-H                 | C32H48N4O8 | 1.49 | 1.29 | 0.00 |

|     |          |                                        |                 |                     |        |      |                 |             |      |      |      |
|-----|----------|----------------------------------------|-----------------|---------------------|--------|------|-----------------|-------------|------|------|------|
| 565 | neg_6989 | Glycylhydroxyproline                   | metab_1397<br>4 | 24587-32-4          | 375.15 | 2.08 | 2M-H            | C7H12N2O4   | 1.43 | 1.29 | 0.00 |
| 566 | pos_4918 | Phe Met Leu                            | metab_4246      | -                   | 410.21 | 4.87 | M+H             | C20H31N3O4S | 1.27 | 1.29 | 0.00 |
| 567 | neg_380  | Leu Ile Ser Glu                        | metab_1058<br>4 | -                   | 459.25 | 4.56 | M-H, M+FA-<br>H | C20H36N4O8  | 1.41 | 1.29 | 0.02 |
| 568 | pos_2750 | 3-Amino-2,3-dihydrobenzoic acid        | metab_1894      | 87980-11-8          | 320.16 | 3.17 | 2M+ACN+H        | C7H9NO2     | 1.38 | 1.29 | 0.00 |
| 569 | neg_5439 | Sulfolithocholylglycine                | metab_1543<br>5 | 474-74-8;15324-64-8 | 512.27 | 4.35 | M-H             | C26H43NO7S  | 1.47 | 1.29 | 0.00 |
| 570 | neg_6231 | (2Z)-2-Morpholin-4-yliminoacetonitrile | metab_1319<br>1 | -                   | 416.21 | 3.14 | 3M-H            | C6H9N3O     | 1.44 | 1.29 | 0.01 |
| 571 | pos_6419 | Threonyllysine                         | metab_5892      | 23161-31-1          | 517.30 | 2.09 | 2M+Na           | C10H21N3O4  | 1.39 | 1.29 | 0.01 |
| 572 | neg_5803 | Pindolol                               | metab_1274<br>3 | 13523-86-9          | 541.30 | 3.77 | 2M+FA-H         | C14H20N2O2  | 1.46 | 1.29 | 0.00 |
| 573 | neg_2751 | Dihydroxylysinoonorleucine             | metab_9458      | -                   | 472.24 | 3.78 | M+Na-2H         | C18H37N5O8  | 1.43 | 1.29 | 0.04 |
| 574 | pos_2640 | Asp Gly Lys Ile Leu                    | metab_1773      | -                   | 545.33 | 2.94 | M+H             | C24H44N6O8  | 1.37 | 1.30 | 0.01 |
| 575 | pos_6422 | Leu Glu Thr                            | metab_5896      | -                   | 362.19 | 2.09 | M+H             | C15H27N3O7  | 1.37 | 1.30 | 0.00 |
| 576 | pos_2364 | Valyl-prolyl-glycyl-valyl-glycine      | metab_1471      | -                   | 428.25 | 2.39 | M+H             | C19H33N5O6  | 1.33 | 1.30 | 0.02 |
| 577 | pos_2382 | Pro Glu Ile                            | metab_1491      | -                   | 358.20 | 2.42 | M+H             | C16H27N3O6  | 1.32 | 1.30 | 0.01 |
| 578 | pos_6982 | Trospectomycin                         | metab_6488      | -                   | 419.18 | 1.17 | M+2Na-H         | C17H30N2O7  | 1.38 | 1.30 | 0.00 |
| 579 | neg_5740 | N-Jasmonoylisoleucine                  | metab_1267<br>7 | 120330-93-0         | 344.18 | 3.86 | M+Na-2H         | C18H29NO4   | 1.46 | 1.30 | 0.03 |
| 580 | pos_1885 | N1,N12-Diacetylspermine                | metab_959       | 61345-83-3          | 331.21 | 1.27 | M+2Na-H         | C14H30N4O2  | 1.37 | 1.30 | 0.01 |
| 581 | neg_3003 | LysoPE(0:0/20:5(5Z,8Z,11Z,14Z,17Z))    | metab_9732      | -                   | 498.26 | 4.27 | M-H             | C25H42NO7P  | 1.40 | 1.30 | 0.02 |

|     |          |                                                            |             |             |        |      |               |               |      |      |      |
|-----|----------|------------------------------------------------------------|-------------|-------------|--------|------|---------------|---------------|------|------|------|
| 582 | neg_3369 | N-Arachidonoyl Alanine                                     | metab_10130 | -           | 356.26 | 5.21 | M-H2O-H       | C23H37NO3     | 1.53 | 1.30 | 0.00 |
| 583 | pos_632  | Val Ala Val                                                | metab_5789  | -           | 288.19 | 3.24 | M+H, M+Na     | C13H25N3O4    | 1.44 | 1.30 | 0.00 |
| 584 | pos_2717 | Val Asn Ile                                                | metab_1857  | -           | 345.21 | 3.11 | M+H           | C15H28N4O5    | 1.43 | 1.30 | 0.00 |
| 585 | pos_2305 | Gly Phe Asn                                                | metab_1409  | -           | 337.15 | 2.27 | M+H           | C15H20N4O5    | 1.40 | 1.30 | 0.01 |
| 586 | pos_5718 | Ile Arg Leu                                                | metab_5128  | -           | 401.29 | 3.12 | M+H           | C18H36N6O4    | 1.35 | 1.30 | 0.00 |
| 587 | pos_5923 | Tert-Butyl (2-(2-hydroxyethoxy)ethyl)carbamate             | metab_5356  | -           | 449.22 | 2.77 | 2M+K          | C9H19NO4      | 1.47 | 1.30 | 0.00 |
| 588 | neg_5006 | Vertilmicin                                                | metab_11875 | -           | 470.30 | 5.46 | M-H2O-H       | C22H43N5O7    | 1.49 | 1.30 | 0.02 |
| 589 | neg_6434 | Lysylhydroxyproline                                        | metab_13408 | 870233-57-1 | 304.15 | 2.88 | M+FA-H        | C11H21N3O4    | 1.44 | 1.30 | 0.00 |
| 590 | neg_5838 | Fluphenazine enanthate                                     | metab_12781 | 2746-81-8   | 530.25 | 3.71 | M-H2O-H       | C29H38F3N3O2S | 1.44 | 1.30 | 0.01 |
| 591 | pos_3076 | 2-(p-Acetamidophenyl)-2-ethylglutarimide                   | metab_2254  | -           | 316.17 | 4.02 | M+ACN+H       | C15H18N2O3    | 1.36 | 1.30 | 0.00 |
| 592 | pos_2829 | Beta-Cortol                                                | metab_1981  | 667-65-2    | 401.29 | 3.35 | M+CH3OH+H     | C21H36O5      | 1.41 | 1.30 | 0.00 |
| 593 | pos_728  | Ile Glu Ile                                                | metab_6798  | -           | 374.23 | 4.04 | M+H-2H2O, M+H | C17H31N3O6    | 1.34 | 1.30 | 0.01 |
| 594 | pos_6218 | 3-O-Demethylfortimicin A                                   | metab_5681  | -           | 414.23 | 2.36 | M+Na          | C16H33N5O6    | 1.40 | 1.30 | 0.00 |
| 595 | neg_4991 | (9Z,11E,14Z)-(13S)-hydroperoxyoctadeca-(9,11,14)-trienoate | metab_11858 | -           | 354.20 | 5.50 | M+FA-H        | C18H29O4-     | 1.45 | 1.30 | 0.00 |
| 596 | pos_2684 | Asiaticoside                                               | metab_1820  | 16830-15-2  | 502.25 | 3.04 | M+2Na         | C48H78O19     | 1.36 | 1.30 | 0.01 |
| 597 | pos_5425 | Arginine, ethyl ester                                      | metab_4805  | -           | 443.25 | 3.63 | 2M+K          | C8H18N4O2     | 1.43 | 1.30 | 0.00 |

|     |          |                                                  |             |            |        |      |           |              |      |      |      |
|-----|----------|--------------------------------------------------|-------------|------------|--------|------|-----------|--------------|------|------|------|
| 598 | neg_5684 | Lysyl-aspartyl-glutamyl-leucine                  | metab_12614 | -          | 502.25 | 3.95 | M-H       | C21H37N5O9   | 1.46 | 1.30 | 0.05 |
| 599 | neg_2840 | Vorapaxar                                        | metab_9555  | -          | 473.23 | 3.95 | M-H2O-H   | C29H33FN2O4  | 1.41 | 1.30 | 0.04 |
| 600 | neg_5552 | Leustroducsin B                                  | metab_12472 | -          | 704.33 | 4.16 | M+Cl      | C34H56NO10P  | 1.54 | 1.30 | 0.00 |
| 601 | neg_2156 | D-Fucitol                                        | metab_8828  | -          | 331.16 | 2.77 | 2M-H      | C6H14O5      | 1.53 | 1.31 | 0.01 |
| 602 | pos_6174 | Ala Val Val                                      | metab_5632  | -          | 288.19 | 2.43 | M+H       | C13H25N3O4   | 1.39 | 1.31 | 0.00 |
| 603 | pos_6007 | Prostaglandin D1                                 | metab_5450  | 17968-82-0 | 387.27 | 2.64 | M+CH3OH+H | C20H34O5     | 1.38 | 1.31 | 0.00 |
| 604 | neg_3419 | Suloctidil                                       | metab_10185 | -          | 372.21 | 5.38 | M+Cl      | C20H35NOS    | 1.47 | 1.31 | 0.01 |
| 605 | pos_5821 | PE(14:1(9Z)/20:5(7Z,9Z,11E,13E,17Z)-3OH(5,6,15)) | metab_5243  | -          | 794.40 | 2.96 | M+K       | C39H66NO11P  | 1.47 | 1.31 | 0.00 |
| 606 | pos_2771 | Thr Pro Phe                                      | metab_1917  | -          | 364.19 | 3.23 | M+H       | C18H25N3O5   | 1.41 | 1.31 | 0.00 |
| 607 | neg_2900 | Allyl-isopropyl-acetylharnstoff                  | metab_9621  | -          | 427.26 | 4.07 | 2M+Hac-H  | C9H16N2O2    | 1.39 | 1.31 | 0.04 |
| 608 | neg_5537 | S-(11-hydroxy-9-deoxy-delta12-PGD2)-glutathione  | metab_12455 | -          | 644.33 | 4.20 | M-H       | C30H51N3O10S | 1.34 | 1.31 | 0.04 |
| 609 | pos_6229 | Ser Asp Ile                                      | metab_5693  | -          | 334.16 | 2.35 | M+H       | C13H23N3O7   | 1.42 | 1.31 | 0.01 |
| 610 | neg_3498 | Ancistrocladine                                  | metab_10269 | 32221-59-3 | 406.20 | 5.58 | M-H       | C25H29NO4    | 1.50 | 1.31 | 0.01 |
| 611 | pos_6084 | Thr Gln Leu                                      | metab_5533  | -          | 361.21 | 2.55 | M+H       | C15H28N4O6   | 1.39 | 1.31 | 0.01 |
| 612 | pos_6387 | Ribostamycin                                     | metab_5859  | 25546-65-0 | 419.21 | 2.13 | M+H-2H2O  | C17H34N4O10  | 1.52 | 1.31 | 0.00 |
| 613 | neg_5534 | Psychosine sulfate                               | metab_12452 | -          | 586.28 | 4.20 | M+FA-H    | C24H47NO10S  | 1.48 | 1.31 | 0.05 |
| 614 | pos_2354 | Val Ser Val                                      | metab_1460  | -          | 304.19 | 2.37 | M+H       | C13H25N3O5   | 1.38 | 1.31 | 0.00 |
| 615 | pos_6349 | Pro Leu Lys                                      | metab_5821  | -          | 357.25 | 2.18 | M+H       | C17H32N4O4   | 1.49 | 1.31 | 0.00 |



|     |          |                                                |                 |                       |  |        |      |                       |                   |      |      |      |
|-----|----------|------------------------------------------------|-----------------|-----------------------|--|--------|------|-----------------------|-------------------|------|------|------|
| 616 | pos_6344 | Lys Val Leu                                    | metab_5816      | -                     |  | 359.26 | 2.19 | M+H                   | C17H34N4O4        | 1.41 | 1.31 | 0.00 |
| 617 | pos_5673 | Ile Lys Leu                                    | metab_5078      | -                     |  | 373.28 | 3.19 | M+H                   | C18H36N4O4        | 1.45 | 1.31 | 0.00 |
| 618 | neg_5451 | Linalool 3,6-oxide<br>primeveroside            | metab_1236<br>1 | -                     |  | 463.22 | 4.34 | M-H                   | C21H36O11         | 1.39 | 1.31 | 0.02 |
| 619 | pos_5827 | Ile Gly Val                                    | metab_5249      | -                     |  | 288.19 | 2.95 | M+H                   | C13H25N3O4        | 1.42 | 1.32 | 0.00 |
| 620 | pos_2678 | 25-Hydroxyvitamin D2 25-<br>(beta-glucuronide) | metab_1813      | -                     |  | 627.33 | 3.03 | M+K                   | C34H52O8          | 1.47 | 1.32 | 0.00 |
| 621 | neg_6812 | Val Glu Asn Glu                                | metab_1379<br>9 | -                     |  | 488.20 | 2.38 | M-H                   | C19H31N5O10       | 1.56 | 1.32 | 0.00 |
| 622 | pos_2950 | Preladenant                                    | metab_2115      | -                     |  | 521.27 | 3.66 | M+NH4                 | C25H29N9O3        | 1.43 | 1.32 | 0.00 |
| 623 | pos_7435 | Thr Gly Arg                                    | metab_6966      | -                     |  | 333.19 | 0.62 | M+H                   | C12H24N6O5        | 1.36 | 1.32 | 0.01 |
| 624 | neg_6471 | Aminodeoxykanamycin                            | metab_1344<br>3 | 2251180.00            |  | 504.23 | 2.83 | M+Na-2H               | C18H37N5O10       | 1.57 | 1.32 | 0.01 |
| 625 | neg_1586 | Serylmethionine                                | metab_8257      | 484927.00             |  | 235.08 | 1.68 | M-H                   | C8H16N2O4S        | 1.48 | 1.32 | 0.04 |
| 626 | pos_509  | Prolyl-Gamma-glutamate                         | metab_4435      | -                     |  | 276.16 | 2.44 | M+CH3OH+<br>H, 2M+NH4 | C10H17N3O4        | 1.48 | 1.32 | 0.00 |
| 627 | neg_3417 | N-(3-Methylbut-2-EN-1-<br>YL)-9H-purin-6-amine | metab_1018<br>3 | -                     |  | 405.23 | 5.38 | 2M-H                  | C10H13N5          | 1.46 | 1.32 | 0.01 |
| 628 | pos_5674 | L-Isoleucine                                   | metab_5079      | 1509-34-<br>8;73-32-5 |  | 173.13 | 3.19 | M+ACN+H               | C6H13NO2          | 1.31 | 1.32 | 0.00 |
| 629 | neg_3222 | Semagacestat                                   | metab_9969      | -                     |  | 406.20 | 4.78 | M+FA-H                | C19H27N3O4        | 1.45 | 1.32 | 0.02 |
| 630 | neg_2282 | P-Chlorodisopyramide                           | metab_8965      | -                     |  | 372.19 | 2.96 | M-H                   | C21H28ClN3O       | 1.51 | 1.32 | 0.02 |
| 631 | pos_6039 | CDP-DG(PGD2/i-22:0)                            | metab_5484      | -                     |  | 578.80 | 2.60 | M+H+Na                | C54H93N3O18P<br>2 | 1.51 | 1.32 | 0.00 |
| 632 | pos_6037 | Val Lys Leu                                    | metab_5482      | -                     |  | 359.26 | 2.61 | M+H                   | C17H34N4O4        | 1.45 | 1.32 | 0.00 |
| 633 | neg_6044 | Beraprost                                      | metab_1300<br>8 | -                     |  | 433.18 | 3.37 | M+Cl                  | C24H30O5          | 1.40 | 1.32 | 0.03 |

|     |          |                                                   |             |             |        |      |                     |             |      |      |      |
|-----|----------|---------------------------------------------------|-------------|-------------|--------|------|---------------------|-------------|------|------|------|
| 634 | pos_5719 | Gly Leu Val                                       | metab_5129  | -           | 288.19 | 3.12 | M+H                 | C13H25N3O4  | 1.48 | 1.32 | 0.00 |
| 635 | neg_6547 | Bursopietin                                       | metab_13524 | -           | 360.18 | 2.73 | M+Na-2H             | C14H25N7O3  | 1.47 | 1.32 | 0.04 |
| 636 | neg_5688 | Rotundifoline                                     | metab_12618 | -           | 399.19 | 3.94 | M-H                 | C22H28N2O5  | 1.41 | 1.32 | 0.02 |
| 637 | pos_708  | Ile Gly Leu                                       | metab_6588  | -           | 302.21 | 3.84 | M+H, M+Na           | C14H27N3O4  | 1.43 | 1.33 | 0.00 |
| 638 | pos_5386 | Ile Glu Leu Lys                                   | metab_4761  | -           | 502.32 | 3.72 | M+H                 | C23H43N5O7  | 1.47 | 1.33 | 0.00 |
| 639 | pos_6767 | Dioxolane guanosine                               | metab_6258  | -           | 524.20 | 1.71 | 2M+NH4              | C9H11N5O4   | 1.49 | 1.33 | 0.00 |
| 640 | pos_5534 | Cyclic 3-Hydroxymelatonin                         | metab_4924  | -           | 281.15 | 3.43 | M+CH3OH+H           | C13H16N2O3  | 1.34 | 1.33 | 0.00 |
| 641 | pos_2498 | Tramadol                                          | metab_1616  | 27203-92-5  | 286.18 | 2.63 | M+Na                | C16H25NO2   | 1.49 | 1.33 | 0.00 |
| 642 | neg_6534 | (9S,10S)-10-hydroxy-9-(phosphonooxy)octadecanoate | metab_13511 | -           | 417.20 | 2.75 | M+Na-2H             | C18H37O7P   | 1.67 | 1.33 | 0.00 |
| 643 | pos_5722 | Val Glu Leu Asp                                   | metab_5133  | -           | 475.24 | 3.11 | M+H                 | C20H34N4O9  | 1.44 | 1.33 | 0.00 |
| 644 | pos_6744 | Laninamivir                                       | metab_6234  | 203120-17-6 | 388.18 | 1.76 | M+ACN+H             | C13H22N4O7  | 1.44 | 1.33 | 0.01 |
| 645 | neg_5750 | 17-Aminogeldanamycin                              | metab_12688 | -           | 544.26 | 3.85 | M-H                 | C28H39N3O8  | 1.55 | 1.33 | 0.02 |
| 646 | neg_2918 | Trilostane                                        | metab_9640  | 13647-35-3  | 350.17 | 4.11 | M+Na-2H             | C20H27NO3   | 1.56 | 1.33 | 0.01 |
| 647 | neg_7214 | 2-Methyl-2-oxazoline                              | metab_14207 | -           | 169.10 | 1.76 | 2M-H                | C4H7NO      | 1.47 | 1.33 | 0.01 |
| 648 | pos_3046 | Oxadixyl                                          | metab_2221  | 77732-09-3  | 320.16 | 3.93 | M+ACN+H             | C14H18N2O4  | 1.41 | 1.33 | 0.00 |
| 649 | neg_625  | Blasticidin S                                     | metab_13208 | 2079-00-7   | 403.18 | 2.11 | M-H2O-H,<br>M+Na-2H | C17H26N8O5  | 1.61 | 1.33 | 0.01 |
| 650 | pos_2533 | Ile Ile Lys                                       | metab_1656  | -           | 373.28 | 2.71 | M+H                 | C18H36N4O4  | 1.44 | 1.33 | 0.00 |
| 651 | pos_5958 | N(6)-L-Homocysteinyl-L-lysine                     | metab_5394  | -           | 544.30 | 2.72 | 2M+NH4              | C10H21N3O3S | 1.45 | 1.33 | 0.01 |

|     |          |                                                                               |                 |             |        |      |              |              |      |      |      |
|-----|----------|-------------------------------------------------------------------------------|-----------------|-------------|--------|------|--------------|--------------|------|------|------|
| 652 | neg_3450 | N-Acetyl-9-aminomincycline, (4R)-                                             | metab_1021<br>9 | -           | 432.18 | 5.51 | M+Cl         | C20H31NO7    | 1.62 | 1.33 | 0.00 |
| 653 | pos_3053 | Asn Ala Glu Val Leu                                                           | metab_2229      | -           | 545.29 | 3.95 | M+H          | C23H40N6O9   | 1.47 | 1.34 | 0.00 |
| 654 | pos_1835 | Gln Glu Ala                                                                   | metab_905       | -           | 347.16 | 1.14 | M+H          | C13H22N4O7   | 1.50 | 1.34 | 0.00 |
| 655 | pos_6688 | 5'-Deoxy-5-fluorocytidine                                                     | metab_6178      | -           | 278.12 | 1.86 | M+CH3OH+H    | C9H12FN3O4   | 1.35 | 1.34 | 0.02 |
| 656 | neg_5452 | 1-Piperidinyloxy, 4-(((dodecyloxy)hydroxyphosphinyl)oxy)-2,2,6,6-tetramethyl- | metab_1236<br>2 | -           | 442.27 | 4.34 | M+Na-2H      | C21H44NO5P   | 1.42 | 1.34 | 0.04 |
| 657 | pos_6751 | Cis-3-Hexenyl primeveroside                                                   | metab_6242      | 132278-37-6 | 412.22 | 1.73 | M+NH4        | C17H30O10    | 1.51 | 1.34 | 0.00 |
| 658 | neg_3395 | METHIONYL-LEUCYLPHENYLALANINE                                                 | metab_1015<br>9 | -           | 408.20 | 5.29 | M-H          | C20H31N3O4S  | 1.50 | 1.34 | 0.01 |
| 659 | pos_4805 | Neurotensin(1-11)                                                             | metab_4123      | -           | 723.88 | 5.34 | M+2H         | C66H99N19O18 | 1.49 | 1.34 | 0.00 |
| 660 | pos_5107 | Glu Phe Ile                                                                   | metab_4455      | -           | 408.21 | 4.34 | M+H          | C20H29N3O6   | 1.38 | 1.34 | 0.01 |
| 661 | pos_2804 | Heliotridine                                                                  | metab_1954      | 520-63-8    | 328.22 | 3.31 | 2M+NH4       | C8H13NO2     | 1.38 | 1.34 | 0.00 |
| 662 | pos_5632 | PA(10:0/PGF2alpha)                                                            | metab_5033      | -           | 701.35 | 3.25 | M+K          | C33H59O11P   | 1.49 | 1.34 | 0.01 |
| 663 | pos_5964 | L-Prolinamide, glycyl-L-prolyl-L-arginyl-(Z)-2-Methyl-2-butene-1,4-diol       | metab_5401      | -           | 389.24 | 2.71 | M+H-2H2O     | C18H32N8O4   | 1.47 | 1.34 | 0.00 |
| 664 | pos_2752 | 4-O-beta-D-Glucopyranoside                                                    | metab_1896      | -           | 546.28 | 3.17 | 2M+NH4       | C11H20O7     | 1.52 | 1.34 | 0.00 |
| 665 | neg_2618 | Z-FA-Fmk                                                                      | metab_9314      | -           | 771.32 | 3.52 | 2M-H         | C21H23FN2O4  | 1.51 | 1.34 | 0.02 |
| 666 | neg_379  | Cholylthreonine                                                               | metab_1057<br>2 | -           | 544.30 | 4.58 | M+Cl, M+K-2H | C28H47NO7    | 1.55 | 1.34 | 0.02 |

|     |          |                                                                                                      |                 |                                |        |      |                  |             |      |      |      |
|-----|----------|------------------------------------------------------------------------------------------------------|-----------------|--------------------------------|--------|------|------------------|-------------|------|------|------|
| 667 | neg_6644 | Eriojaposide B                                                                                       | metab_1362<br>6 | 351412-97-0                    | 561.25 | 2.58 | M+FA-H           | C25H40O11   | 1.63 | 1.34 | 0.01 |
| 668 | neg_2736 | Homoharringtonine                                                                                    | metab_9442      | -                              | 580.23 | 3.76 | M+Cl             | C29H39NO9   | 1.50 | 1.34 | 0.02 |
| 669 | neg_888  | 6-O-Desmethyldonepezil                                                                               | metab_1528<br>1 | -                              | 364.19 | 3.77 | M-H2O-H, M-H     | C23H27NO3   | 1.53 | 1.34 | 0.00 |
| 670 | pos_5181 | Ethinamate                                                                                           | metab_4537      | 126-52-3                       | 376.22 | 4.16 | 2M+ACN+H         | C9H13NO2    | 1.49 | 1.34 | 0.00 |
| 671 | pos_5177 | MURABUTIDE                                                                                           | metab_4532      | -                              | 590.30 | 4.17 | M+ACN+H          | C23H40N4O11 | 1.43 | 1.34 | 0.00 |
| 672 | pos_2846 | Mycophenolate mofetil                                                                                | metab_7668      | 24280-93-<br>1;128794-94-<br>5 | 475.24 | 3.39 | M+ACN+H          | C23H31NO7   | 1.47 | 1.34 | 0.00 |
| 673 | pos_733  | Leu Ser Ile                                                                                          | metab_6852      | -                              | 332.22 | 4.09 | M+H, M+Na        | C15H29N3O5  | 1.45 | 1.34 | 0.01 |
| 674 | pos_5870 | 7-Oxociguatoxin                                                                                      | metab_5297      | 263336-55-6                    | 564.29 | 2.88 | M+2H             | C60H86O20   | 1.47 | 1.34 | 0.00 |
| 675 | neg_5445 | PA(8:0/22:6(5Z,7Z,10Z,13Z,<br>16Z,19Z)-OH(4))                                                        | metab_1235<br>4 | -                              | 661.29 | 4.34 | M+K-2H           | C33H53O9P   | 1.47 | 1.35 | 0.00 |
| 676 | pos_5998 | Butenoylcarnitine                                                                                    | metab_5438      | -                              | 293.15 | 2.66 | M+ACN+Na         | C11H19NO4   | 1.44 | 1.35 | 0.00 |
| 677 | neg_7301 | 8beta-Angeloyloxy-15-<br>hydroxy-1alpha,10R-<br>dimethoxy-3-oxo-11(13)-<br>germacren-12,6alpha-olide | metab_1428<br>2 | -                              | 445.18 | 1.53 | M+Na-2H          | C22H32O8    | 1.65 | 1.35 | 0.00 |
| 678 | neg_2040 | Diacetoxyscirpenol                                                                                   | metab_8713      | 2270-40-8                      | 365.16 | 2.56 | M-H              | C19H26O7    | 1.47 | 1.35 | 0.03 |
| 679 | neg_855  | Valencic acid                                                                                        | metab_1524<br>5 | -                              | 617.28 | 3.56 | 2M+FA-H,<br>3M-H | C12H14O3    | 1.57 | 1.35 | 0.01 |
| 680 | pos_2383 | Gln Val Tyr                                                                                          | metab_1492      | -                              | 409.21 | 2.42 | M+H              | C19H28N4O6  | 1.48 | 1.35 | 0.00 |
| 681 | pos_5651 | Cortol                                                                                               | metab_5054      | 516-38-1                       | 401.29 | 3.23 | M+CH3OH+<br>H    | C21H36O5    | 1.47 | 1.35 | 0.00 |
| 682 | neg_1801 | Valylasparagine                                                                                      | metab_8464      | 66170-00-1                     | 230.11 | 2.08 | M-H              | C9H17N3O4   | 1.58 | 1.35 | 0.01 |

|     |          |                                                                 |                 |                          |        |      |                  |                   |      |      |      |
|-----|----------|-----------------------------------------------------------------|-----------------|--------------------------|--------|------|------------------|-------------------|------|------|------|
| 683 | neg_7409 | D-ononitol                                                      | metab_1438<br>8 | 6090-97-<br>7;24333-07-1 | 433.16 | 1.22 | 2M+FA-H          | C7H14O6           | 1.67 | 1.35 | 0.00 |
| 684 | pos_5972 | Thr Glu Ile                                                     | metab_5410      | -                        | 362.19 | 2.70 | M+H              | C15H27N3O7        | 1.55 | 1.35 | 0.00 |
| 685 | neg_7218 | Asparaginy-Methionine                                           | metab_1420<br>9 | -                        | 262.09 | 1.74 | M-H              | C9H17N3O4S        | 1.56 | 1.35 | 0.01 |
| 686 | pos_5695 | DG(10:0/20:5(5Z,8Z,11Z,14Z,16E)-OH(18R)/0:0)<br>Ethyl 7-epi-12- | metab_5102      | -                        | 585.36 | 3.15 | M+K              | C33H54O6          | 1.62 | 1.35 | 0.00 |
| 687 | pos_5975 | hydroxyjasmonate<br>glucoside                                   | metab_5413      | -                        | 381.19 | 2.69 | M+H-2H2O         | C20H32O9          | 1.41 | 1.35 | 0.01 |
| 688 | neg_2496 | PA(PGD1/10:0)                                                   | metab_9182      | -                        | 697.35 | 3.27 | M+Cl             | C33H59O11P        | 1.53 | 1.35 | 0.02 |
| 689 | neg_6313 | Nonylurea                                                       | metab_1327<br>7 | -                        | 185.17 | 3.03 | M-H              | C10H22N2O         | 1.38 | 1.35 | 0.02 |
| 690 | pos_5412 | CDP-<br>DG(22:6(4Z,8Z,10Z,13Z,16Z,19Z)-OH(7)/i-22:0)            | metab_4791      | -                        | 563.81 | 3.66 | M+2H             | C56H93N3O16P<br>2 | 1.44 | 1.35 | 0.01 |
| 691 | pos_5555 | Apramycin                                                       | metab_4947      | 37321-09-8               | 504.27 | 3.39 | M+H-2H2O         | C21H41N5O11       | 1.54 | 1.35 | 0.01 |
| 692 | neg_4964 | 1-(13Z,16Z-docosadienoyl)-<br>glycero-3-phosphate<br>1-         | metab_1182<br>9 | -                        | 471.28 | 5.54 | M-H2O-H          | C25H47O7P         | 1.59 | 1.36 | 0.01 |
| 693 | neg_396  | [Fluoro(methoxy)phosphor<br>yl]oxyicosa-5,8,11,14-<br>tetraene  | metab_1074<br>8 | -                        | 421.21 | 4.91 | M+Cl, M+K-<br>2H | C21H36FO3P        | 1.52 | 1.36 | 0.02 |
| 694 | pos_5988 | Labetalol                                                       | metab_5427      | 36894-69-6               | 351.17 | 2.67 | M+Na             | C19H24N2O3        | 1.43 | 1.36 | 0.01 |
| 695 | pos_5511 | Arg Leu Phe                                                     | metab_4899      | -                        | 435.27 | 3.46 | M+H              | C21H34N6O4        | 1.43 | 1.36 | 0.01 |
| 696 | neg_3012 | DG(20:4(6E,8Z,11Z,13E)-<br>2OH(5S,15S)/2:0/0:0)                 | metab_9742      | -                        | 497.27 | 4.29 | M+FA-H           | C25H40O7          | 1.53 | 1.36 | 0.02 |

|     |          |                                                 |             |                   |        |      |                         |             |      |      |      |
|-----|----------|-------------------------------------------------|-------------|-------------------|--------|------|-------------------------|-------------|------|------|------|
| 697 | neg_5408 | Ala Gly Leu Val Ser                             | metab_12316 | -                 | 444.25 | 4.41 | M-H                     | C19H35N5O7  | 1.55 | 1.36 | 0.02 |
|     |          | 4(1H)-Pyridinone, 2-ethyl-                      |             |                   |        |      |                         |             |      |      |      |
| 698 | pos_4763 | 3-hydroxy-1-(2-hydroxyethyl)-                   | metab_4077  | -                 | 430.19 | 5.47 | 2M+ACN+Na               | C9H13NO3    | 1.38 | 1.36 | 0.00 |
| 699 | pos_6655 | Gamma-Glutamyl-beta-aminopropionitrile          | metab_6145  | -                 | 232.13 | 1.89 | M+CH3OH+H               | C8H13N3O3   | 1.48 | 1.36 | 0.00 |
| 700 | pos_2049 | Gly Leu Arg                                     | metab_1135  | -                 | 345.22 | 1.78 | M+H                     | C14H28N6O4  | 1.55 | 1.36 | 0.00 |
| 701 | pos_3207 | Leu-leu-ome                                     | metab_2399  | -                 | 259.20 | 4.45 | M+H                     | C13H26N2O3  | 1.47 | 1.36 | 0.00 |
| 702 | neg_2767 | 2-Benzyl-2-hydroxybutanamide                    | metab_9474  | -                 | 445.23 | 3.82 | 2M+Hac-H                | C11H15NO2   | 1.51 | 1.36 | 0.03 |
| 703 | pos_2263 | Leu Glu Lys Glu                                 | metab_1364  | -                 | 518.28 | 2.18 | M+H                     | C22H39N5O9  | 1.49 | 1.36 | 0.00 |
| 704 | pos_571  | Docebenone                                      | metab_5119  | 80809-81-0        | 716.39 | 2.82 | M+CH3OH+H,<br>2M+ACN+Na | C21H26O3    | 1.49 | 1.36 | 0.01 |
| 705 | pos_2252 | Kanamycin                                       | metab_7663  | 59-01-8;8063-07-8 | 449.22 | 2.14 | M+H-2H2O                | C18H36N4O11 | 1.47 | 1.36 | 0.01 |
| 706 | pos_2946 | Gln Ile Ile                                     | metab_2110  | -                 | 373.24 | 3.65 | M+H                     | C17H32N4O5  | 1.47 | 1.36 | 0.00 |
| 707 | pos_4158 | SM(d18:0/16:1(9Z))                              | metab_3427  | -                 | 703.57 | 7.00 | M+H                     | C39H79N2O6P | 1.28 | 1.36 | 0.00 |
| 708 | pos_3199 | Isoforskolin                                    | metab_2389  | -                 | 393.22 | 4.43 | M+H-H2O                 | C22H34O7    | 1.37 | 1.36 | 0.02 |
| 709 | neg_5904 | 2-dehydropantoate                               | metab_12854 | -                 | 437.17 | 3.59 | 3M-H                    | C6H10O4     | 1.51 | 1.37 | 0.02 |
| 710 | neg_5194 | 1,2-Dihexanoyl-sn-glycero-3-phosphoethanolamine | metab_12082 | -                 | 392.18 | 4.88 | M-H2O-H                 | C17H34NO8P  | 1.42 | 1.37 | 0.03 |
| 711 | pos_5392 | Leu Lys Phe                                     | metab_4768  | -                 | 407.26 | 3.71 | M+H                     | C21H34N4O4  | 1.43 | 1.37 | 0.00 |
| 712 | pos_5948 | Gln Leu Thr Asp                                 | metab_5383  | -                 | 476.23 | 2.74 | M+H                     | C19H33N5O9  | 1.48 | 1.37 | 0.01 |

|     |          |                                                            |                 |             |        |      |                            |                                                                  |      |      |      |
|-----|----------|------------------------------------------------------------|-----------------|-------------|--------|------|----------------------------|------------------------------------------------------------------|------|------|------|
| 713 | neg_3325 | Antiarrhythmic peptide                                     | metab_1008<br>3 | -           | 451.20 | 5.06 | M-H <sub>2</sub> O-H       | C <sub>19</sub> H <sub>30</sub> N <sub>6</sub> O <sub>8</sub>    | 1.67 | 1.37 | 0.00 |
| 714 | pos_562  | Ala Thr Leu Asp                                            | metab_5019      | -           | 419.21 | 2.67 | M+H,<br>M+ACN+H            | C <sub>17</sub> H <sub>30</sub> N <sub>4</sub> O <sub>8</sub>    | 1.59 | 1.37 | 0.00 |
| 715 | neg_5308 | Nelfinavir                                                 | metab_1220<br>6 | 159989-64-7 | 588.29 | 4.62 | M+Na-2H                    | C <sub>32</sub> H <sub>45</sub> N <sub>3</sub> O <sub>4</sub> S  | 1.57 | 1.37 | 0.01 |
| 716 | neg_5263 | Tryptophyl-Glycine                                         | metab_1215<br>7 | -           | 521.22 | 4.72 | 2M-H                       | C <sub>13</sub> H <sub>15</sub> N <sub>3</sub> O <sub>3</sub>    | 1.53 | 1.37 | 0.01 |
| 717 | pos_5617 | Val Asp Leu                                                | metab_5016      | -           | 346.20 | 3.29 | M+H                        | C <sub>15</sub> H <sub>27</sub> N <sub>3</sub> O <sub>6</sub>    | 1.57 | 1.37 | 0.00 |
| 718 | neg_3011 | 10,11-dihydro-20-<br>trihydroxy-leukotriene B <sub>4</sub> | metab_9741      | -           | 431.23 | 4.29 | M+FA-H                     | C <sub>20</sub> H <sub>34</sub> O <sub>7</sub>                   | 1.51 | 1.37 | 0.03 |
| 719 | pos_5453 | S-(PGA <sub>2</sub> )-glutathione                          | metab_4836      | -           | 659.33 | 3.57 | M+NH <sub>4</sub>          | C <sub>30</sub> H <sub>47</sub> N <sub>3</sub> O <sub>10</sub> S | 1.53 | 1.37 | 0.01 |
| 720 | neg_3131 | MG(LTE <sub>4</sub> /0:0/0:0)                              | metab_9870      | -           | 558.28 | 4.53 | M+FA-H                     | C <sub>26</sub> H <sub>43</sub> NO <sub>7</sub> S                | 1.58 | 1.37 | 0.02 |
| 721 | pos_2503 | PI(TXB <sub>2</sub> /16:0)                                 | metab_1623      | -           | 474.26 | 2.63 | M+H+Na                     | C <sub>45</sub> H <sub>81</sub> O <sub>17</sub> P                | 1.60 | 1.37 | 0.00 |
| 722 | pos_5443 | Antibiotic A 204A                                          | metab_4825      | -           | 495.27 | 3.59 | M+2Na                      | C <sub>49</sub> H <sub>84</sub> O <sub>17</sub>                  | 1.54 | 1.37 | 0.00 |
| 723 | neg_2895 | 7-Sulfocholic acid                                         | metab_9614      | 60320-05-0  | 487.24 | 4.06 | M-H                        | C <sub>24</sub> H <sub>40</sub> O <sub>8</sub> S                 | 1.58 | 1.37 | 0.03 |
| 724 | neg_5175 | Oleuropein                                                 | metab_1206<br>2 | 32619-42-4  | 539.18 | 4.92 | M-H                        | C <sub>25</sub> H <sub>32</sub> O <sub>13</sub>                  | 1.80 | 1.37 | 0.00 |
| 725 | neg_6970 | (2R,3R,4R)-Hexane-<br>1,2,3,4,6-pentol<br>8-               | metab_1395<br>6 | -           | 331.16 | 2.10 | 2M-H                       | C <sub>6</sub> H <sub>14</sub> O <sub>5</sub>                    | 1.67 | 1.37 | 0.01 |
| 726 | pos_3371 | methylthiooctyl-desulfogluc<br>osinolate                   | metab_2581      | -           | 430.19 | 5.28 | M+CH <sub>3</sub> OH+<br>H | C <sub>16</sub> H <sub>31</sub> NO <sub>6</sub> S <sub>2</sub>   | 1.46 | 1.37 | 0.00 |
| 727 | pos_1896 | Astromicin                                                 | metab_971       | 55779-06-1  | 388.25 | 1.31 | M+H-H <sub>2</sub> O       | C <sub>17</sub> H <sub>35</sub> N <sub>5</sub> O <sub>6</sub>    | 1.50 | 1.37 | 0.00 |
| 728 | neg_5857 | Floratheasaponin E                                         | metab_1280<br>2 | -           | 642.31 | 3.67 | M-2H                       | C <sub>63</sub> H <sub>98</sub> O <sub>27</sub>                  | 1.54 | 1.37 | 0.02 |

|     |          |                                                                          |                 |          |        |      |                  |             |      |      |      |
|-----|----------|--------------------------------------------------------------------------|-----------------|----------|--------|------|------------------|-------------|------|------|------|
| 729 | neg_742  | Glycylproline                                                            | metab_1439<br>8 | 704-15-4 | 515.25 | 2.91 | 2M+FA-H,<br>3M-H | C7H12N2O3   | 1.59 | 1.38 | 0.01 |
| 730 | pos_3224 | (2S)-2-(2-Benzamidoethylamino)-5-(diaminomethylideneamino)pentanoic acid | metab_2418      | -        | 660.39 | 4.50 | 2M+NH4           | C15H23N5O3  | 1.58 | 1.38 | 0.00 |
| 731 | pos_2716 | Chakasaponin V                                                           | metab_1856      | -        | 644.32 | 3.11 | M+2H             | C63H98O27   | 1.58 | 1.38 | 0.00 |
| 732 | neg_3275 | PC(2:0/PGF1alpha)                                                        | metab_1002<br>7 | -        | 672.32 | 4.91 | M+Cl             | C30H56NO11P | 1.60 | 1.38 | 0.01 |
| 733 | pos_2809 | PS(22:4(7Z,10Z,13Z,16Z)/22:5(7Z,10Z,13Z,16Z,19Z))                        | metab_1959      | -        | 465.77 | 3.31 | M+2Na            | C50H80NO10P | 1.51 | 1.38 | 0.01 |
| 734 | neg_1491 | Kuguacin B                                                               | metab_8164      | -        | 417.16 | 1.35 | M-H              | C25H23FN2O3 | 1.66 | 1.38 | 0.01 |
| 735 | pos_3187 | Phe Ser Ile                                                              | metab_2376      | -        | 366.20 | 4.37 | M+H              | C18H27N3O5  | 1.42 | 1.38 | 0.00 |
| 736 | pos_4954 | Ile Ile Leu                                                              | metab_4286      | -        | 358.27 | 4.76 | M+H              | C18H35N3O4  | 1.51 | 1.38 | 0.00 |
| 737 | neg_6050 | Isofloxythepin                                                           | metab_1301<br>5 | -        | 445.19 | 3.36 | M+FA-H           | C23H29FN2OS | 1.60 | 1.39 | 0.02 |
| 738 | pos_2128 | Asn Ile Gln                                                              | metab_1219      | -        | 374.20 | 1.94 | M+H              | C15H27N5O6  | 1.53 | 1.39 | 0.00 |
| 739 | neg_7441 | Oxiracetam                                                               | metab_1442<br>0 | -        | 375.15 | 1.14 | 2M+Hac-H         | C6H10N2O3   | 1.62 | 1.39 | 0.01 |
| 740 | neg_5954 | 4-Aminohex-5-ynoic acid                                                  | metab_1290<br>9 | -        | 380.18 | 3.52 | 3M-H             | C6H9NO2     | 1.54 | 1.39 | 0.01 |
| 741 | neg_6963 | 2-Amino-3-methyl-1-pyrrolidin-1-yl-butan-1-one                           | metab_1394<br>8 | -        | 215.14 | 2.10 | M+FA-H           | C9H18N2O    | 1.56 | 1.39 | 0.01 |
| 742 | neg_5349 | Implitapide                                                              | metab_1225<br>1 | -        | 530.28 | 4.53 | M-H              | C35H37N3O2  | 1.56 | 1.39 | 0.04 |



|     |          |                                                                |                     |             |        |      |           |             |      |      |      |
|-----|----------|----------------------------------------------------------------|---------------------|-------------|--------|------|-----------|-------------|------|------|------|
| 743 | neg_5456 | Actein                                                         | metab_12366         | -           | 697.35 | 4.33 | M+Na-2H   | C37H56O11   | 1.54 | 1.39 | 0.01 |
| 744 | neg_6586 | Gln Val Asp Glu                                                | metab_13564         | -           | 488.20 | 2.68 | M-H       | C19H31N5O10 | 1.70 | 1.39 | 0.00 |
| 745 | pos_5455 | APGPR Enterostatin                                             | metab_4837          | 117830-79-2 | 461.26 | 3.57 | M+H-2H2O  | C21H36N8O6  | 1.51 | 1.39 | 0.00 |
| 746 | pos_5855 | Lys Ile Leu                                                    | metab_5280          | -           | 373.28 | 2.91 | M+H       | C18H36N4O4  | 1.50 | 1.39 | 0.01 |
| 747 | pos_4953 | Calpeptin                                                      | metab_4285          | 117591-20-5 | 380.25 | 4.76 | M+NH4     | C20H30N2O4  | 1.37 | 1.40 | 0.02 |
| 748 | pos_4817 | Glu Phe Leu                                                    | metab_4135          | -           | 408.21 | 5.28 | M+H       | C20H29N3O6  | 1.45 | 1.40 | 0.00 |
| 749 | pos_1125 | Val Ile Ile                                                    | metab_140           | -           | 344.25 | 4.31 | M+H, M+Na | C17H33N3O4  | 1.54 | 1.40 | 0.00 |
| 750 | pos_6759 | Gly Lys Ile                                                    | metab_6250          | -           | 317.22 | 1.72 | M+H       | C14H28N4O4  | 1.59 | 1.40 | 0.00 |
| 751 | pos_5274 | DG(6<br>PGF1alpha/0:0/2:0)                                     | keto-<br>metab_4638 | -           | 504.32 | 3.96 | M+NH4     | C25H42O9    | 1.61 | 1.40 | 0.00 |
| 752 | neg_6455 | Linatine                                                       | metab_13430         | 10139-06-7  | 517.23 | 2.84 | 2M-H      | C10H17N3O5  | 1.65 | 1.40 | 0.00 |
| 753 | neg_7057 | Amabiline                                                      | metab_14047         | 17958-43-9  | 304.15 | 2.03 | M+Na-2H   | C15H25NO4   | 1.70 | 1.40 | 0.00 |
| 754 | pos_2766 | [(2S,3R)-2-Amino-3-hydroxybutanoyl]pyrrolidine-2-carboxylate   | (2S)-<br>metab_1911 | -           | 474.26 | 3.21 | 2M+ACN+H  | C9H16N2O4   | 1.59 | 1.40 | 0.01 |
| 755 | pos_3143 | Prolyl-Valine                                                  | metab_2329          | -           | 451.25 | 4.24 | 2M+Na     | C10H18N2O3  | 1.47 | 1.40 | 0.01 |
| 756 | pos_2641 | 1-Methyladenosine                                              | metab_1774          | 15763-06-1  | 580.26 | 2.94 | 2M+NH4    | C11H15N5O4  | 1.58 | 1.40 | 0.00 |
| 757 | neg_2588 | Desacetoxyvindoline                                            | metab_9282          | -           | 841.44 | 3.46 | 2M+FA-H   | C23H30N2O4  | 1.66 | 1.40 | 0.01 |
| 758 | pos_6819 | Cinn cassiol C3                                                | metab_6309          | 64979-94-8  | 383.20 | 1.61 | M+H       | C20H30O7    | 1.53 | 1.40 | 0.00 |
| 759 | neg_4921 | (3R)-Acetoxy-(5S)-hydroxy-1-(4-hydroxy-3-methoxyphenyl)-decane | metab_11782         | -           | 359.18 | 5.59 | M+Na-2H   | C19H30O5    | 1.54 | 1.40 | 0.02 |
| 760 | pos_2587 | Cilligen                                                       | metab_1714          | -           | 504.23 | 2.81 | M+ACN+H   | C22H30N4O5S | 1.55 | 1.41 | 0.01 |

|     |          |                                                            |             |             |        |      |                                                  |                                                                  |      |      |      |
|-----|----------|------------------------------------------------------------|-------------|-------------|--------|------|--------------------------------------------------|------------------------------------------------------------------|------|------|------|
| 761 | pos_4829 | Cepharanthine                                              | metab_4148  | 481-49-2    | 620.28 | 5.20 | 2M+3H <sub>2</sub> O+2H                          | C <sub>37</sub> H <sub>38</sub> N <sub>2</sub> O <sub>6</sub>    | 1.59 | 1.41 | 0.00 |
| 762 | pos_99   | Buprenorphine 3-beta-D-Glucuronide                         | metab_7635  | -           | 685.38 | 4.37 | M+ACN+H,<br>M+ACN+Na,<br>2M+3H <sub>2</sub> O+2H | C <sub>35</sub> H <sub>49</sub> NO <sub>10</sub>                 | 1.66 | 1.41 | 0.00 |
| 763 | neg_3228 | Cucurbitacin D                                             | metab_9975  | 3877-86-9   | 553.26 | 4.80 | M+K-2H                                           | C <sub>30</sub> H <sub>44</sub> O <sub>7</sub>                   | 1.67 | 1.41 | 0.00 |
| 764 | neg_5387 | PGP(18:2(10E,12Z)+=O(9)/16:1(9Z))                          | metab_12293 | -           | 883.44 | 4.44 | M+FA-H                                           | C <sub>40</sub> H <sub>72</sub> O <sub>14</sub> P <sub>2</sub>   | 1.65 | 1.41 | 0.01 |
| 765 | pos_5282 | Ile Asp Ile                                                | metab_4647  | -           | 360.21 | 3.95 | M+H                                              | C <sub>16</sub> H <sub>29</sub> N <sub>3</sub> O <sub>6</sub>    | 1.55 | 1.41 | 0.00 |
| 766 | neg_2432 | Farnesylcysteine                                           | metab_9120  | 68000-92-0  | 360.18 | 3.18 | M+Cl                                             | C <sub>18</sub> H <sub>31</sub> NO <sub>2</sub> S                | 1.73 | 1.41 | 0.01 |
| 767 | pos_6732 | Ala Ile Arg                                                | metab_6222  | -           | 359.24 | 1.81 | M+H                                              | C <sub>15</sub> H <sub>30</sub> N <sub>6</sub> O <sub>4</sub>    | 1.63 | 1.41 | 0.00 |
| 768 | neg_5299 | S-(PGA1)-glutathione                                       | metab_12195 | -           | 688.32 | 4.63 | M+FA-H                                           | C <sub>30</sub> H <sub>49</sub> N <sub>3</sub> O <sub>10</sub> S | 1.62 | 1.41 | 0.02 |
| 769 | pos_350  | 4-[(Hydroxymethyl)nitrosoamino]-1-(3-pyridinyl)-1-butanone | metab_2724  | -           | 447.20 | 1.51 | M+ACN+Na,<br>2M+H                                | C <sub>10</sub> H <sub>13</sub> N <sub>3</sub> O <sub>3</sub>    | 1.64 | 1.41 | 0.00 |
| 770 | pos_5625 | Capecitabine                                               | metab_5025  | 154361-50-9 | 377.18 | 3.27 | M+NH <sub>4</sub>                                | C <sub>15</sub> H <sub>22</sub> FN <sub>3</sub> O <sub>6</sub>   | 1.55 | 1.42 | 0.01 |
| 771 | pos_6821 | Ectoine                                                    | metab_6312  | 96702-03-3  | 326.18 | 1.61 | 2M+ACN+H                                         | C <sub>6</sub> H <sub>10</sub> N <sub>2</sub> O <sub>2</sub>     | 1.59 | 1.42 | 0.00 |
| 772 | pos_5121 | Leu Glu Ile                                                | metab_4471  | -           | 374.23 | 4.31 | M+H                                              | C <sub>17</sub> H <sub>31</sub> N <sub>3</sub> O <sub>6</sub>    | 1.54 | 1.42 | 0.00 |
| 773 | pos_5292 | Phe Asp Ile Glu                                            | metab_4658  | -           | 523.24 | 3.92 | M+H                                              | C <sub>24</sub> H <sub>34</sub> N <sub>4</sub> O <sub>9</sub>    | 1.55 | 1.42 | 0.01 |
| 774 | neg_2537 | Glaucarubin                                                | metab_9226  | 1448-23-3   | 541.23 | 3.35 | M+FA-H                                           | C <sub>25</sub> H <sub>36</sub> O <sub>10</sub>                  | 1.68 | 1.42 | 0.00 |
| 775 | pos_5145 | 4-Hydroxypropranolol glucuronide                           | metab_4497  | -           | 920.40 | 4.25 | 2M+NH <sub>4</sub>                               | C <sub>22</sub> H <sub>29</sub> NO <sub>9</sub>                  | 1.47 | 1.42 | 0.04 |
| 776 | pos_5228 | Leu Asp Leu                                                | metab_4587  | -           | 360.21 | 4.07 | M+H                                              | C <sub>16</sub> H <sub>29</sub> N <sub>3</sub> O <sub>6</sub>    | 1.56 | 1.42 | 0.00 |
| 777 | neg_2431 | 5-Hydroxylysine                                            | metab_9119  | -           | 312.16 | 3.18 | M+Na-2H                                          | C <sub>12</sub> H <sub>25</sub> N <sub>3</sub> O <sub>5</sub>    | 1.61 | 1.42 | 0.01 |

|     |          |                                              |              |             |        |      |           |            |      |      |      |
|-----|----------|----------------------------------------------|--------------|-------------|--------|------|-----------|------------|------|------|------|
| 778 | pos_5327 | Hydroxypropyl-Valine                         | metab_4697   | -           | 502.29 | 3.84 | 2M+ACN+H  | C10H18N2O4 | 1.55 | 1.42 | 0.01 |
| 779 | pos_5465 | 9,13-Dihydroxy-4-megastigmen-3-one glucoside | 9-metab_4848 | 188305-07-9 | 421.24 | 3.55 | M+CH3OH+H | C19H32O8   | 1.39 | 1.42 | 0.03 |
| 780 | neg_5357 | Kinetensin 4-7                               | metab_12260  | 138482-56-1 | 592.26 | 4.50 | M+Na-2H   | C26H37N9O6 | 1.73 | 1.42 | 0.00 |
| 781 | pos_6008 | Val Glu Val                                  | metab_5451   | -           | 346.20 | 2.64 | M+H       | C15H27N3O6 | 1.60 | 1.42 | 0.01 |
| 782 | neg_2719 | Garcinol                                     | metab_9423   | 78824-30-3  | 583.35 | 3.72 | M-H2O-H   | C38H50O6   | 1.76 | 1.42 | 0.00 |
| 783 | pos_2705 | Gentamicin C2                                | metab_1844   | 25876-11-3  | 486.29 | 3.09 | M+Na      | C20H41N5O7 | 1.62 | 1.43 | 0.00 |
| 784 | pos_781  | Asn Phe Trp                                  | metab_7376   | -           | 466.21 | 4.60 | M+H, M+Na | C24H27N5O5 | 1.51 | 1.43 | 0.00 |
| 785 | neg_5374 | 10,11-Dihydro-12R-hydroxy-leukotriene E4     | metab_12279  | -           | 502.25 | 4.48 | M+FA-H    | C23H39NO6S | 1.69 | 1.43 | 0.02 |
| 786 | pos_5926 | Thr Pro Ile                                  | metab_5359   | -           | 330.20 | 2.77 | M+H       | C15H27N3O5 | 1.46 | 1.43 | 0.04 |
| 787 | pos_5397 | Val Val Ile                                  | metab_4773   | -           | 330.24 | 3.70 | M+H       | C16H31N3O4 | 1.53 | 1.43 | 0.00 |
| 788 | pos_2586 | Pyridinoline                                 | metab_1713   | 63800-01-1  | 461.22 | 2.81 | M+CH3OH+H | C18H28N4O8 | 1.61 | 1.43 | 0.01 |
| 789 | pos_5817 | N-Eicosapentaenoyl Proline                   | metab_5238   | -           | 444.24 | 2.97 | M+2Na-H   | C25H37NO3  | 1.58 | 1.43 | 0.01 |
| 790 | pos_3059 | Ile Gly Ile                                  | metab_2235   | -           | 302.21 | 3.97 | M+H       | C14H27N3O4 | 1.60 | 1.43 | 0.01 |
| 791 | pos_3084 | Dimerum acid                                 | metab_2263   | -           | 502.29 | 4.05 | M+NH4     | C22H36N4O8 | 1.56 | 1.43 | 0.01 |
| 792 | pos_786  | Val Phe Ile                                  | metab_7410   | -           | 378.24 | 4.63 | M+H, M+Na | C20H31N3O4 | 1.54 | 1.43 | 0.00 |
| 793 | pos_3284 | Val Phe Phe                                  | metab_2484   | -           | 412.22 | 4.79 | M+H       | C23H29N3O4 | 1.51 | 1.43 | 0.00 |
| 794 | neg_3198 | 5-O-Desmethyldonepezil                       | metab_9941   | -           | 364.19 | 4.71 | M-H       | C23H27NO3  | 1.62 | 1.43 | 0.01 |
| 795 | pos_846  | Gly Leu Phe                                  | metab_7477   | -           | 336.19 | 4.52 | M+H, M+Na | C17H25N3O4 | 1.52 | 1.44 | 0.01 |
| 796 | pos_5858 | Rigin                                        | metab_5283   | 77727-17-4  | 520.26 | 2.90 | M+ACN+Na  | C18H32N8O6 | 1.64 | 1.44 | 0.00 |
| 797 | pos_5636 | 17a-Ethynylestradiol                         | metab_5037   | 57-63-6     | 360.19 | 3.25 | M+ACN+Na  | C20H24O2   | 1.60 | 1.44 | 0.00 |
| 798 | pos_7022 | Glycylprolylarginine                         | metab_6528   | -           | 329.19 | 1.12 | M+H       | C13H24N6O4 | 1.64 | 1.44 | 0.00 |

|     |          |                                                                           |                 |             |        |      |           |            |      |      |      |
|-----|----------|---------------------------------------------------------------------------|-----------------|-------------|--------|------|-----------|------------|------|------|------|
| 799 | neg_5395 | Bisphenol B                                                               | metab_1230<br>2 | 77-40-7     | 543.28 | 4.43 | 2M+Hac-H  | C16H18O2   | 1.68 | 1.44 | 0.01 |
| 800 | neg_1926 | 4-[(2R,5R)-5-(6-Aminopurin-9-yl)-3,4-dihydroxyoxolan-2-yl]butanamide      | metab_8590      | -           | 703.29 | 2.36 | 2M+Hac-H  | C13H18N6O4 | 1.75 | 1.45 | 0.00 |
| 801 | pos_2646 | (1(10)E,4a,5E)-1(10),5-Germacradiene-12-acetoxy-4,11-diol                 | metab_1779      | 143305-08-2 | 615.38 | 2.96 | 2M+Na     | C17H28O4   | 1.65 | 1.45 | 0.00 |
| 802 | pos_5456 | 3-Isobutyl-1-methylxanthine                                               | metab_4838      | -           | 508.24 | 3.56 | 2M+ACN+Na | C10H14N4O2 | 1.56 | 1.45 | 0.01 |
| 803 | neg_3058 | 3-Benzyl-5-(6-carboxyhexyl)-1-(2-cyclohexyl-2-hydroxyethylamino)hydantoin | metab_9788      | -           | 440.25 | 4.37 | M-H2O-H   | C25H37N3O5 | 1.68 | 1.45 | 0.02 |
| 804 | pos_7115 | S-Triazine, 2-amino-4-((4-methyl-1-piperazinyl)methyl)-6-piperidino-      | metab_6627      | -           | 274.21 | 0.98 | M+H-H2O   | C14H25N7   | 1.63 | 1.45 | 0.01 |
| 805 | pos_2801 | Dynorphin A (6-8)                                                         | metab_1951      | -           | 488.27 | 3.30 | M+2Na-H   | C18H37N9O4 | 1.62 | 1.45 | 0.01 |
| 806 | pos_749  | Ala Ile Phe                                                               | metab_7025      | -           | 350.21 | 4.25 | M+H, M+Na | C18H27N3O4 | 1.52 | 1.45 | 0.01 |
| 807 | pos_5479 | Prolylproline                                                             | metab_4863      | 20488-28-2  | 442.27 | 3.52 | 2M+NH4    | C10H16N2O3 | 1.60 | 1.45 | 0.00 |
| 808 | pos_3114 | Leu Glu Leu                                                               | metab_2297      | -           | 374.23 | 4.16 | M+H       | C17H31N3O6 | 1.58 | 1.45 | 0.01 |
| 809 | neg_5687 | 1-heptadecanoyl-glycero-3-phosphate                                       | metab_1261<br>7 | -           | 461.21 | 3.94 | M+K-2H    | C20H41O7P  | 1.70 | 1.45 | 0.01 |
| 810 | neg_1733 | Dihydrozeatin-O-glucoside                                                 | metab_8394      | 62512-96-3  | 382.17 | 2.00 | M-H       | C16H25N5O6 | 1.71 | 1.45 | 0.00 |

|     |          |                                                        |     |                 |             |        |      |               |              |      |      |      |
|-----|----------|--------------------------------------------------------|-----|-----------------|-------------|--------|------|---------------|--------------|------|------|------|
| 811 | pos_3438 | Ganglioside<br>(d18:1/9Z-18:1)                         | GD3 | metab_2655      | -           | 757.91 | 5.50 | M+2Na         | C70H123N3O29 | 1.64 | 1.45 | 0.00 |
| 812 | neg_4966 | Goshonoside F6                                         |     | metab_1183<br>1 | 138614-60-5 | 615.34 | 5.54 | M-H           | C31H52O12    | 1.74 | 1.45 | 0.00 |
| 813 | neg_5424 | (2Z)-2-(3-<br>Phenylpropoxyimino)buta<br>noic acid     |     | metab_1233<br>4 | -           | 469.23 | 4.38 | 2M-H          | C13H17NO3    | 1.68 | 1.45 | 0.00 |
| 814 | neg_5289 | Hordatine B                                            |     | metab_1218<br>4 | 10502-21-3  | 617.26 | 4.66 | M+K-2H        | C29H40N8O5   | 1.68 | 1.46 | 0.01 |
| 815 | pos_2698 | Ile Lys Ile                                            |     | metab_1835      | -           | 373.28 | 3.08 | M+H           | C18H36N4O4   | 1.57 | 1.46 | 0.00 |
| 816 | pos_3209 | Vaniprevir                                             |     | metab_2401      | -           | 780.35 | 4.46 | M+Na          | C38H55N5O9S  | 1.57 | 1.46 | 0.03 |
| 817 | neg_6512 | ((4-(4-<br>Amidinophenoxy)butanoyl<br>)aspartyl)valine |     | metab_1348<br>7 | -           | 481.19 | 2.77 | M+FA-H        | C20H28N4O7   | 1.70 | 1.46 | 0.01 |
| 818 | pos_5734 | Threoninyl-Valine                                      |     | metab_5146      | 99032-17-4  | 500.27 | 3.10 | 2M+ACN+Na     | C9H18N2O4    | 1.64 | 1.46 | 0.00 |
| 819 | pos_5621 | Etiracetam                                             |     | metab_5021      | 102767-28-2 | 382.24 | 3.28 | 2M+ACN+H      | C8H14N2O2    | 1.56 | 1.46 | 0.01 |
| 820 | pos_5195 | 20-Hydroxy-leukotriene E4                              |     | metab_4551      | 111844-33-8 | 488.27 | 4.13 | M+CH3OH+<br>H | C23H37NO6S   | 1.58 | 1.46 | 0.01 |
| 821 | neg_5416 | Chymostatin                                            |     | metab_1232<br>5 | 9076-44-2   | 588.29 | 4.39 | M-H2O-H       | C31H41N7O6   | 1.66 | 1.46 | 0.01 |
| 822 | neg_2864 | Alpha-<br>Fluoromethylhistamine                        |     | metab_9581      | -           | 428.25 | 3.99 | 3M-H          | C6H10FN3     | 1.68 | 1.46 | 0.01 |
| 823 | pos_6233 | Prenyl glucoside                                       |     | metab_5698      | 117861-55-9 | 560.27 | 2.34 | 2M+ACN+Na     | C11H20O6     | 1.67 | 1.47 | 0.00 |
| 824 | neg_5042 | Janthitrem G                                           |     | metab_1191<br>5 | 90986-51-9  | 610.36 | 5.33 | M-H2O-H       | C39H51NO6    | 1.82 | 1.47 | 0.00 |
| 825 | pos_5380 | Ser Leu Leu                                            |     | metab_4755      | -           | 332.22 | 3.74 | M+H           | C15H29N3O5   | 1.45 | 1.47 | 0.04 |

|     |          |                                                  |             |            |        |      |                           |              |      |      |      |
|-----|----------|--------------------------------------------------|-------------|------------|--------|------|---------------------------|--------------|------|------|------|
| 826 | neg_5053 | Aconitinum                                       | metab_11927 | -          | 644.31 | 5.28 | M-H                       | C34H47NO11   | 1.78 | 1.47 | 0.00 |
| 827 | pos_6622 | Ile Gly Lys                                      | metab_6109  | -          | 317.22 | 1.92 | M+H                       | C14H28N4O4   | 1.64 | 1.47 | 0.01 |
| 828 | neg_619  | DG(12:0/20:5(7Z,9Z,11E,13E,17Z)-3OH(5,6,15)/0:0) | metab_13155 | -          | 643.37 | 5.55 | M+Na-2H,<br>M+K-2H        | C35H58O8     | 1.75 | 1.47 | 0.01 |
| 829 | neg_5612 | Nalbuphine                                       | metab_12538 | 20594-83-6 | 378.17 | 4.07 | M+Na-2H                   | C21H27NO4    | 1.60 | 1.48 | 0.01 |
| 830 | neg_5176 | Piperolein B                                     | metab_12063 | 30505-89-6 | 364.19 | 4.92 | M+Na-2H                   | C21H29NO3    | 1.77 | 1.48 | 0.02 |
| 831 | pos_2753 | Thr Val Leu                                      | metab_1897  | -          | 332.22 | 3.18 | M+H                       | C15H29N3O5   | 1.67 | 1.48 | 0.00 |
| 832 | neg_5127 | PS(5-iso PGF2VI/14:0)                            | metab_12009 | -          | 812.41 | 5.05 | M+Cl                      | C38H68NO13P  | 1.96 | 1.48 | 0.00 |
| 833 | pos_5449 | Gly Ile Phe                                      | metab_4831  | -          | 336.19 | 3.59 | M+H                       | C17H25N3O4   | 1.55 | 1.48 | 0.00 |
| 834 | pos_774  | Thr Val Phe<br>3-                                | metab_7299  | -          | 366.20 | 4.48 | M+H, M+Na                 | C18H27N3O5   | 1.62 | 1.48 | 0.01 |
| 835 | neg_2849 | Aminopropyl(diethoxymethyl)phosphinic acid       | metab_9564  | -          | 674.34 | 3.97 | 3M-H                      | C8H20NO4P    | 1.62 | 1.48 | 0.03 |
| 836 | pos_2903 | PA(LTE4/18:4(6Z,9Z,12Z,15Z))                     | metab_2063  | -          | 437.72 | 3.53 | M+H+Na                    | C44H70NO11PS | 1.58 | 1.48 | 0.01 |
| 837 | pos_6088 | Gentamicin A sulfate                             | metab_5537  | -          | 433.23 | 2.54 | M+H-2H2O                  | C18H36N4O10  | 1.63 | 1.48 | 0.02 |
| 838 | pos_2304 | Murametide                                       | metab_1408  | -          | 548.26 | 2.26 | M+ACN+H                   | C20H34N4O11  | 1.72 | 1.48 | 0.00 |
| 839 | pos_5882 | Versetamide                                      | metab_5310  | -          | 490.25 | 2.87 | M+H-H2O                   | C20H37N5O10  | 1.71 | 1.48 | 0.00 |
| 840 | pos_5458 | Ser Val Phe                                      | metab_4840  | -          | 352.19 | 3.56 | M+H                       | C17H25N3O5   | 1.64 | 1.49 | 0.00 |
| 841 | pos_100  | Ala Leu Phe                                      | metab_2     | -          | 350.21 | 4.51 | M+H,<br>2M+ACN+H,<br>M+Na | C18H27N3O4   | 1.67 | 1.49 | 0.00 |
| 842 | pos_6225 | Butirosina                                       | metab_5689  | -          | 520.26 | 2.35 | M+H-2H2O                  | C21H41N5O12  | 1.72 | 1.49 | 0.00 |

|     |          |                                                                  |                 |             |        |      |                  |             |      |      |      |
|-----|----------|------------------------------------------------------------------|-----------------|-------------|--------|------|------------------|-------------|------|------|------|
| 843 | pos_5793 | Ile Asp Val Glu                                                  | metab_5211      | -           | 475.24 | 3.00 | M+H              | C20H34N4O9  | 1.69 | 1.49 | 0.01 |
| 844 | neg_6217 | 2-Hydroxy-desipramine<br>glucuronide                             | metab_1318<br>1 | -           | 479.18 | 3.14 | M+Na-2H          | C24H30N2O7  | 1.82 | 1.49 | 0.00 |
| 845 | pos_2971 | Plazomicin                                                       | metab_2138      | -           | 656.36 | 3.71 | M+ACN+Na         | C25H48N6O10 | 1.69 | 1.49 | 0.00 |
| 846 | pos_2347 | PIP(20:2(11Z,14Z)/TXB2)                                          | metab_1452      | -           | 529.26 | 2.35 | M+2H             | C49H86O20P2 | 1.71 | 1.49 | 0.00 |
| 847 | pos_5207 | Ile Gly Phe                                                      | metab_4565      | -           | 336.19 | 4.11 | M+H              | C17H25N3O4  | 1.55 | 1.49 | 0.01 |
| 848 | pos_2367 | 8-Hydroxymianserin                                               | metab_1474      | -           | 602.35 | 2.39 | 2M+ACN+H         | C18H20N2O   | 1.67 | 1.49 | 0.00 |
| 849 | pos_5287 | Ser Leu Ile                                                      | metab_4652      | -           | 332.22 | 3.93 | M+H              | C15H29N3O5  | 1.64 | 1.50 | 0.00 |
| 850 | neg_3281 | 24,24-Dfhv                                                       | metab_1003<br>4 | -           | 471.28 | 4.93 | M+Cl             | C27H42F2O2  | 1.70 | 1.50 | 0.02 |
| 851 | neg_5760 | Ile-Val-Val                                                      | metab_1269<br>9 | -           | 328.22 | 3.83 | M-H              | C16H31N3O4  | 1.71 | 1.50 | 0.01 |
| 852 | pos_4945 | Capsicoside E1                                                   | metab_4276      | 109575-83-9 | 607.29 | 4.79 | M+2H             | C56H92O28   | 1.71 | 1.50 | 0.00 |
| 853 | pos_5074 | PI(22:6(4Z,7Z,10Z,12E,16Z,<br>19Z)-<br>OH(14)/22:3(10Z,13Z,16Z)) | metab_4418      | -           | 518.28 | 4.41 | M+2Na            | C54H87O14P  | 1.62 | 1.50 | 0.00 |
| 854 | neg_2642 | N-Lauroyl Tryptophan                                             | metab_9340      | -           | 385.25 | 3.57 | M-H              | C23H34N2O3  | 1.72 | 1.50 | 0.01 |
| 855 | neg_701  | (-)-2-<br>Difluoromethylornithine                                | metab_1399<br>8 | -           | 545.26 | 2.69 | 2M+FA-H,<br>3M-H | C6H12F2N2O2 | 1.84 | 1.50 | 0.01 |
| 856 | pos_6202 | Strictosidine                                                    | metab_5664      | 20824-29-7  | 548.26 | 2.38 | M+NH4            | C27H34N2O9  | 1.76 | 1.50 | 0.00 |
| 857 | pos_5275 | Leu Gly Phe                                                      | metab_4639      | -           | 336.19 | 3.96 | M+H              | C17H25N3O4  | 1.58 | 1.50 | 0.01 |
| 858 | pos_5728 | Alanylvaline                                                     | metab_5139      | 3303-45-5   | 440.25 | 3.11 | 2M+ACN+Na        | C8H16N2O3   | 1.61 | 1.50 | 0.01 |
| 859 | neg_5198 | Virginiamycin m1                                                 | metab_1208<br>6 | 21411-53-0  | 506.23 | 4.87 | M-H2O-H          | C28H35N3O7  | 1.80 | 1.50 | 0.01 |
| 860 | pos_6057 | Beta-Alanyl-L-arginine                                           | metab_5503      | -           | 529.26 | 2.58 | 2M+K             | C9H19N5O3   | 1.73 | 1.50 | 0.00 |
| 861 | neg_2682 | Coutaric acid                                                    | metab_9383      | -           | 394.20 | 3.64 | M+FA-H           | C18H27N3O4  | 1.66 | 1.50 | 0.01 |
| 862 | pos_2091 | Ala Val Thr                                                      | metab_1180      | -           | 290.17 | 1.87 | M+H              | C12H23N3O5  | 1.65 | 1.51 | 0.01 |

|     |          |                                           |             |             |        |      |           |              |      |      |      |
|-----|----------|-------------------------------------------|-------------|-------------|--------|------|-----------|--------------|------|------|------|
| 863 | pos_775  | Ile Val Ile                               | metab_7310  | -           | 344.25 | 4.49 | M+H, M+Na | C17H33N3O4   | 1.65 | 1.51 | 0.01 |
| 864 | pos_3043 | Gln Leu Leu                               | metab_2218  | -           | 373.24 | 3.92 | M+H       | C17H32N4O5   | 1.66 | 1.51 | 0.00 |
| 865 | pos_2611 | Val Val Val                               | metab_1741  | -           | 316.22 | 2.87 | M+H       | C15H29N3O4   | 1.67 | 1.51 | 0.00 |
| 866 | neg_5380 | Linalool 3,7-oxide beta-primeveroside     | metab_12286 | -           | 463.22 | 4.46 | M-H       | C21H36O11    | 1.76 | 1.51 | 0.01 |
| 867 | neg_2925 | Valylproline                              | metab_9647  | 20488-27-1  | 473.26 | 4.12 | 2M+FA-H   | C10H18N2O3   | 1.73 | 1.51 | 0.02 |
| 868 | neg_5637 | Colforsin daropate                        | metab_12564 | -           | 546.24 | 4.02 | M+K-2H    | C27H43NO8    | 1.75 | 1.52 | 0.00 |
| 869 | pos_2882 | Glycinamide, glycyl-L-prolyl-             | metab_2039  | -           | 474.28 | 3.49 | 2M+NH4    | C9H16N4O3    | 1.72 | 1.52 | 0.00 |
| 870 | pos_827  | 8-Pentanoynleosolaniol                    | metab_7456  | 116163-74-7 | 489.21 | 5.28 | M+H, M+Na | C24H34O9     | 1.66 | 1.52 | 0.00 |
| 871 | pos_2964 | Caffeine                                  | metab_2130  | 21399.00    | 430.20 | 3.70 | 2M+ACN+H  | C8H10N4O2    | 1.66 | 1.53 | 0.00 |
| 872 | neg_3154 | Dynorphin B (6-9)                         | metab_9895  | -           | 626.32 | 4.59 | M+Na-2H   | C26H43N11O6  | 1.86 | 1.53 | 0.00 |
| 873 | pos_2333 | Gamma-L-Glutamyl-L-pipecolic acid         | metab_1439  | -           | 276.15 | 2.33 | M+NH4     | C11H18N2O5   | 1.66 | 1.53 | 0.00 |
| 874 | neg_3479 | Aplaviroc                                 | metab_10248 | -           | 576.30 | 5.56 | M-H       | C33H43N3O6   | 1.83 | 1.54 | 0.00 |
| 875 | pos_3423 | Nafarelin                                 | metab_2639  | 76932-56-4  | 661.83 | 5.49 | M+2H      | C66H83N17O13 | 1.74 | 1.54 | 0.00 |
| 876 | neg_3503 | Fosteabine                                | metab_10276 | 73532-83-9  | 574.33 | 5.58 | M-H       | C27H50N3O8P  | 1.82 | 1.54 | 0.00 |
| 877 | neg_5655 | Capsianside A                             | metab_12584 | 116107-40-5 | 781.39 | 3.99 | M-2H      | C76H124O33   | 1.97 | 1.54 | 0.00 |
| 878 | neg_5438 | Hordatine A                               | metab_12348 | 7073-64-5   | 587.27 | 4.35 | M+Na-2H   | C28H38N8O5   | 1.81 | 1.55 | 0.01 |
| 879 | pos_6276 | 11-beta-Hydroxyandrosterone-3-glucuronide | metab_7646  | -           | 515.28 | 2.28 | M+CH3OH+H | C25H38O9     | 1.70 | 1.55 | 0.00 |



|     |          |                                                                  |                 |             |        |      |               |                   |      |      |      |
|-----|----------|------------------------------------------------------------------|-----------------|-------------|--------|------|---------------|-------------------|------|------|------|
| 880 | pos_5599 | Leu Lys Leu                                                      | metab_4995      | -           | 373.28 | 3.31 | M+H           | C18H36N4O4        | 1.74 | 1.55 | 0.01 |
| 881 | pos_3082 | Val Ile Leu                                                      | metab_2261      | -           | 344.25 | 4.04 | M+H           | C17H33N3O4        | 1.70 | 1.55 | 0.00 |
| 882 | neg_3153 | D-Glucamine                                                      | metab_9894      | -           | 542.28 | 4.59 | 3M-H          | C6H15NO5          | 1.86 | 1.55 | 0.01 |
| 883 | pos_5387 | Leu Gly Leu                                                      | metab_4762      | -           | 302.21 | 3.72 | M+H           | C14H27N3O4        | 1.69 | 1.55 | 0.00 |
| 884 | pos_2355 | Thr Val Val                                                      | metab_1461      | -           | 318.20 | 2.37 | M+H           | C14H27N3O5        | 1.62 | 1.55 | 0.03 |
| 885 | neg_3300 | LysoPE(22:2(13Z,16Z)/0:0)                                        | metab_1005<br>6 | -           | 554.32 | 4.98 | M+Na-2H       | C27H52NO7P        | 1.87 | 1.55 | 0.00 |
| 886 | pos_5676 | Teleocidin B 2                                                   | metab_5081      | -           | 490.29 | 3.18 | M+K           | C28H41N3O2        | 1.76 | 1.55 | 0.00 |
| 887 | neg_2671 | Alkergot                                                         | metab_9371      | -           | 628.30 | 3.62 | M+K-2H        | C33H45N5O5        | 1.84 | 1.57 | 0.00 |
| 888 | pos_5508 | Val Glu Leu                                                      | metab_4895      | -           | 360.21 | 3.47 | M+H           | C16H29N3O6        | 1.70 | 1.57 | 0.02 |
| 889 | neg_1414 | Guanosine diphosphate                                            | metab_8089      | 146-91-8    | 442.02 | 1.10 | M-H           | C10H15N5O11P<br>2 | 1.78 | 1.57 | 0.03 |
| 890 | pos_2873 | Hoduloside X                                                     | metab_2029      | 154971-14-9 | 558.28 | 3.44 | M+H+Na        | C53H88O23         | 1.85 | 1.59 | 0.00 |
| 891 | pos_3302 | Araloside S1                                                     | metab_2505      | 256531-73-4 | 623.32 | 4.87 | M+2Na         | C61H100O23        | 1.82 | 1.60 | 0.00 |
| 892 | pos_5375 | Arjunolic acid 3-glucoside                                       | metab_4750      | 99543-11-0  | 673.39 | 3.74 | M+Na          | C36H58O10         | 1.88 | 1.60 | 0.00 |
| 893 | pos_2570 | Telocinobufagin                                                  | metab_1696      | 472-26-4    | 447.21 | 2.77 | M+2Na-H       | C24H34O5          | 1.76 | 1.61 | 0.01 |
| 894 | neg_2322 | AFN911                                                           | metab_9006      | -           | 546.24 | 3.03 | M+Cl          | C29H33N7O2        | 1.91 | 1.62 | 0.03 |
| 895 | pos_5248 | Nummularine A                                                    | metab_4609      | 53947-95-8  | 680.41 | 4.01 | M+CH3OH+<br>H | C36H49N5O6        | 1.97 | 1.63 | 0.00 |
| 896 | pos_5424 | Deoxycholic acid 3-glucuronide                                   | metab_4804      | 72504-58-6  | 551.32 | 3.63 | M+H-H2O       | C30H48O10         | 1.76 | 1.63 | 0.00 |
| 897 | pos_4811 | PI(22:6(5Z,8E,10Z,13Z,15E,19Z)-2OH(7S,17S)/20:4(8Z,11Z,14Z,17Z)) | metab_4129      | -           | 927.50 | 5.31 | M+H-2H2O      | C51H79O15P        | 1.86 | 1.63 | 0.00 |
| 898 | pos_791  | Ala Leu Leu                                                      | metab_7416      | -           | 338.20 | 4.71 | M+H, M+Na     | C15H29N3O4        | 1.81 | 1.63 | 0.00 |
| 899 | pos_5758 | Ser Val Leu                                                      | metab_5172      | -           | 318.20 | 3.07 | M+H           | C14H27N3O5        | 1.70 | 1.64 | 0.01 |
| 900 | pos_4815 | Arachidonic acid                                                 | metab_4133      | 73836-78-9  | 514.29 | 5.64 | M+NH4         | C25H40N2O6S       | 1.36 | 1.64 | 0.00 |

|     |          |                                       |             |            |        |      |                 |                   |      |      |      |
|-----|----------|---------------------------------------|-------------|------------|--------|------|-----------------|-------------------|------|------|------|
| 901 | pos_2786 | Antigonadotropic decapeptide          | metab_1933  | -          | 616.78 | 3.26 | M+2Na           | C58H81N11O16      | 1.93 | 1.66 | 0.00 |
| 902 | pos_5460 | Milbemycin alpha <sup>9</sup>         | metab_4843  | -          | 701.33 | 3.55 | M+ACN+Na        | C36H47NO9         | 1.91 | 1.66 | 0.00 |
| 903 | pos_5233 | Ile Gln Leu                           | metab_4593  | -          | 373.24 | 4.04 | M+H             | C17H32N4O5        | 1.83 | 1.67 | 0.01 |
| 904 | neg_5231 | Yakuchinone-A                         | metab_12124 | 78954-23-1 | 683.36 | 4.80 | 2M+Hac-H        | C20H24O3          | 2.05 | 1.67 | 0.00 |
| 905 | pos_3106 | 1-Adamantanecarbonyl-RF-NH2           | metab_2288  | -          | 546.31 | 4.12 | M+ACN+Na        | C26H38N6O3        | 1.87 | 1.68 | 0.00 |
| 906 | pos_1069 | Phytosphingosine                      | metab_78    | 554-62-1   | 318.30 | 5.89 | M+H-H2O,<br>M+H | C18H39NO3         | 1.98 | 1.68 | 0.00 |
| 907 | pos_3040 | Isoleucyl-Threonine                   | metab_2215  | -          | 528.30 | 3.91 | 2M+ACN+Na       | C10H20N2O4        | 1.85 | 1.70 | 0.01 |
| 908 | pos_5454 | Coclaurine                            | metab_7655  | 486-39-5   | 593.26 | 3.57 | 2M+Na           | C17H19NO3         | 1.89 | 1.71 | 0.00 |
| 909 | pos_5784 | PA(10:0/PGE1)                         | metab_5201  | -          | 701.35 | 3.01 | M+K             | C33H59O11P        | 1.82 | 1.71 | 0.01 |
| 910 | pos_744  | Ile Thr Ile                           | metab_6971  | -          | 346.23 | 4.18 | M+H, M+Na       | C16H31N3O5        | 1.81 | 1.71 | 0.01 |
| 911 | pos_5078 | H-Tyr-Phe-Leu-Phe-Arg-Pro-Arg-Asn-NH2 | metab_4422  | -          | 556.31 | 4.40 | M+2H            | C54H78N16O10      | 1.93 | 1.75 | 0.00 |
| 912 | neg_3213 | Lyciumoside III                       | metab_9959  | -          | 629.35 | 4.76 | M-H2O-H         | C32H56O13         | 1.87 | 1.75 | 0.04 |
| 913 | neg_7014 | Thr Val Ala Lys                       | metab_14003 | -          | 416.25 | 2.07 | M-H             | C18H35N5O6        | 2.15 | 1.76 | 0.00 |
| 914 | pos_826  | Hebevinoside III                      | metab_7455  | 89203-39-4 | 817.48 | 5.28 | M+H, M+Na       | C43H70O13         | 2.02 | 1.79 | 0.00 |
| 915 | pos_5683 | Ile Gln Val                           | metab_5089  | -          | 359.23 | 3.17 | M+H             | C16H30N4O5        | 1.90 | 1.79 | 0.01 |
| 916 | neg_4850 | Taurin                                | metab_11703 | -          | 285.09 | 5.68 | M+K-2H          | C15H20O3          | 1.92 | 1.80 | 0.00 |
| 917 | neg_5361 | Petromyzonol sulfate                  | metab_12265 | -          | 473.26 | 4.50 | M-H             | C24H42O7S         | 1.95 | 1.81 | 0.01 |
| 918 | pos_3226 | CDP-DG(22:3(10Z,13Z,16Z)/20:5(        | metab_2420  | -          | 554.79 | 4.51 | M+2H            | C55H87N3O16P<br>2 | 2.02 | 1.86 | 0.00 |

|     |          |                                   |             |             |        |      |           |             |      |      |      |
|-----|----------|-----------------------------------|-------------|-------------|--------|------|-----------|-------------|------|------|------|
|     |          | 5Z,8Z,11Z,14Z,16E)-<br>OH(18))    |             |             |        |      |           |             |      |      |      |
| 919 | pos_5982 | Leu Ala Ser Ser Thr               | metab_5421  | -           | 478.25 | 2.68 | M+H       | C19H35N5O9  | 2.03 | 1.86 | 0.00 |
| 920 | neg_2926 | Deoxynivalenol                    | metab_9648  | 51481-10-8  | 591.25 | 4.12 | 2M-H      | C15H20O6    | 2.15 | 1.86 | 0.00 |
| 921 | pos_3025 | Ile Ala Ile                       | metab_2198  | -           | 316.22 | 3.87 | M+H       | C15H29N3O4  | 1.90 | 1.88 | 0.01 |
| 922 | neg_2996 | Heliotron                         | metab_9722  | -           | 671.37 | 4.25 | 2M+FA-H   | C16H27NO5   | 2.16 | 1.90 | 0.00 |
| 923 | pos_3287 | Cyclolinopeptide B                | metab_2487  | -           | 540.79 | 4.80 | M+H+Na    | C56H83N9O9S | 2.17 | 1.90 | 0.00 |
| 924 | pos_4934 | Asparagoside A                    | metab_4264  | 14835-43-9  | 617.35 | 4.82 | M+K       | C33H54O8    | 1.92 | 1.90 | 0.00 |
| 925 | neg_3111 | Oleoylglycerophosphoserine        | metab_9848  | -           | 544.26 | 4.48 | M+Na-2H   | C24H46NO9P  | 2.04 | 1.92 | 0.02 |
| 926 | neg_4975 | Indinavir                         | metab_11841 | 150378-17-9 | 658.36 | 5.53 | M+FA-H    | C36H47N5O4  | 2.14 | 1.94 | 0.00 |
| 927 | pos_5790 | Ile Ala Val                       | metab_5208  | -           | 302.21 | 3.01 | M+H       | C14H27N3O4  | 1.76 | 1.97 | 0.02 |
| 928 | neg_3466 | Clarithromycin                    | metab_10236 | 81103-11-9  | 768.45 | 5.53 | M+Na-2H   | C38H69NO13  | 2.14 | 1.98 | 0.01 |
| 929 | neg_5285 | Glycyl-Histidine                  | metab_12180 | -           | 635.27 | 4.67 | 3M-H      | C8H12N4O3   | 2.00 | 2.03 | 0.03 |
| 930 | pos_2808 | Met Val Glu                       | metab_1958  | -           | 378.17 | 3.31 | M+H       | C15H27N3O6S | 1.81 | 2.04 | 0.04 |
| 931 | neg_2567 | PS(14:0/14:1(9Z))                 | metab_9259  | -           | 714.38 | 3.40 | M+K-2H    | C34H64NO10P | 2.09 | 2.09 | 0.02 |
| 932 | pos_796  | Schidigerasaponin B1              | metab_7421  | 266997-32-4 | 885.46 | 4.79 | M+H, M+Na | C44H68O18   | 2.25 | 2.11 | 0.00 |
| 933 | pos_7605 | PE(18:4(6Z,9Z,12Z,15Z)/24:1(15Z)) | metab_7153  | -           | 274.87 | 0.54 | M+3H      | C47H84NO8P  | 1.85 | 2.15 | 0.02 |
| 934 | pos_5047 | Mucronine D                       | metab_4388  | 38496-00-3  | 694.42 | 4.47 | M+CH3OH+H | C37H51N5O6  | 2.26 | 2.30 | 0.00 |
| 935 | pos_5416 | Desglucocheirotaxol               | metab_4795  | 29336-13-8  | 570.32 | 3.65 | M+NH4     | C29H44O10   | 2.27 | 2.66 | 0.00 |

|     |          |                          |                 |            |        |      |                  |             |      |      |      |
|-----|----------|--------------------------|-----------------|------------|--------|------|------------------|-------------|------|------|------|
| 936 | neg_391  | Pentacarboxylporphyrin I | metab_1069<br>8 | 28100-78-9 | 697.25 | 4.82 | M-H, M+Na-<br>2H | C37H38N4O10 | 2.80 | 2.80 | 0.00 |
| 937 | pos_5172 | Pirbuterol               | metab_4527      | 38677-81-5 | 522.33 | 4.19 | 2M+ACN+H         | C12H20N2O3  | 2.32 | 3.12 | 0.00 |
| 938 | neg_3132 | Ergocristine             | metab_9871      | 511-08-0   | 630.26 | 4.53 | M+Na-2H          | C35H39N5O5  | 2.61 | 3.23 | 0.00 |
| 939 | pos_4901 | Leucylproline            | metab_4228      | 6403-35-6  | 520.31 | 4.92 | 2M+ACN+Na        | C11H20N2O3  | 2.50 | 4.27 | 0.00 |
| 940 | pos_5277 | Milataxel                | metab_4641      | -          | 854.37 | 3.95 | M+H              | C44H55NO16  | 2.90 | 8.66 | 0.00 |
